# Supplementary material for: Identification and characterization of auxin response factor (ARF) family members involved in fig (Ficus carica L.) fruit development
Source: PeerJ. 2022 Jul 22;10:e13798. doi: 10.7717/peerj.13798 (PMC9310797; doi:10.7717/peerj.13798)
Supplement: Supplemental Information 12 [file peerj-10-13798-s012.xls]

## Sheet: Sample Setup
Block Type	384-Well Block
Calibration Background is expired	No
Calibration Background performed on	12-23-2020
Calibration Pure Dye FAM is expired	No
Calibration Pure Dye FAM performed on	12-23-2020
Calibration Pure Dye NED is expired	No
Calibration Pure Dye NED performed on	12-23-2020
Calibration Pure Dye ROX is expired	No
Calibration Pure Dye ROX performed on	12-23-2020
Calibration Pure Dye SYBR is expired	No
Calibration Pure Dye SYBR performed on	12-23-2020
Calibration Pure Dye TAMRA is expired	No
Calibration Pure Dye TAMRA performed on	12-23-2020
Calibration Pure Dye VIC is expired	No
Calibration Pure Dye VIC performed on	12-23-2020
Calibration RNaseP is expired	No
Calibration RNaseP performed on	11-03-2016
Calibration ROI is expired	No
Calibration ROI performed on	12-23-2020
Calibration Uniformity is expired	No
Calibration Uniformity performed on	12-23-2020
Chemistry	SYBR_GREEN
Date Created	2021-12-16 20:20:14 PM CST
Experiment Barcode
Experiment Comment
Experiment File Name	C:\Users\zgnyd\Documents\WeChat Files\wxid_3g6h1irk34e722\FileStorage\File\2022-04\2021-12-16 tissues.eds
Experiment Name	2021-12-16 202009
Experiment Run End Time	2010-01-05 03:43:04 AM CST
Experiment Type	Comparative Cт (ΔΔCт)
Instrument Name	278861484
Instrument Serial Number	278861484
Instrument Type	QuantStudio(TM) 6 Flex System
Passive Reference	ROX
Quantification Cycle Method	Ct
Signal Smoothing On	true
Stage/ Cycle where Analysis is performed	Stage 2, Step 2
User Name
Well	Well Position	Sample Name	Sample Color	Biogroup Name	Biogroup Color	Target Name	Target Color	Task	Reporter	Quencher	Quantity	Comments
1	A1	Root	RGB(176,23,31)			FcARF1	RGB(176,23,31)	UNKNOWN	SYBR	None
2	A2	Root	RGB(176,23,31)			FcARF2	RGB(176,23,31)	UNKNOWN	SYBR	None
3	A3	Root	RGB(176,23,31)			FcARF3	RGB(0,0,255)	UNKNOWN	SYBR	None
4	A4	Root	RGB(176,23,31)			FcARF4	RGB(0,139,69)	UNKNOWN	SYBR	None
5	A5	Root	RGB(176,23,31)			FcARF5	RGB(238,238,0)	UNKNOWN	SYBR	None
6	A6	Root	RGB(176,23,31)			FcARF6	RGB(139,137,112)	UNKNOWN	SYBR	None
7	A7	Root	RGB(176,23,31)			FcARF7	RGB(238,121,66)	UNKNOWN	SYBR	None
8	A8	Root	RGB(176,23,31)			FcARF8	RGB(142,56,142)	UNKNOWN	SYBR	None
9	A9	Root	RGB(176,23,31)			FcARF9	RGB(198,113,113)	UNKNOWN	SYBR	None
10	A10	Root	RGB(176,23,31)			FcARF10	RGB(0,245,255)	UNKNOWN	SYBR	None
11	A11	Root	RGB(176,23,31)			FcARF11	RGB(238,220,130)	UNKNOWN	SYBR	None
12	A12	Root	RGB(176,23,31)			FcARF12	RGB(255,127,0)	UNKNOWN	SYBR	None
13	A13	Root	RGB(176,23,31)			FcARF13	RGB(142,142,56)	UNKNOWN	SYBR	None
14	A14	Root	RGB(176,23,31)			FcARF14	RGB(238,44,44)	UNKNOWN	SYBR	None
15	A15	Root	RGB(176,23,31)			FcARF15	RGB(238,18,137)	UNKNOWN	SYBR	None
16	A16	Root	RGB(176,23,31)			FcARF16	RGB(176,23,31)	UNKNOWN	SYBR	None
17	A17	Root	RGB(176,23,31)			FcARF17	RGB(0,0,255)	UNKNOWN	SYBR	None
18	A18	Root	RGB(176,23,31)			FcARF18	RGB(0,139,69)	UNKNOWN	SYBR	None
19	A19	Root	RGB(176,23,31)			FcARF19	RGB(238,238,0)	UNKNOWN	SYBR	None
20	A20	Root	RGB(176,23,31)			FcARF20	RGB(139,137,112)	UNKNOWN	SYBR	None
21	A21	Root	RGB(176,23,31)			Actin	RGB(238,121,66)	UNKNOWN	SYBR	None
22	A22	Peel	RGB(139,137,112)			FcARF1	RGB(176,23,31)	UNKNOWN	SYBR	None
23	A23	Peel	RGB(139,137,112)			FcARF1	RGB(176,23,31)	UNKNOWN	SYBR	None
24	A24	Peel	RGB(139,137,112)			FcARF1	RGB(176,23,31)	UNKNOWN	SYBR	None
25	B1	Root	RGB(176,23,31)			FcARF1	RGB(176,23,31)	UNKNOWN	SYBR	None
26	B2	Root	RGB(176,23,31)			FcARF2	RGB(176,23,31)	UNKNOWN	SYBR	None
27	B3	Root	RGB(176,23,31)			FcARF3	RGB(0,0,255)	UNKNOWN	SYBR	None
28	B4	Root	RGB(176,23,31)			FcARF4	RGB(0,139,69)	UNKNOWN	SYBR	None
29	B5	Root	RGB(176,23,31)			FcARF5	RGB(238,238,0)	UNKNOWN	SYBR	None
30	B6	Root	RGB(176,23,31)			FcARF6	RGB(139,137,112)	UNKNOWN	SYBR	None
31	B7	Root	RGB(176,23,31)			FcARF7	RGB(238,121,66)	UNKNOWN	SYBR	None
32	B8	Root	RGB(176,23,31)			FcARF8	RGB(142,56,142)	UNKNOWN	SYBR	None
33	B9	Root	RGB(176,23,31)			FcARF9	RGB(198,113,113)	UNKNOWN	SYBR	None
34	B10	Root	RGB(176,23,31)			FcARF10	RGB(0,245,255)	UNKNOWN	SYBR	None
35	B11	Root	RGB(176,23,31)			FcARF11	RGB(238,220,130)	UNKNOWN	SYBR	None
36	B12	Root	RGB(176,23,31)			FcARF12	RGB(255,127,0)	UNKNOWN	SYBR	None
37	B13	Root	RGB(176,23,31)			FcARF13	RGB(142,142,56)	UNKNOWN	SYBR	None
38	B14	Root	RGB(176,23,31)			FcARF14	RGB(238,44,44)	UNKNOWN	SYBR	None
39	B15	Root	RGB(176,23,31)			FcARF15	RGB(238,18,137)	UNKNOWN	SYBR	None
40	B16	Root	RGB(176,23,31)			FcARF16	RGB(176,23,31)	UNKNOWN	SYBR	None
41	B17	Root	RGB(176,23,31)			FcARF17	RGB(0,0,255)	UNKNOWN	SYBR	None
42	B18	Root	RGB(176,23,31)			FcARF18	RGB(0,139,69)	UNKNOWN	SYBR	None
43	B19	Root	RGB(176,23,31)			FcARF19	RGB(238,238,0)	UNKNOWN	SYBR	None
44	B20	Root	RGB(176,23,31)			FcARF20	RGB(139,137,112)	UNKNOWN	SYBR	None
45	B21	Root	RGB(176,23,31)			Actin	RGB(238,121,66)	UNKNOWN	SYBR	None
46	B22	Peel	RGB(139,137,112)			FcARF2	RGB(176,23,31)	UNKNOWN	SYBR	None
47	B23	Peel	RGB(139,137,112)			FcARF2	RGB(176,23,31)	UNKNOWN	SYBR	None
48	B24	Peel	RGB(139,137,112)			FcARF2	RGB(176,23,31)	UNKNOWN	SYBR	None
49	C1	Root	RGB(176,23,31)			FcARF1	RGB(176,23,31)	UNKNOWN	SYBR	None
50	C2	Root	RGB(176,23,31)			FcARF2	RGB(176,23,31)	UNKNOWN	SYBR	None
51	C3	Root	RGB(176,23,31)			FcARF3	RGB(0,0,255)	UNKNOWN	SYBR	None
52	C4	Root	RGB(176,23,31)			FcARF4	RGB(0,139,69)	UNKNOWN	SYBR	None
53	C5	Root	RGB(176,23,31)			FcARF5	RGB(238,238,0)	UNKNOWN	SYBR	None
54	C6	Root	RGB(176,23,31)			FcARF6	RGB(139,137,112)	UNKNOWN	SYBR	None
55	C7	Root	RGB(176,23,31)			FcARF7	RGB(238,121,66)	UNKNOWN	SYBR	None
56	C8	Root	RGB(176,23,31)			FcARF8	RGB(142,56,142)	UNKNOWN	SYBR	None
57	C9	Root	RGB(176,23,31)			FcARF9	RGB(198,113,113)	UNKNOWN	SYBR	None
58	C10	Root	RGB(176,23,31)			FcARF10	RGB(0,245,255)	UNKNOWN	SYBR	None
59	C11	Root	RGB(176,23,31)			FcARF11	RGB(238,220,130)	UNKNOWN	SYBR	None
60	C12	Root	RGB(176,23,31)			FcARF12	RGB(255,127,0)	UNKNOWN	SYBR	None
61	C13	Root	RGB(176,23,31)			FcARF13	RGB(142,142,56)	UNKNOWN	SYBR	None
62	C14	Root	RGB(176,23,31)			FcARF14	RGB(238,44,44)	UNKNOWN	SYBR	None
63	C15	Root	RGB(176,23,31)			FcARF15	RGB(238,18,137)	UNKNOWN	SYBR	None
64	C16	Root	RGB(176,23,31)			FcARF16	RGB(176,23,31)	UNKNOWN	SYBR	None
65	C17	Root	RGB(176,23,31)			FcARF17	RGB(0,0,255)	UNKNOWN	SYBR	None
66	C18	Root	RGB(176,23,31)			FcARF18	RGB(0,139,69)	UNKNOWN	SYBR	None
67	C19	Root	RGB(176,23,31)			FcARF19	RGB(238,238,0)	UNKNOWN	SYBR	None
68	C20	Root	RGB(176,23,31)			FcARF20	RGB(139,137,112)	UNKNOWN	SYBR	None
69	C21	Root	RGB(176,23,31)			Actin	RGB(238,121,66)	UNKNOWN	SYBR	None
70	C22	Peel	RGB(139,137,112)			FcARF3	RGB(0,0,255)	UNKNOWN	SYBR	None
71	C23	Peel	RGB(139,137,112)			FcARF3	RGB(0,0,255)	UNKNOWN	SYBR	None
72	C24	Peel	RGB(139,137,112)			FcARF3	RGB(0,0,255)	UNKNOWN	SYBR	None
73	D1	Stem	RGB(176,23,31)			FcARF1	RGB(176,23,31)	UNKNOWN	SYBR	None
74	D2	Stem	RGB(176,23,31)			FcARF2	RGB(176,23,31)	UNKNOWN	SYBR	None
75	D3	Stem	RGB(176,23,31)			FcARF3	RGB(0,0,255)	UNKNOWN	SYBR	None
76	D4	Stem	RGB(176,23,31)			FcARF4	RGB(0,139,69)	UNKNOWN	SYBR	None
77	D5	Stem	RGB(176,23,31)			FcARF5	RGB(238,238,0)	UNKNOWN	SYBR	None
78	D6	Stem	RGB(176,23,31)			FcARF6	RGB(139,137,112)	UNKNOWN	SYBR	None
79	D7	Stem	RGB(176,23,31)			FcARF7	RGB(238,121,66)	UNKNOWN	SYBR	None
80	D8	Stem	RGB(176,23,31)			FcARF8	RGB(142,56,142)	UNKNOWN	SYBR	None
81	D9	Stem	RGB(176,23,31)			FcARF9	RGB(198,113,113)	UNKNOWN	SYBR	None
82	D10	Stem	RGB(176,23,31)			FcARF10	RGB(0,245,255)	UNKNOWN	SYBR	None
83	D11	Stem	RGB(176,23,31)			FcARF11	RGB(238,220,130)	UNKNOWN	SYBR	None
84	D12	Stem	RGB(176,23,31)			FcARF12	RGB(255,127,0)	UNKNOWN	SYBR	None
85	D13	Stem	RGB(176,23,31)			FcARF13	RGB(142,142,56)	UNKNOWN	SYBR	None
86	D14	Stem	RGB(176,23,31)			FcARF14	RGB(238,44,44)	UNKNOWN	SYBR	None
87	D15	Stem	RGB(176,23,31)			FcARF15	RGB(238,18,137)	UNKNOWN	SYBR	None
88	D16	Stem	RGB(176,23,31)			FcARF16	RGB(176,23,31)	UNKNOWN	SYBR	None
89	D17	Stem	RGB(176,23,31)			FcARF17	RGB(0,0,255)	UNKNOWN	SYBR	None
90	D18	Stem	RGB(176,23,31)			FcARF18	RGB(0,139,69)	UNKNOWN	SYBR	None
91	D19	Stem	RGB(176,23,31)			FcARF19	RGB(238,238,0)	UNKNOWN	SYBR	None
92	D20	Stem	RGB(176,23,31)			FcARF20	RGB(139,137,112)	UNKNOWN	SYBR	None
93	D21	Stem	RGB(176,23,31)			Actin	RGB(238,121,66)	UNKNOWN	SYBR	None
94	D22	Peel	RGB(139,137,112)			FcARF4	RGB(0,139,69)	UNKNOWN	SYBR	None
95	D23	Peel	RGB(139,137,112)			FcARF4	RGB(0,139,69)	UNKNOWN	SYBR	None
96	D24	Peel	RGB(139,137,112)			FcARF4	RGB(0,139,69)	UNKNOWN	SYBR	None
97	E1	Stem	RGB(176,23,31)			FcARF1	RGB(176,23,31)	UNKNOWN	SYBR	None
98	E2	Stem	RGB(176,23,31)			FcARF2	RGB(176,23,31)	UNKNOWN	SYBR	None
99	E3	Stem	RGB(176,23,31)			FcARF3	RGB(0,0,255)	UNKNOWN	SYBR	None
100	E4	Stem	RGB(176,23,31)			FcARF4	RGB(0,139,69)	UNKNOWN	SYBR	None
101	E5	Stem	RGB(176,23,31)			FcARF5	RGB(238,238,0)	UNKNOWN	SYBR	None
102	E6	Stem	RGB(176,23,31)			FcARF6	RGB(139,137,112)	UNKNOWN	SYBR	None
103	E7	Stem	RGB(176,23,31)			FcARF7	RGB(238,121,66)	UNKNOWN	SYBR	None
104	E8	Stem	RGB(176,23,31)			FcARF8	RGB(142,56,142)	UNKNOWN	SYBR	None
105	E9	Stem	RGB(176,23,31)			FcARF9	RGB(198,113,113)	UNKNOWN	SYBR	None
106	E10	Stem	RGB(176,23,31)			FcARF10	RGB(0,245,255)	UNKNOWN	SYBR	None
107	E11	Stem	RGB(176,23,31)			FcARF11	RGB(238,220,130)	UNKNOWN	SYBR	None
108	E12	Stem	RGB(176,23,31)			FcARF12	RGB(255,127,0)	UNKNOWN	SYBR	None
109	E13	Stem	RGB(176,23,31)			FcARF13	RGB(142,142,56)	UNKNOWN	SYBR	None
110	E14	Stem	RGB(176,23,31)			FcARF14	RGB(238,44,44)	UNKNOWN	SYBR	None
111	E15	Stem	RGB(176,23,31)			FcARF15	RGB(238,18,137)	UNKNOWN	SYBR	None
112	E16	Stem	RGB(176,23,31)			FcARF16	RGB(176,23,31)	UNKNOWN	SYBR	None
113	E17	Stem	RGB(176,23,31)			FcARF17	RGB(0,0,255)	UNKNOWN	SYBR	None
114	E18	Stem	RGB(176,23,31)			FcARF18	RGB(0,139,69)	UNKNOWN	SYBR	None
115	E19	Stem	RGB(176,23,31)			FcARF19	RGB(238,238,0)	UNKNOWN	SYBR	None
116	E20	Stem	RGB(176,23,31)			FcARF20	RGB(139,137,112)	UNKNOWN	SYBR	None
117	E21	Stem	RGB(176,23,31)			Actin	RGB(238,121,66)	UNKNOWN	SYBR	None
118	E22	Peel	RGB(139,137,112)			FcARF5	RGB(238,238,0)	UNKNOWN	SYBR	None
119	E23	Peel	RGB(139,137,112)			FcARF5	RGB(238,238,0)	UNKNOWN	SYBR	None
120	E24	Peel	RGB(139,137,112)			FcARF5	RGB(238,238,0)	UNKNOWN	SYBR	None
121	F1	Stem	RGB(176,23,31)			FcARF1	RGB(176,23,31)	UNKNOWN	SYBR	None
122	F2	Stem	RGB(176,23,31)			FcARF2	RGB(176,23,31)	UNKNOWN	SYBR	None
123	F3	Stem	RGB(176,23,31)			FcARF3	RGB(0,0,255)	UNKNOWN	SYBR	None
124	F4	Stem	RGB(176,23,31)			FcARF4	RGB(0,139,69)	UNKNOWN	SYBR	None
125	F5	Stem	RGB(176,23,31)			FcARF5	RGB(238,238,0)	UNKNOWN	SYBR	None
126	F6	Stem	RGB(176,23,31)			FcARF6	RGB(139,137,112)	UNKNOWN	SYBR	None
127	F7	Stem	RGB(176,23,31)			FcARF7	RGB(238,121,66)	UNKNOWN	SYBR	None
128	F8	Stem	RGB(176,23,31)			FcARF8	RGB(142,56,142)	UNKNOWN	SYBR	None
129	F9	Stem	RGB(176,23,31)			FcARF9	RGB(198,113,113)	UNKNOWN	SYBR	None
130	F10	Stem	RGB(176,23,31)			FcARF10	RGB(0,245,255)	UNKNOWN	SYBR	None
131	F11	Stem	RGB(176,23,31)			FcARF11	RGB(238,220,130)	UNKNOWN	SYBR	None
132	F12	Stem	RGB(176,23,31)			FcARF12	RGB(255,127,0)	UNKNOWN	SYBR	None
133	F13	Stem	RGB(176,23,31)			FcARF13	RGB(142,142,56)	UNKNOWN	SYBR	None
134	F14	Stem	RGB(176,23,31)			FcARF14	RGB(238,44,44)	UNKNOWN	SYBR	None
135	F15	Stem	RGB(176,23,31)			FcARF15	RGB(238,18,137)	UNKNOWN	SYBR	None
136	F16	Stem	RGB(176,23,31)			FcARF16	RGB(176,23,31)	UNKNOWN	SYBR	None
137	F17	Stem	RGB(176,23,31)			FcARF17	RGB(0,0,255)	UNKNOWN	SYBR	None
138	F18	Stem	RGB(176,23,31)			FcARF18	RGB(0,139,69)	UNKNOWN	SYBR	None
139	F19	Stem	RGB(176,23,31)			FcARF19	RGB(238,238,0)	UNKNOWN	SYBR	None
140	F20	Stem	RGB(176,23,31)			FcARF20	RGB(139,137,112)	UNKNOWN	SYBR	None
141	F21	Stem	RGB(176,23,31)			Actin	RGB(238,121,66)	UNKNOWN	SYBR	None
142	F22	Peel	RGB(139,137,112)			FcARF6	RGB(139,137,112)	UNKNOWN	SYBR	None
143	F23	Peel	RGB(139,137,112)			FcARF6	RGB(139,137,112)	UNKNOWN	SYBR	None
144	F24	Peel	RGB(139,137,112)			FcARF6	RGB(139,137,112)	UNKNOWN	SYBR	None
145	G1	Old leaves	RGB(0,0,255)			FcARF1	RGB(176,23,31)	UNKNOWN	SYBR	None
146	G2	Old leaves	RGB(0,0,255)			FcARF2	RGB(176,23,31)	UNKNOWN	SYBR	None
147	G3	Old leaves	RGB(0,0,255)			FcARF3	RGB(0,0,255)	UNKNOWN	SYBR	None
148	G4	Old leaves	RGB(0,0,255)			FcARF4	RGB(0,139,69)	UNKNOWN	SYBR	None
149	G5	Old leaves	RGB(0,0,255)			FcARF5	RGB(238,238,0)	UNKNOWN	SYBR	None
150	G6	Old leaves	RGB(0,0,255)			FcARF6	RGB(139,137,112)	UNKNOWN	SYBR	None
151	G7	Old leaves	RGB(0,0,255)			FcARF7	RGB(238,121,66)	UNKNOWN	SYBR	None
152	G8	Old leaves	RGB(0,0,255)			FcARF8	RGB(142,56,142)	UNKNOWN	SYBR	None
153	G9	Old leaves	RGB(0,0,255)			FcARF9	RGB(198,113,113)	UNKNOWN	SYBR	None
154	G10	Old leaves	RGB(0,0,255)			FcARF10	RGB(0,245,255)	UNKNOWN	SYBR	None
155	G11	Old leaves	RGB(0,0,255)			FcARF11	RGB(238,220,130)	UNKNOWN	SYBR	None
156	G12	Old leaves	RGB(0,0,255)			FcARF12	RGB(255,127,0)	UNKNOWN	SYBR	None
157	G13	Old leaves	RGB(0,0,255)			FcARF13	RGB(142,142,56)	UNKNOWN	SYBR	None
158	G14	Old leaves	RGB(0,0,255)			FcARF14	RGB(238,44,44)	UNKNOWN	SYBR	None
159	G15	Old leaves	RGB(0,0,255)			FcARF15	RGB(238,18,137)	UNKNOWN	SYBR	None
160	G16	Old leaves	RGB(0,0,255)			FcARF16	RGB(176,23,31)	UNKNOWN	SYBR	None
161	G17	Old leaves	RGB(0,0,255)			FcARF17	RGB(0,0,255)	UNKNOWN	SYBR	None
162	G18	Old leaves	RGB(0,0,255)			FcARF18	RGB(0,139,69)	UNKNOWN	SYBR	None
163	G19	Old leaves	RGB(0,0,255)			FcARF19	RGB(238,238,0)	UNKNOWN	SYBR	None
164	G20	Old leaves	RGB(0,0,255)			FcARF20	RGB(139,137,112)	UNKNOWN	SYBR	None
165	G21	Old leaves	RGB(0,0,255)			Actin	RGB(238,121,66)	UNKNOWN	SYBR	None
166	G22	Peel	RGB(139,137,112)			FcARF7	RGB(238,121,66)	UNKNOWN	SYBR	None
167	G23	Peel	RGB(139,137,112)			FcARF7	RGB(238,121,66)	UNKNOWN	SYBR	None
168	G24	Peel	RGB(139,137,112)			FcARF7	RGB(238,121,66)	UNKNOWN	SYBR	None
169	H1	Old leaves	RGB(0,0,255)			FcARF1	RGB(176,23,31)	UNKNOWN	SYBR	None
170	H2	Old leaves	RGB(0,0,255)			FcARF2	RGB(176,23,31)	UNKNOWN	SYBR	None
171	H3	Old leaves	RGB(0,0,255)			FcARF3	RGB(0,0,255)	UNKNOWN	SYBR	None
172	H4	Old leaves	RGB(0,0,255)			FcARF4	RGB(0,139,69)	UNKNOWN	SYBR	None
173	H5	Old leaves	RGB(0,0,255)			FcARF5	RGB(238,238,0)	UNKNOWN	SYBR	None
174	H6	Old leaves	RGB(0,0,255)			FcARF6	RGB(139,137,112)	UNKNOWN	SYBR	None
175	H7	Old leaves	RGB(0,0,255)			FcARF7	RGB(238,121,66)	UNKNOWN	SYBR	None
176	H8	Old leaves	RGB(0,0,255)			FcARF8	RGB(142,56,142)	UNKNOWN	SYBR	None
177	H9	Old leaves	RGB(0,0,255)			FcARF9	RGB(198,113,113)	UNKNOWN	SYBR	None
178	H10	Old leaves	RGB(0,0,255)			FcARF10	RGB(0,245,255)	UNKNOWN	SYBR	None
179	H11	Old leaves	RGB(0,0,255)			FcARF11	RGB(238,220,130)	UNKNOWN	SYBR	None
180	H12	Old leaves	RGB(0,0,255)			FcARF12	RGB(255,127,0)	UNKNOWN	SYBR	None
181	H13	Old leaves	RGB(0,0,255)			FcARF13	RGB(142,142,56)	UNKNOWN	SYBR	None
182	H14	Old leaves	RGB(0,0,255)			FcARF14	RGB(238,44,44)	UNKNOWN	SYBR	None
183	H15	Old leaves	RGB(0,0,255)			FcARF15	RGB(238,18,137)	UNKNOWN	SYBR	None
184	H16	Old leaves	RGB(0,0,255)			FcARF16	RGB(176,23,31)	UNKNOWN	SYBR	None
185	H17	Old leaves	RGB(0,0,255)			FcARF17	RGB(0,0,255)	UNKNOWN	SYBR	None
186	H18	Old leaves	RGB(0,0,255)			FcARF18	RGB(0,139,69)	UNKNOWN	SYBR	None
187	H19	Old leaves	RGB(0,0,255)			FcARF19	RGB(238,238,0)	UNKNOWN	SYBR	None
188	H20	Old leaves	RGB(0,0,255)			FcARF20	RGB(139,137,112)	UNKNOWN	SYBR	None
189	H21	Old leaves	RGB(0,0,255)			Actin	RGB(238,121,66)	UNKNOWN	SYBR	None
190	H22	Peel	RGB(139,137,112)			FcARF8	RGB(142,56,142)	UNKNOWN	SYBR	None
191	H23	Peel	RGB(139,137,112)			FcARF8	RGB(142,56,142)	UNKNOWN	SYBR	None
192	H24	Peel	RGB(139,137,112)			FcARF8	RGB(142,56,142)	UNKNOWN	SYBR	None
193	I1	Old leaves	RGB(0,0,255)			FcARF1	RGB(176,23,31)	UNKNOWN	SYBR	None
194	I2	Old leaves	RGB(0,0,255)			FcARF2	RGB(176,23,31)	UNKNOWN	SYBR	None
195	I3	Old leaves	RGB(0,0,255)			FcARF3	RGB(0,0,255)	UNKNOWN	SYBR	None
196	I4	Old leaves	RGB(0,0,255)			FcARF4	RGB(0,139,69)	UNKNOWN	SYBR	None
197	I5	Old leaves	RGB(0,0,255)			FcARF5	RGB(238,238,0)	UNKNOWN	SYBR	None
198	I6	Old leaves	RGB(0,0,255)			FcARF6	RGB(139,137,112)	UNKNOWN	SYBR	None
199	I7	Old leaves	RGB(0,0,255)			FcARF7	RGB(238,121,66)	UNKNOWN	SYBR	None
200	I8	Old leaves	RGB(0,0,255)			FcARF8	RGB(142,56,142)	UNKNOWN	SYBR	None
201	I9	Old leaves	RGB(0,0,255)			FcARF9	RGB(198,113,113)	UNKNOWN	SYBR	None
202	I10	Old leaves	RGB(0,0,255)			FcARF10	RGB(0,245,255)	UNKNOWN	SYBR	None
203	I11	Old leaves	RGB(0,0,255)			FcARF11	RGB(238,220,130)	UNKNOWN	SYBR	None
204	I12	Old leaves	RGB(0,0,255)			FcARF12	RGB(255,127,0)	UNKNOWN	SYBR	None
205	I13	Old leaves	RGB(0,0,255)			FcARF13	RGB(142,142,56)	UNKNOWN	SYBR	None
206	I14	Old leaves	RGB(0,0,255)			FcARF14	RGB(238,44,44)	UNKNOWN	SYBR	None
207	I15	Old leaves	RGB(0,0,255)			FcARF15	RGB(238,18,137)	UNKNOWN	SYBR	None
208	I16	Old leaves	RGB(0,0,255)			FcARF16	RGB(176,23,31)	UNKNOWN	SYBR	None
209	I17	Old leaves	RGB(0,0,255)			FcARF17	RGB(0,0,255)	UNKNOWN	SYBR	None
210	I18	Old leaves	RGB(0,0,255)			FcARF18	RGB(0,139,69)	UNKNOWN	SYBR	None
211	I19	Old leaves	RGB(0,0,255)			FcARF19	RGB(238,238,0)	UNKNOWN	SYBR	None
212	I20	Old leaves	RGB(0,0,255)			FcARF20	RGB(139,137,112)	UNKNOWN	SYBR	None
213	I21	Old leaves	RGB(0,0,255)			Actin	RGB(238,121,66)	UNKNOWN	SYBR	None
214	I22	Peel	RGB(139,137,112)			FcARF9	RGB(198,113,113)	UNKNOWN	SYBR	None
215	I23	Peel	RGB(139,137,112)			FcARF9	RGB(198,113,113)	UNKNOWN	SYBR	None
216	I24	Peel	RGB(139,137,112)			FcARF9	RGB(198,113,113)	UNKNOWN	SYBR	None
217	J1	New leaves	RGB(0,139,69)			FcARF1	RGB(176,23,31)	UNKNOWN	SYBR	None
218	J2	New leaves	RGB(0,139,69)			FcARF2	RGB(176,23,31)	UNKNOWN	SYBR	None
219	J3	New leaves	RGB(0,139,69)			FcARF3	RGB(0,0,255)	UNKNOWN	SYBR	None
220	J4	New leaves	RGB(0,139,69)			FcARF4	RGB(0,139,69)	UNKNOWN	SYBR	None
221	J5	New leaves	RGB(0,139,69)			FcARF5	RGB(238,238,0)	UNKNOWN	SYBR	None
222	J6	New leaves	RGB(0,139,69)			FcARF6	RGB(139,137,112)	UNKNOWN	SYBR	None
223	J7	New leaves	RGB(0,139,69)			FcARF7	RGB(238,121,66)	UNKNOWN	SYBR	None
224	J8	New leaves	RGB(0,139,69)			FcARF8	RGB(142,56,142)	UNKNOWN	SYBR	None
225	J9	New leaves	RGB(0,139,69)			FcARF9	RGB(198,113,113)	UNKNOWN	SYBR	None
226	J10	New leaves	RGB(0,139,69)			FcARF10	RGB(0,245,255)	UNKNOWN	SYBR	None
227	J11	New leaves	RGB(0,139,69)			FcARF11	RGB(238,220,130)	UNKNOWN	SYBR	None
228	J12	New leaves	RGB(0,139,69)			FcARF12	RGB(255,127,0)	UNKNOWN	SYBR	None
229	J13	New leaves	RGB(0,139,69)			FcARF13	RGB(142,142,56)	UNKNOWN	SYBR	None
230	J14	New leaves	RGB(0,139,69)			FcARF14	RGB(238,44,44)	UNKNOWN	SYBR	None
231	J15	New leaves	RGB(0,139,69)			FcARF15	RGB(238,18,137)	UNKNOWN	SYBR	None
232	J16	New leaves	RGB(0,139,69)			FcARF16	RGB(176,23,31)	UNKNOWN	SYBR	None
233	J17	New leaves	RGB(0,139,69)			FcARF17	RGB(0,0,255)	UNKNOWN	SYBR	None
234	J18	New leaves	RGB(0,139,69)			FcARF18	RGB(0,139,69)	UNKNOWN	SYBR	None
235	J19	New leaves	RGB(0,139,69)			FcARF19	RGB(238,238,0)	UNKNOWN	SYBR	None
236	J20	New leaves	RGB(0,139,69)			FcARF20	RGB(139,137,112)	UNKNOWN	SYBR	None
237	J21	New leaves	RGB(0,139,69)			Actin	RGB(238,121,66)	UNKNOWN	SYBR	None
238	J22	Peel	RGB(139,137,112)			FcARF10	RGB(0,245,255)	UNKNOWN	SYBR	None
239	J23	Peel	RGB(139,137,112)			FcARF10	RGB(0,245,255)	UNKNOWN	SYBR	None
240	J24	Peel	RGB(139,137,112)			FcARF10	RGB(0,245,255)	UNKNOWN	SYBR	None
241	K1	New leaves	RGB(0,139,69)			FcARF1	RGB(176,23,31)	UNKNOWN	SYBR	None
242	K2	New leaves	RGB(0,139,69)			FcARF2	RGB(176,23,31)	UNKNOWN	SYBR	None
243	K3	New leaves	RGB(0,139,69)			FcARF3	RGB(0,0,255)	UNKNOWN	SYBR	None
244	K4	New leaves	RGB(0,139,69)			FcARF4	RGB(0,139,69)	UNKNOWN	SYBR	None
245	K5	New leaves	RGB(0,139,69)			FcARF5	RGB(238,238,0)	UNKNOWN	SYBR	None
246	K6	New leaves	RGB(0,139,69)			FcARF6	RGB(139,137,112)	UNKNOWN	SYBR	None
247	K7	New leaves	RGB(0,139,69)			FcARF7	RGB(238,121,66)	UNKNOWN	SYBR	None
248	K8	New leaves	RGB(0,139,69)			FcARF8	RGB(142,56,142)	UNKNOWN	SYBR	None
249	K9	New leaves	RGB(0,139,69)			FcARF9	RGB(198,113,113)	UNKNOWN	SYBR	None
250	K10	New leaves	RGB(0,139,69)			FcARF10	RGB(0,245,255)	UNKNOWN	SYBR	None
251	K11	New leaves	RGB(0,139,69)			FcARF11	RGB(238,220,130)	UNKNOWN	SYBR	None
252	K12	New leaves	RGB(0,139,69)			FcARF12	RGB(255,127,0)	UNKNOWN	SYBR	None
253	K13	New leaves	RGB(0,139,69)			FcARF13	RGB(142,142,56)	UNKNOWN	SYBR	None
254	K14	New leaves	RGB(0,139,69)			FcARF14	RGB(238,44,44)	UNKNOWN	SYBR	None
255	K15	New leaves	RGB(0,139,69)			FcARF15	RGB(238,18,137)	UNKNOWN	SYBR	None
256	K16	New leaves	RGB(0,139,69)			FcARF16	RGB(176,23,31)	UNKNOWN	SYBR	None
257	K17	New leaves	RGB(0,139,69)			FcARF17	RGB(0,0,255)	UNKNOWN	SYBR	None
258	K18	New leaves	RGB(0,139,69)			FcARF18	RGB(0,139,69)	UNKNOWN	SYBR	None
259	K19	New leaves	RGB(0,139,69)			FcARF19	RGB(238,238,0)	UNKNOWN	SYBR	None
260	K20	New leaves	RGB(0,139,69)			FcARF20	RGB(139,137,112)	UNKNOWN	SYBR	None
261	K21	New leaves	RGB(0,139,69)			Actin	RGB(238,121,66)	UNKNOWN	SYBR	None
262	K22	Peel	RGB(139,137,112)			FcARF11	RGB(238,220,130)	UNKNOWN	SYBR	None
263	K23	Peel	RGB(139,137,112)			FcARF11	RGB(238,220,130)	UNKNOWN	SYBR	None
264	K24	Peel	RGB(139,137,112)			FcARF11	RGB(238,220,130)	UNKNOWN	SYBR	None
265	L1	New leaves	RGB(0,139,69)			FcARF1	RGB(176,23,31)	UNKNOWN	SYBR	None
266	L2	New leaves	RGB(0,139,69)			FcARF2	RGB(176,23,31)	UNKNOWN	SYBR	None
267	L3	New leaves	RGB(0,139,69)			FcARF3	RGB(0,0,255)	UNKNOWN	SYBR	None
268	L4	New leaves	RGB(0,139,69)			FcARF4	RGB(0,139,69)	UNKNOWN	SYBR	None
269	L5	New leaves	RGB(0,139,69)			FcARF5	RGB(238,238,0)	UNKNOWN	SYBR	None
270	L6	New leaves	RGB(0,139,69)			FcARF6	RGB(139,137,112)	UNKNOWN	SYBR	None
271	L7	New leaves	RGB(0,139,69)			FcARF7	RGB(238,121,66)	UNKNOWN	SYBR	None
272	L8	New leaves	RGB(0,139,69)			FcARF8	RGB(142,56,142)	UNKNOWN	SYBR	None
273	L9	New leaves	RGB(0,139,69)			FcARF9	RGB(198,113,113)	UNKNOWN	SYBR	None
274	L10	New leaves	RGB(0,139,69)			FcARF10	RGB(0,245,255)	UNKNOWN	SYBR	None
275	L11	New leaves	RGB(0,139,69)			FcARF11	RGB(238,220,130)	UNKNOWN	SYBR	None
276	L12	New leaves	RGB(0,139,69)			FcARF12	RGB(255,127,0)	UNKNOWN	SYBR	None
277	L13	New leaves	RGB(0,139,69)			FcARF13	RGB(142,142,56)	UNKNOWN	SYBR	None
278	L14	New leaves	RGB(0,139,69)			FcARF14	RGB(238,44,44)	UNKNOWN	SYBR	None
279	L15	New leaves	RGB(0,139,69)			FcARF15	RGB(238,18,137)	UNKNOWN	SYBR	None
280	L16	New leaves	RGB(0,139,69)			FcARF16	RGB(176,23,31)	UNKNOWN	SYBR	None
281	L17	New leaves	RGB(0,139,69)			FcARF17	RGB(0,0,255)	UNKNOWN	SYBR	None
282	L18	New leaves	RGB(0,139,69)			FcARF18	RGB(0,139,69)	UNKNOWN	SYBR	None
283	L19	New leaves	RGB(0,139,69)			FcARF19	RGB(238,238,0)	UNKNOWN	SYBR	None
284	L20	New leaves	RGB(0,139,69)			FcARF20	RGB(139,137,112)	UNKNOWN	SYBR	None
285	L21	New leaves	RGB(0,139,69)			Actin	RGB(238,121,66)	UNKNOWN	SYBR	None
286	L22	Peel	RGB(139,137,112)			FcARF12	RGB(255,127,0)	UNKNOWN	SYBR	None
287	L23	Peel	RGB(139,137,112)			FcARF12	RGB(255,127,0)	UNKNOWN	SYBR	None
288	L24	Peel	RGB(139,137,112)			FcARF12	RGB(255,127,0)	UNKNOWN	SYBR	None
289	M1	Flower	RGB(255,127,0)			FcARF1	RGB(176,23,31)	UNKNOWN	SYBR	None
290	M2	Flower	RGB(255,127,0)			FcARF2	RGB(176,23,31)	UNKNOWN	SYBR	None
291	M3	Flower	RGB(255,127,0)			FcARF3	RGB(0,0,255)	UNKNOWN	SYBR	None
292	M4	Flower	RGB(255,127,0)			FcARF4	RGB(0,139,69)	UNKNOWN	SYBR	None
293	M5	Flower	RGB(255,127,0)			FcARF5	RGB(238,238,0)	UNKNOWN	SYBR	None
294	M6	Flower	RGB(255,127,0)			FcARF6	RGB(139,137,112)	UNKNOWN	SYBR	None
295	M7	Flower	RGB(255,127,0)			FcARF7	RGB(238,121,66)	UNKNOWN	SYBR	None
296	M8	Flower	RGB(255,127,0)			FcARF8	RGB(142,56,142)	UNKNOWN	SYBR	None
297	M9	Flower	RGB(255,127,0)			FcARF9	RGB(198,113,113)	UNKNOWN	SYBR	None
298	M10	Flower	RGB(255,127,0)			FcARF10	RGB(0,245,255)	UNKNOWN	SYBR	None
299	M11	Flower	RGB(255,127,0)			FcARF11	RGB(238,220,130)	UNKNOWN	SYBR	None
300	M12	Flower	RGB(255,127,0)			FcARF12	RGB(255,127,0)	UNKNOWN	SYBR	None
301	M13	Flower	RGB(255,127,0)			FcARF13	RGB(142,142,56)	UNKNOWN	SYBR	None
302	M14	Flower	RGB(255,127,0)			FcARF14	RGB(238,44,44)	UNKNOWN	SYBR	None
303	M15	Flower	RGB(255,127,0)			FcARF15	RGB(238,18,137)	UNKNOWN	SYBR	None
304	M16	Flower	RGB(255,127,0)			FcARF16	RGB(176,23,31)	UNKNOWN	SYBR	None
305	M17	Flower	RGB(255,127,0)			FcARF17	RGB(0,0,255)	UNKNOWN	SYBR	None
306	M18	Flower	RGB(255,127,0)			FcARF18	RGB(0,139,69)	UNKNOWN	SYBR	None
307	M19	Flower	RGB(255,127,0)			FcARF19	RGB(238,238,0)	UNKNOWN	SYBR	None
308	M20	Flower	RGB(255,127,0)			FcARF20	RGB(139,137,112)	UNKNOWN	SYBR	None
309	M21	Flower	RGB(255,127,0)			Actin	RGB(238,121,66)	UNKNOWN	SYBR	None
310	M22	Peel	RGB(139,137,112)			FcARF13	RGB(142,142,56)	UNKNOWN	SYBR	None
311	M23	Peel	RGB(139,137,112)			FcARF13	RGB(142,142,56)	UNKNOWN	SYBR	None
312	M24	Peel	RGB(139,137,112)			FcARF13	RGB(142,142,56)	UNKNOWN	SYBR	None
313	N1	Flower	RGB(255,127,0)			FcARF1	RGB(176,23,31)	UNKNOWN	SYBR	None
314	N2	Flower	RGB(255,127,0)			FcARF2	RGB(176,23,31)	UNKNOWN	SYBR	None
315	N3	Flower	RGB(255,127,0)			FcARF3	RGB(0,0,255)	UNKNOWN	SYBR	None
316	N4	Flower	RGB(255,127,0)			FcARF4	RGB(0,139,69)	UNKNOWN	SYBR	None
317	N5	Flower	RGB(255,127,0)			FcARF5	RGB(238,238,0)	UNKNOWN	SYBR	None
318	N6	Flower	RGB(255,127,0)			FcARF6	RGB(139,137,112)	UNKNOWN	SYBR	None
319	N7	Flower	RGB(255,127,0)			FcARF7	RGB(238,121,66)	UNKNOWN	SYBR	None
320	N8	Flower	RGB(255,127,0)			FcARF8	RGB(142,56,142)	UNKNOWN	SYBR	None
321	N9	Flower	RGB(255,127,0)			FcARF9	RGB(198,113,113)	UNKNOWN	SYBR	None
322	N10	Flower	RGB(255,127,0)			FcARF10	RGB(0,245,255)	UNKNOWN	SYBR	None
323	N11	Flower	RGB(255,127,0)			FcARF11	RGB(238,220,130)	UNKNOWN	SYBR	None
324	N12	Flower	RGB(255,127,0)			FcARF12	RGB(255,127,0)	UNKNOWN	SYBR	None
325	N13	Flower	RGB(255,127,0)			FcARF13	RGB(142,142,56)	UNKNOWN	SYBR	None
326	N14	Flower	RGB(255,127,0)			FcARF14	RGB(238,44,44)	UNKNOWN	SYBR	None
327	N15	Flower	RGB(255,127,0)			FcARF15	RGB(238,18,137)	UNKNOWN	SYBR	None
328	N16	Flower	RGB(255,127,0)			FcARF16	RGB(176,23,31)	UNKNOWN	SYBR	None
329	N17	Flower	RGB(255,127,0)			FcARF17	RGB(0,0,255)	UNKNOWN	SYBR	None
330	N18	Flower	RGB(255,127,0)			FcARF18	RGB(0,139,69)	UNKNOWN	SYBR	None
331	N19	Flower	RGB(255,127,0)			FcARF19	RGB(238,238,0)	UNKNOWN	SYBR	None
332	N20	Flower	RGB(255,127,0)			FcARF20	RGB(139,137,112)	UNKNOWN	SYBR	None
333	N21	Flower	RGB(255,127,0)			Actin	RGB(238,121,66)	UNKNOWN	SYBR	None
334	N22	Peel	RGB(139,137,112)			FcARF14	RGB(238,44,44)	UNKNOWN	SYBR	None
335	N23	Peel	RGB(139,137,112)			FcARF14	RGB(238,44,44)	UNKNOWN	SYBR	None
336	N24	Peel	RGB(139,137,112)			FcARF14	RGB(238,44,44)	UNKNOWN	SYBR	None
337	O1	Flower	RGB(255,127,0)			FcARF1	RGB(176,23,31)	UNKNOWN	SYBR	None
338	O2	Flower	RGB(255,127,0)			FcARF2	RGB(176,23,31)	UNKNOWN	SYBR	None
339	O3	Flower	RGB(255,127,0)			FcARF3	RGB(0,0,255)	UNKNOWN	SYBR	None
340	O4	Flower	RGB(255,127,0)			FcARF4	RGB(0,139,69)	UNKNOWN	SYBR	None
341	O5	Flower	RGB(255,127,0)			FcARF5	RGB(238,238,0)	UNKNOWN	SYBR	None
342	O6	Flower	RGB(255,127,0)			FcARF6	RGB(139,137,112)	UNKNOWN	SYBR	None
343	O7	Flower	RGB(255,127,0)			FcARF7	RGB(238,121,66)	UNKNOWN	SYBR	None
344	O8	Flower	RGB(255,127,0)			FcARF8	RGB(142,56,142)	UNKNOWN	SYBR	None
345	O9	Flower	RGB(255,127,0)			FcARF9	RGB(198,113,113)	UNKNOWN	SYBR	None
346	O10	Flower	RGB(255,127,0)			FcARF10	RGB(0,245,255)	UNKNOWN	SYBR	None
347	O11	Flower	RGB(255,127,0)			FcARF11	RGB(238,220,130)	UNKNOWN	SYBR	None
348	O12	Flower	RGB(255,127,0)			FcARF12	RGB(255,127,0)	UNKNOWN	SYBR	None
349	O13	Flower	RGB(255,127,0)			FcARF13	RGB(142,142,56)	UNKNOWN	SYBR	None
350	O14	Flower	RGB(255,127,0)			FcARF14	RGB(238,44,44)	UNKNOWN	SYBR	None
351	O15	Flower	RGB(255,127,0)			FcARF15	RGB(238,18,137)	UNKNOWN	SYBR	None
352	O16	Flower	RGB(255,127,0)			FcARF16	RGB(176,23,31)	UNKNOWN	SYBR	None
353	O17	Flower	RGB(255,127,0)			FcARF17	RGB(0,0,255)	UNKNOWN	SYBR	None
354	O18	Flower	RGB(255,127,0)			FcARF18	RGB(0,139,69)	UNKNOWN	SYBR	None
355	O19	Flower	RGB(255,127,0)			FcARF19	RGB(238,238,0)	UNKNOWN	SYBR	None
356	O20	Flower	RGB(255,127,0)			FcARF20	RGB(139,137,112)	UNKNOWN	SYBR	None
357	O21	Flower	RGB(255,127,0)			Actin	RGB(238,121,66)	UNKNOWN	SYBR	None
358	O22	Peel	RGB(139,137,112)			FcARF15	RGB(238,18,137)	UNKNOWN	SYBR	None
359	O23	Peel	RGB(139,137,112)			FcARF15	RGB(238,18,137)	UNKNOWN	SYBR	None
360	O24	Peel	RGB(139,137,112)			FcARF15	RGB(238,18,137)	UNKNOWN	SYBR	None
361	P1	Peel	RGB(139,137,112)			FcARF17	RGB(0,0,255)	UNKNOWN	SYBR	None
362	P2	Peel	RGB(139,137,112)			FcARF17	RGB(0,0,255)	UNKNOWN	SYBR	None
363	P3	Peel	RGB(139,137,112)			FcARF17	RGB(0,0,255)	UNKNOWN	SYBR	None
364	P4	Peel	RGB(139,137,112)			FcARF18	RGB(0,139,69)	UNKNOWN	SYBR	None
365	P5	Peel	RGB(139,137,112)			FcARF18	RGB(0,139,69)	UNKNOWN	SYBR	None
366	P6	Peel	RGB(139,137,112)			FcARF18	RGB(0,139,69)	UNKNOWN	SYBR	None
367	P7	Peel	RGB(139,137,112)			FcARF19	RGB(238,238,0)	UNKNOWN	SYBR	None
368	P8	Peel	RGB(139,137,112)			FcARF19	RGB(238,238,0)	UNKNOWN	SYBR	None
369	P9	Peel	RGB(139,137,112)			FcARF19	RGB(238,238,0)	UNKNOWN	SYBR	None
370	P10	Peel	RGB(139,137,112)			FcARF20	RGB(139,137,112)	UNKNOWN	SYBR	None
371	P11	Peel	RGB(139,137,112)			FcARF20	RGB(139,137,112)	UNKNOWN	SYBR	None
372	P12	Peel	RGB(139,137,112)			FcARF20	RGB(139,137,112)	UNKNOWN	SYBR	None
373	P13	Peel	RGB(139,137,112)			Actin	RGB(238,121,66)	UNKNOWN	SYBR	None
374	P14	Peel	RGB(139,137,112)			Actin	RGB(238,121,66)	UNKNOWN	SYBR	None
375	P15	Peel	RGB(139,137,112)			Actin	RGB(238,121,66)	UNKNOWN	SYBR	None
376	P16
377	P17
378	P18
379	P19
380	P20
381	P21
382	P22	Peel	RGB(139,137,112)			FcARF16	RGB(176,23,31)	UNKNOWN	SYBR	None
383	P23	Peel	RGB(139,137,112)			FcARF16	RGB(176,23,31)	UNKNOWN	SYBR	None
384	P24	Peel	RGB(139,137,112)			FcARF16	RGB(176,23,31)	UNKNOWN	SYBR	None

## Sheet: Amplification Data
Block Type	384-Well Block
Calibration Background is expired	No
Calibration Background performed on	12-23-2020
Calibration Pure Dye FAM is expired	No
Calibration Pure Dye FAM performed on	12-23-2020
Calibration Pure Dye NED is expired	No
Calibration Pure Dye NED performed on	12-23-2020
Calibration Pure Dye ROX is expired	No
Calibration Pure Dye ROX performed on	12-23-2020
Calibration Pure Dye SYBR is expired	No
Calibration Pure Dye SYBR performed on	12-23-2020
Calibration Pure Dye TAMRA is expired	No
Calibration Pure Dye TAMRA performed on	12-23-2020
Calibration Pure Dye VIC is expired	No
Calibration Pure Dye VIC performed on	12-23-2020
Calibration RNaseP is expired	No
Calibration RNaseP performed on	11-03-2016
Calibration ROI is expired	No
Calibration ROI performed on	12-23-2020
Calibration Uniformity is expired	No
Calibration Uniformity performed on	12-23-2020
Chemistry	SYBR_GREEN
Date Created	2021-12-16 20:20:14 PM CST
Experiment Barcode
Experiment Comment
Experiment File Name	C:\Users\zgnyd\Documents\WeChat Files\wxid_3g6h1irk34e722\FileStorage\File\2022-04\2021-12-16 tissues.eds
Experiment Name	2021-12-16 202009
Experiment Run End Time	2010-01-05 03:43:04 AM CST
Experiment Type	Comparative Cт (ΔΔCт)
Instrument Name	278861484
Instrument Serial Number	278861484
Instrument Type	QuantStudio(TM) 6 Flex System
Passive Reference	ROX
Quantification Cycle Method	Ct
Signal Smoothing On	true
Stage/ Cycle where Analysis is performed	Stage 2, Step 2
User Name
Well	Cycle	Target Name	Rn	Delta Rn
1	1	FcARF1	4.22716	-0.00931042
1	2	FcARF1	4.29798	0.057354
1	3	FcARF1	4.37559	0.130814
1	4	FcARF1	4.2379	-0.0110189
1	5	FcARF1	4.1561	-0.0969691
1	6	FcARF1	4.14667	-0.110551
1	7	FcARF1	4.1842	-0.077171
1	8	FcARF1	4.28784	0.022315
1	9	FcARF1	4.4539	0.184232
1	10	FcARF1	4.49975	0.225935
1	11	FcARF1	4.35517	0.0772018
1	12	FcARF1	4.1768	-0.10532
1	13	FcARF1	4.17149	-0.114781
1	14	FcARF1	4.10574	-0.18468
1	15	FcARF1	4.16775	-0.126811
1	16	FcARF1	4.23203	-0.0666825
1	17	FcARF1	4.31875	0.0158844
1	18	FcARF1	4.3128	0.00578941
1	19	FcARF1	4.4315	0.120335
1	20	FcARF1	4.46595	0.150637
1	21	FcARF1	4.42591	0.106448
1	22	FcARF1	4.178	-0.145606
1	23	FcARF1	4.25749	-0.0702715
1	24	FcARF1	4.44979	0.117882
1	25	FcARF1	4.53103	0.194975
1	26	FcARF1	4.46507	0.124867
1	27	FcARF1	4.67258	0.328225
1	28	FcARF1	4.77788	0.429377
1	29	FcARF1	4.77939	0.426733
1	30	FcARF1	4.63115	0.274341
1	31	FcARF1	4.51906	0.158107
1	32	FcARF1	4.86864	0.503538
1	33	FcARF1	5.12459	0.755337
1	34	FcARF1	5.0153	0.641895
1	35	FcARF1	4.97697	0.599418
1	36	FcARF1	4.78761	0.405909
1	37	FcARF1	4.76838	0.382528
1	38	FcARF1	4.78983	0.399826
1	39	FcARF1	5.01208	0.617934
1	40	FcARF1	5.13139	0.733094
2	1	FcARF2	0.0958033	-0.0198881
2	2	FcARF2	0.100371	-0.0161288
2	3	FcARF2	0.109921	-0.00738667
2	4	FcARF2	0.116331	-0.00178525
2	5	FcARF2	0.121047	0.00212239
2	6	FcARF2	0.123836	0.00410343
2	7	FcARF2	0.123488	0.00294726
2	8	FcARF2	0.123132	0.00178288
2	9	FcARF2	0.122722	0.000563982
2	10	FcARF2	0.122778	-0.000188135
2	11	FcARF2	0.123271	-0.000503433
2	12	FcARF2	0.125448	0.000865668
2	13	FcARF2	0.127815	0.00242432
2	14	FcARF2	0.127498	0.00129887
2	15	FcARF2	0.126193	-0.000814233
2	16	FcARF2	0.125199	-0.00261709
2	17	FcARF2	0.127038	-0.0015857
2	18	FcARF2	0.127326	-0.00210655
2	19	FcARF2	0.129276	-0.000964183
2	20	FcARF2	0.13103	-1.93864e-05
2	21	FcARF2	0.133719	0.00186184
2	22	FcARF2	0.139403	0.00673739
2	23	FcARF2	0.153321	0.0198474
2	24	FcARF2	0.179797	0.0455147
2	25	FcARF2	0.231424	0.0963337
2	26	FcARF2	0.333739	0.197841
2	27	FcARF2	0.521257	0.38455
2	28	FcARF2	0.852076	0.714561
2	29	FcARF2	1.37894	1.24062
2	30	FcARF2	2.09269	1.95356
2	31	FcARF2	2.88224	2.7423
2	32	FcARF2	3.59572	3.45497
2	33	FcARF2	4.1295	3.98795
2	34	FcARF2	4.48867	4.34631
2	35	FcARF2	4.73618	4.593
2	36	FcARF2	4.91653	4.77255
2	37	FcARF2	5.03274	4.88795
2	38	FcARF2	5.13	4.9844
2	39	FcARF2	5.21384	5.06744
2	40	FcARF2	5.2576	5.11038
3	1	FcARF3	0.219127	-0.0259792
3	2	FcARF3	0.219745	-0.0258137
3	3	FcARF3	0.227058	-0.0189526
3	4	FcARF3	0.23398	-0.0124823
3	5	FcARF3	0.245855	-0.00105982
3	6	FcARF3	0.248437	0.00107049
3	7	FcARF3	0.248012	0.000193219
3	8	FcARF3	0.248129	-0.000141787
3	9	FcARF3	0.256702	0.00797976
3	10	FcARF3	0.256524	0.00734986
3	11	FcARF3	0.256395	0.00676839
3	12	FcARF3	0.258681	0.00860219
3	13	FcARF3	0.261315	0.0107842
3	14	FcARF3	0.260052	0.00906955
3	15	FcARF3	0.256116	0.00468113
3	16	FcARF3	0.254435	0.00254836
3	17	FcARF3	0.254073	0.00173413
3	18	FcARF3	0.256409	0.00361868
3	19	FcARF3	0.247324	-0.00591842
3	20	FcARF3	0.243962	-0.00973219
3	21	FcARF3	0.252895	-0.00125143
3	22	FcARF3	0.253691	-0.000907897
3	23	FcARF3	0.252122	-0.00292846
3	24	FcARF3	0.249498	-0.00600423
3	25	FcARF3	0.250934	-0.00502088
3	26	FcARF3	0.260528	0.00412185
3	27	FcARF3	0.282967	0.0261084
3	28	FcARF3	0.309832	0.0525213
3	29	FcARF3	0.346414	0.088651
3	30	FcARF3	0.425543	0.167329
3	31	FcARF3	0.528946	0.270279
3	32	FcARF3	0.652889	0.393771
3	33	FcARF3	0.757504	0.497933
3	34	FcARF3	0.834977	0.574954
3	35	FcARF3	0.901187	0.640712
3	36	FcARF3	0.953983	0.693057
3	37	FcARF3	1.00771	0.746328
3	38	FcARF3	1.05522	0.793389
3	39	FcARF3	1.10077	0.838491
3	40	FcARF3	1.14418	0.881449
4	1	FcARF4	0.0792879	-0.015502
4	2	FcARF4	0.0812783	-0.0137163
4	3	FcARF4	0.0868502	-0.008349
4	4	FcARF4	0.0916405	-0.00376327
4	5	FcARF4	0.095871	0.00026265
4	6	FcARF4	0.100355	0.0045417
4	7	FcARF4	0.101476	0.00545887
4	8	FcARF4	0.0985277	0.0023055
4	9	FcARF4	0.0975942	0.00116741
4	10	FcARF4	0.097881	0.00124954
4	11	FcARF4	0.0979631	0.00112704
4	12	FcARF4	0.0990656	0.00202488
4	13	FcARF4	0.0985779	0.00133266
4	14	FcARF4	0.0978527	0.000402773
4	15	FcARF4	0.0965086	-0.00114588
4	16	FcARF4	0.0958376	-0.00202154
4	17	FcARF4	0.0961349	-0.00192881
4	18	FcARF4	0.0957791	-0.00248926
4	19	FcARF4	0.0968104	-0.00166254
4	20	FcARF4	0.0989739	0.000296282
4	21	FcARF4	0.100073	0.001191
4	22	FcARF4	0.10734	0.00825334
4	23	FcARF4	0.121108	0.0218163
4	24	FcARF4	0.145114	0.0456176
4	25	FcARF4	0.195287	0.0955863
4	26	FcARF4	0.295253	0.195348
4	27	FcARF4	0.481918	0.381808
4	28	FcARF4	0.819313	0.718998
4	29	FcARF4	1.37964	1.27912
4	30	FcARF4	2.18617	2.08544
4	31	FcARF4	3.10831	3.00739
4	32	FcARF4	3.91006	3.80892
4	33	FcARF4	4.43662	4.33528
4	34	FcARF4	4.75447	4.65293
4	35	FcARF4	4.96319	4.86145
4	36	FcARF4	5.0929	4.99095
4	37	FcARF4	5.18911	5.08696
4	38	FcARF4	5.23773	5.13537
4	39	FcARF4	5.26699	5.16442
4	40	FcARF4	5.28143	5.17866
5	1	FcARF5	0.0399259	-0.0207507
5	2	FcARF5	0.0436616	-0.0177089
5	3	FcARF5	0.0518634	-0.010201
5	4	FcARF5	0.0576888	-0.0050695
5	5	FcARF5	0.06202	-0.00143228
5	6	FcARF5	0.0667376	0.00259147
5	7	FcARF5	0.0697952	0.00495519
5	8	FcARF5	0.0704643	0.00493041
5	9	FcARF5	0.0703385	0.00411071
5	10	FcARF5	0.069249	0.00232728
5	11	FcARF5	0.0685523	0.000936673
5	12	FcARF5	0.0683176	8.05985e-06
5	13	FcARF5	0.0705351	0.00153169
5	14	FcARF5	0.071444	0.00174665
5	15	FcARF5	0.0719446	0.00155341
5	16	FcARF5	0.0722201	0.001135
5	17	FcARF5	0.0722486	0.000469589
5	18	FcARF5	0.0724301	-4.28128e-05
5	19	FcARF5	0.071876	-0.00129082
5	20	FcARF5	0.0711104	-0.00275032
5	21	FcARF5	0.0713549	-0.00319971
5	22	FcARF5	0.0723322	-0.0029163
5	23	FcARF5	0.0749603	-0.000982135
5	24	FcARF5	0.078225	0.00158873
5	25	FcARF5	0.0851718	0.00784161
5	26	FcARF5	0.0995443	0.0215202
5	27	FcARF5	0.127517	0.0487988
5	28	FcARF5	0.180948	0.101536
5	29	FcARF5	0.285256	0.20515
5	30	FcARF5	0.475146	0.394346
5	31	FcARF5	0.794403	0.712909
5	32	FcARF5	1.21961	1.13743
5	33	FcARF5	1.60796	1.52508
5	34	FcARF5	1.91786	1.83428
5	35	FcARF5	2.26882	2.18455
5	36	FcARF5	2.60247	2.51751
5	37	FcARF5	2.88733	2.80167
5	38	FcARF5	3.11792	3.03157
5	39	FcARF5	3.29497	3.20793
5	40	FcARF5	3.43247	3.34473
6	1	FcARF6	0.0555194	-0.0185842
6	2	FcARF6	0.0587261	-0.016039
6	3	FcARF6	0.0669267	-0.00849994
6	4	FcARF6	0.072305	-0.00378313
6	5	FcARF6	0.074486	-0.00226364
6	6	FcARF6	0.0772893	-0.000121823
6	7	FcARF6	0.0795692	0.00149656
6	8	FcARF6	0.0821688	0.00343463
6	9	FcARF6	0.081731	0.00233528
6	10	FcARF6	0.0822393	0.00218204
6	11	FcARF6	0.0822177	0.00149901
6	12	FcARF6	0.0838098	0.00242959
6	13	FcARF6	0.0858062	0.00376445
6	14	FcARF6	0.0862116	0.00350829
6	15	FcARF6	0.0850251	0.00166029
6	16	FcARF6	0.0857885	0.0017622
6	17	FcARF6	0.0859444	0.00125663
6	18	FcARF6	0.0859775	0.0006282
6	19	FcARF6	0.0863289	0.000318084
6	20	FcARF6	0.0860051	-0.000667232
6	21	FcARF6	0.0851102	-0.0022237
6	22	FcARF6	0.0862593	-0.00173612
6	23	FcARF6	0.0854834	-0.00317355
6	24	FcARF6	0.086558	-0.00276038
6	25	FcARF6	0.0889342	-0.00104573
6	26	FcARF6	0.0918575	0.00121605
6	27	FcARF6	0.101958	0.0106548
6	28	FcARF6	0.120127	0.028163
6	29	FcARF6	0.155038	0.0624122
6	30	FcARF6	0.220178	0.12689
6	31	FcARF6	0.345469	0.25152
6	32	FcARF6	0.574763	0.480153
6	33	FcARF6	0.941699	0.846427
6	34	FcARF6	1.43966	1.34373
6	35	FcARF6	2.04061	1.94402
6	36	FcARF6	2.66674	2.56948
6	37	FcARF6	3.215	3.11708
6	38	FcARF6	3.63603	3.53745
6	39	FcARF6	3.94745	3.84821
6	40	FcARF6	4.13353	4.03363
7	1	FcARF7	0.0189206	-0.0134956
7	2	FcARF7	0.0215387	-0.0117195
7	3	FcARF7	0.0286808	-0.00541944
7	4	FcARF7	0.0334478	-0.00149443
7	5	FcARF7	0.0363642	0.000579866
7	6	FcARF7	0.0385789	0.00195262
7	7	FcARF7	0.0410946	0.00362624
7	8	FcARF7	0.0400616	0.0017512
7	9	FcARF7	0.0394248	0.000272446
7	10	FcARF7	0.0409098	0.0009154
7	11	FcARF7	0.0413825	0.000546104
7	12	FcARF7	0.0424316	0.000753189
7	13	FcARF7	0.0425606	4.01233e-05
7	14	FcARF7	0.0425974	-0.000765043
7	15	FcARF7	0.0441889	-1.55558e-05
7	16	FcARF7	0.0449795	-6.70323e-05
7	17	FcARF7	0.0451031	-0.000785474
7	18	FcARF7	0.0451869	-0.00154363
7	19	FcARF7	0.0464314	-0.00114122
7	20	FcARF7	0.0492092	0.000794637
7	21	FcARF7	0.0547131	0.00545652
7	22	FcARF7	0.0658523	0.0157536
7	23	FcARF7	0.087229	0.0362883
7	24	FcARF7	0.127665	0.0758823
7	25	FcARF7	0.204818	0.152193
7	26	FcARF7	0.347915	0.294449
7	27	FcARF7	0.602317	0.548009
7	28	FcARF7	1.01102	0.955869
7	29	FcARF7	1.57567	1.51968
7	30	FcARF7	2.16423	2.10739
7	31	FcARF7	2.61992	2.56224
7	32	FcARF7	2.95659	2.89807
7	33	FcARF7	3.24515	3.18579
7	34	FcARF7	3.47476	3.41456
7	35	FcARF7	3.64427	3.58323
7	36	FcARF7	3.76958	3.70769
7	37	FcARF7	3.86182	3.79909
7	38	FcARF7	3.93017	3.8666
7	39	FcARF7	3.96877	3.90436
7	40	FcARF7	3.99863	3.93338
8	1	FcARF8	0.152733	-0.0178431
8	2	FcARF8	0.156087	-0.0153903
8	3	FcARF8	0.165049	-0.00733011
8	4	FcARF8	0.172182	-0.00109943
8	5	FcARF8	0.174837	0.000653562
8	6	FcARF8	0.175792	0.000706626
8	7	FcARF8	0.177601	0.00161421
8	8	FcARF8	0.178377	0.0014884
8	9	FcARF8	0.179213	0.001422
8	10	FcARF8	0.180756	0.00206377
8	11	FcARF8	0.182187	0.00259245
8	12	FcARF8	0.182319	0.00182337
8	13	FcARF8	0.18308	0.00168161
8	14	FcARF8	0.182825	0.000525149
8	15	FcARF8	0.1842	0.000998038
8	16	FcARF8	0.184394	0.000290308
8	17	FcARF8	0.184103	-0.000902708
8	18	FcARF8	0.183621	-0.00228647
8	19	FcARF8	0.183733	-0.00307585
8	20	FcARF8	0.186169	-0.00154192
8	21	FcARF8	0.188112	-0.000500435
8	22	FcARF8	0.190392	0.000877432
8	23	FcARF8	0.198018	0.00760112
8	24	FcARF8	0.216915	0.0255969
8	25	FcARF8	0.251519	0.0592986
8	26	FcARF8	0.315205	0.122083
8	27	FcARF8	0.439264	0.24524
8	28	FcARF8	0.663917	0.468992
8	29	FcARF8	1.05459	0.858765
8	30	FcARF8	1.66529	1.46856
8	31	FcARF8	2.47384	2.27621
8	32	FcARF8	3.32401	3.12547
8	33	FcARF8	3.99966	3.80022
8	34	FcARF8	4.46409	4.26375
8	35	FcARF8	4.7967	4.59546
8	36	FcARF8	5.03411	4.83197
8	37	FcARF8	5.20553	5.00249
8	38	FcARF8	5.33606	5.13211
8	39	FcARF8	5.43056	5.22571
8	40	FcARF8	5.48563	5.27988
9	1	FcARF9	0.244577	-0.0260613
9	2	FcARF9	0.24853	-0.0225103
9	3	FcARF9	0.25899	-0.0124529
9	4	FcARF9	0.267051	-0.0047939
9	5	FcARF9	0.271328	-0.000919096
9	6	FcARF9	0.27442	0.00177142
9	7	FcARF9	0.276152	0.0031011
9	8	FcARF9	0.277742	0.00428883
9	9	FcARF9	0.278831	0.00497571
9	10	FcARF9	0.278214	0.003957
9	11	FcARF9	0.278158	0.00349902
9	12	FcARF9	0.278787	0.00372592
9	13	FcARF9	0.278668	0.00320396
9	14	FcARF9	0.27824	0.0023747
9	15	FcARF9	0.276357	8.93585e-05
9	16	FcARF9	0.275747	-0.000923273
9	17	FcARF9	0.275961	-0.00111133
9	18	FcARF9	0.275413	-0.00206102
9	19	FcARF9	0.275559	-0.00231683
9	20	FcARF9	0.276335	-0.00194308
9	21	FcARF9	0.276279	-0.00240175
9	22	FcARF9	0.27684	-0.00224273
9	23	FcARF9	0.279664	0.000178935
9	24	FcARF9	0.283885	0.00399797
9	25	FcARF9	0.293961	0.0136718
9	26	FcARF9	0.314256	0.0335655
9	27	FcARF9	0.352134	0.0710408
9	28	FcARF9	0.425529	0.144034
9	29	FcARF9	0.56636	0.284462
9	30	FcARF9	0.813739	0.53144
9	31	FcARF9	1.21991	0.937212
9	32	FcARF9	1.80074	1.51763
9	33	FcARF9	2.45396	2.17046
9	34	FcARF9	3.00756	2.72365
9	35	FcARF9	3.37275	3.08844
9	36	FcARF9	3.65128	3.36657
9	37	FcARF9	3.89113	3.60601
9	38	FcARF9	4.08289	3.79737
9	39	FcARF9	4.22292	3.937
9	40	FcARF9	4.32804	4.04172
10	1	FcARF10	0.211643	0.00170186
10	2	FcARF10	0.212565	0.0020127
10	3	FcARF10	0.214875	0.00371127
10	4	FcARF10	0.210373	-0.00140305
10	5	FcARF10	0.209929	-0.0024576
10	6	FcARF10	0.21104	-0.00195871
10	7	FcARF10	0.21287	-0.000739677
10	8	FcARF10	0.21369	-0.000530985
10	9	FcARF10	0.216254	0.00142126
10	10	FcARF10	0.217204	0.00175989
10	11	FcARF10	0.217088	0.00103231
10	12	FcARF10	0.216828	0.000161074
10	13	FcARF10	0.217632	0.000353777
10	14	FcARF10	0.217556	-0.000333732
10	15	FcARF10	0.218477	-2.42489e-05
10	16	FcARF10	0.218467	-0.000645284
10	17	FcARF10	0.218979	-0.000745165
10	18	FcARF10	0.220219	-0.00011635
10	19	FcARF10	0.221462	0.000515222
10	20	FcARF10	0.228856	0.0072975
10	21	FcARF10	0.240013	0.0178427
10	22	FcARF10	0.264618	0.0418365
10	23	FcARF10	0.311452	0.0880594
10	24	FcARF10	0.397936	0.173932
10	25	FcARF10	0.56441	0.339794
10	26	FcARF10	0.870467	0.64524
10	27	FcARF10	1.37659	1.15075
10	28	FcARF10	2.11874	1.89229
10	29	FcARF10	3.0228	2.79574
10	30	FcARF10	3.8749	3.64722
10	31	FcARF10	4.50788	4.2796
10	32	FcARF10	4.92912	4.70022
10	33	FcARF10	5.21981	4.9903
10	34	FcARF10	5.43013	5.20001
10	35	FcARF10	5.58058	5.34985
10	36	FcARF10	5.70009	5.46875
10	37	FcARF10	5.79283	5.56088
10	38	FcARF10	5.85552	5.62295
10	39	FcARF10	5.90821	5.67503
10	40	FcARF10	5.94161	5.70782
11	1	FcARF11	0.332759	-0.0030144
11	2	FcARF11	0.333356	-0.00181742
11	3	FcARF11	0.335729	0.00115611
11	4	FcARF11	0.338114	0.00414051
11	5	FcARF11	0.337303	0.00393032
11	6	FcARF11	0.33503	0.00225692
11	7	FcARF11	0.330806	-0.00136671
11	8	FcARF11	0.327791	-0.00378246
11	9	FcARF11	0.327569	-0.00340385
11	10	FcARF11	0.327687	-0.00268644
11	11	FcARF11	0.327744	-0.00202891
11	12	FcARF11	0.327696	-0.00147709
11	13	FcARF11	0.327183	-0.00138989
11	14	FcARF11	0.326109	-0.00186363
11	15	FcARF11	0.325551	-0.00182187
11	16	FcARF11	0.326179	-0.000594313
11	17	FcARF11	0.326856	0.000683463
11	18	FcARF11	0.328759	0.00318606
11	19	FcARF11	0.330035	0.00506178
11	20	FcARF11	0.333891	0.00951765
11	21	FcARF11	0.340985	0.0172118
11	22	FcARF11	0.353723	0.0305499
11	23	FcARF11	0.383632	0.0610587
11	24	FcARF11	0.442115	0.120142
11	25	FcARF11	0.549244	0.227871
11	26	FcARF11	0.746042	0.425269
11	27	FcARF11	1.08071	0.760534
11	28	FcARF11	1.58818	1.2686
11	29	FcARF11	2.2388	1.91983
11	30	FcARF11	2.88397	2.5656
11	31	FcARF11	3.38202	3.06425
11	32	FcARF11	3.72832	3.41115
11	33	FcARF11	3.95797	3.6414
11	34	FcARF11	4.13619	3.82022
11	35	FcARF11	4.27693	3.96156
11	36	FcARF11	4.37258	4.05781
11	37	FcARF11	4.44458	4.13041
11	38	FcARF11	4.51291	4.19934
11	39	FcARF11	4.55673	4.24376
11	40	FcARF11	4.58353	4.27116
12	1	FcARF12	0.0937579	-0.0143522
12	2	FcARF12	0.0961027	-0.0128799
12	3	FcARF12	0.103056	-0.0067993
12	4	FcARF12	0.108703	-0.00202411
12	5	FcARF12	0.111527	-7.26923e-05
12	6	FcARF12	0.113934	0.00146166
12	7	FcARF12	0.11528	0.00193545
12	8	FcARF12	0.115654	0.00143662
12	9	FcARF12	0.115794	0.000704213
12	10	FcARF12	0.118487	0.00252536
12	11	FcARF12	0.119766	0.00293173
12	12	FcARF12	0.119792	0.00208503
12	13	FcARF12	0.120217	0.00163769
12	14	FcARF12	0.12081	0.00135798
12	15	FcARF12	0.120901	0.00057701
12	16	FcARF12	0.120752	-0.000444644
12	17	FcARF12	0.12028	-0.00178942
12	18	FcARF12	0.121471	-0.00147043
12	19	FcARF12	0.121945	-0.00186885
12	20	FcARF12	0.122098	-0.00258856
12	21	FcARF12	0.125964	0.000405261
12	22	FcARF12	0.130439	0.00400768
12	23	FcARF12	0.139474	0.0121697
12	24	FcARF12	0.157232	0.0290553
12	25	FcARF12	0.195614	0.0665648
12	26	FcARF12	0.268058	0.138137
12	27	FcARF12	0.401866	0.271072
12	28	FcARF12	0.654305	0.522639
12	29	FcARF12	1.08978	0.95724
12	30	FcARF12	1.77131	1.6379
12	31	FcARF12	2.65989	2.5256
12	32	FcARF12	3.59778	3.46263
12	33	FcARF12	4.351	4.21497
12	34	FcARF12	4.847	4.7101
12	35	FcARF12	5.19784	5.06007
12	36	FcARF12	5.4606	5.32196
12	37	FcARF12	5.62609	5.48657
12	38	FcARF12	5.73982	5.59943
12	39	FcARF12	5.83368	5.69242
12	40	FcARF12	5.89618	5.75404
13	1	FcARF13	0.280255	-0.0142554
13	2	FcARF13	0.283939	-0.0117204
13	3	FcARF13	0.291653	-0.00515423
13	4	FcARF13	0.29777	-0.0001861
13	5	FcARF13	0.301101	0.00199623
13	6	FcARF13	0.303172	0.00291858
13	7	FcARF13	0.3028	0.00139743
13	8	FcARF13	0.30303	0.000479606
13	9	FcARF13	0.305111	0.00141194
13	10	FcARF13	0.305821	0.000972706
13	11	FcARF13	0.305651	-0.00034617
13	12	FcARF13	0.30566	-0.00148585
13	13	FcARF13	0.307191	-0.00110292
13	14	FcARF13	0.308801	-0.000641227
13	15	FcARF13	0.309858	-0.000733023
13	16	FcARF13	0.311172	-0.000568131
13	17	FcARF13	0.31393	0.00104116
13	18	FcARF13	0.320117	0.00607924
13	19	FcARF13	0.332048	0.0168621
13	20	FcARF13	0.354697	0.0383629
13	21	FcARF13	0.400012	0.0825293
13	22	FcARF13	0.487899	0.169267
13	23	FcARF13	0.647709	0.327928
13	24	FcARF13	0.929404	0.608475
13	25	FcARF13	1.37058	1.0485
13	26	FcARF13	1.94645	1.62322
13	27	FcARF13	2.52213	2.19776
13	28	FcARF13	2.95695	2.63143
13	29	FcARF13	3.27619	2.94952
13	30	FcARF13	3.54706	3.21924
13	31	FcARF13	3.77002	3.44105
13	32	FcARF13	3.94397	3.61385
13	33	FcARF13	4.0728	3.74153
13	34	FcARF13	4.16517	3.83275
13	35	FcARF13	4.24383	3.91027
13	36	FcARF13	4.31161	3.9769
13	37	FcARF13	4.37057	4.0347
13	38	FcARF13	4.41284	4.07583
13	39	FcARF13	4.45453	4.11638
13	40	FcARF13	4.48052	4.14121
14	1	FcARF14	0.0410475	-0.00888027
14	2	FcARF14	0.0433738	-0.00791079
14	3	FcARF14	0.0504163	-0.00222524
14	4	FcARF14	0.0548772	0.000878865
14	5	FcARF14	0.0559951	0.000639835
14	6	FcARF14	0.0569726	0.000260435
14	7	FcARF14	0.0584556	0.000386583
14	8	FcARF14	0.0604314	0.00100546
14	9	FcARF14	0.0616169	0.000834082
14	10	FcARF14	0.0622777	0.000137966
14	11	FcARF14	0.063143	-0.000353554
14	12	FcARF14	0.0650803	0.000226786
14	13	FcARF14	0.0663163	0.000105921
14	14	FcARF14	0.0661445	-0.00142272
14	15	FcARF14	0.0657985	-0.00312563
14	16	FcARF14	0.0699961	-0.000284924
14	17	FcARF14	0.074574	0.00293614
14	18	FcARF14	0.0807013	0.00770646
14	19	FcARF14	0.094923	0.0205713
14	20	FcARF14	0.123271	0.0475622
14	21	FcARF14	0.175707	0.0986413
14	22	FcARF14	0.277783	0.199361
14	23	FcARF14	0.470718	0.390939
14	24	FcARF14	0.812654	0.731518
14	25	FcARF14	1.35324	1.27074
14	26	FcARF14	2.01096	1.92711
14	27	FcARF14	2.57219	2.48698
14	28	FcARF14	2.998	2.91143
14	29	FcARF14	3.42349	3.33557
14	30	FcARF14	3.798	3.70872
14	31	FcARF14	4.10103	4.0104
14	32	FcARF14	4.3102	4.2182
14	33	FcARF14	4.47572	4.38237
14	34	FcARF14	4.61419	4.51949
14	35	FcARF14	4.71512	4.61905
14	36	FcARF14	4.8141	4.71668
14	37	FcARF14	4.88275	4.78398
14	38	FcARF14	4.94763	4.8475
14	39	FcARF14	4.97805	4.87656
14	40	FcARF14	5.02212	4.91928
15	1	FcARF15	0.0318542	-0.0119187
15	2	FcARF15	0.0344081	-0.0100213
15	3	FcARF15	0.0395328	-0.00555311
15	4	FcARF15	0.0427585	-0.00298392
15	5	FcARF15	0.0454666	-0.000932276
15	6	FcARF15	0.0475638	0.000508313
15	7	FcARF15	0.0475666	-0.000145389
15	8	FcARF15	0.0496205	0.00125201
15	9	FcARF15	0.0523684	0.00334341
15	10	FcARF15	0.0519694	0.00228787
15	11	FcARF15	0.0512062	0.00086821
15	12	FcARF15	0.0527549	0.00176039
15	13	FcARF15	0.0527948	0.00114374
15	14	FcARF15	0.0529372	0.000629604
15	15	FcARF15	0.0554938	0.00252978
15	16	FcARF15	0.0551745	0.00155388
15	17	FcARF15	0.0552297	0.000952634
15	18	FcARF15	0.0557193	0.000785656
15	19	FcARF15	0.0566082	0.00101803
15	20	FcARF15	0.0555072	-0.000739442
15	21	FcARF15	0.0544572	-0.00244596
15	22	FcARF15	0.0554693	-0.00209042
15	23	FcARF15	0.0552826	-0.00293358
15	24	FcARF15	0.0576286	-0.00124409
15	25	FcARF15	0.0599639	0.000434651
15	26	FcARF15	0.0644037	0.00421792
15	27	FcARF15	0.0743383	0.0134961
15	28	FcARF15	0.0924986	0.0309998
15	29	FcARF15	0.127515	0.0653601
15	30	FcARF15	0.194702	0.13189
15	31	FcARF15	0.320462	0.256993
15	32	FcARF15	0.545934	0.48181
15	33	FcARF15	0.911352	0.846571
15	34	FcARF15	1.37711	1.31167
15	35	FcARF15	1.86333	1.79723
15	36	FcARF15	2.38046	2.31371
15	37	FcARF15	2.88269	2.81529
15	38	FcARF15	3.30329	3.23523
15	39	FcARF15	3.63089	3.56217
15	40	FcARF15	3.8594	3.79002
16	1	FcARF16	0.175246	-0.0198389
16	2	FcARF16	0.179635	-0.0176511
16	3	FcARF16	0.189986	-0.00950165
16	4	FcARF16	0.197578	-0.00411079
16	5	FcARF16	0.202282	-0.00160784
16	6	FcARF16	0.207705	0.00161434
16	7	FcARF16	0.211366	0.00307397
16	8	FcARF16	0.212916	0.00242194
16	9	FcARF16	0.215417	0.00272157
16	10	FcARF16	0.218338	0.00344155
16	11	FcARF16	0.221714	0.00461643
16	12	FcARF16	0.222534	0.0032351
16	13	FcARF16	0.224512	0.00301149
16	14	FcARF16	0.224124	0.000422639
16	15	FcARF16	0.226596	0.000692991
16	16	FcARF16	0.230101	0.00199742
16	17	FcARF16	0.229834	-0.000471458
16	18	FcARF16	0.229443	-0.00306378
16	19	FcARF16	0.232899	-0.00180843
16	20	FcARF16	0.234179	-0.00272989
16	21	FcARF16	0.235086	-0.00402444
16	22	FcARF16	0.239785	-0.00152713
16	23	FcARF16	0.245109	0.00159598
16	24	FcARF16	0.25323	0.00751518
16	25	FcARF16	0.269306	0.0213902
16	26	FcARF16	0.300319	0.0502019
16	27	FcARF16	0.356116	0.103798
16	28	FcARF16	0.464393	0.209874
16	29	FcARF16	0.66402	0.407299
16	30	FcARF16	1.01846	0.759538
16	31	FcARF16	1.59188	1.33076
16	32	FcARF16	2.39768	2.13435
16	33	FcARF16	3.28883	3.02331
16	34	FcARF16	4.03255	3.76482
16	35	FcARF16	4.56052	4.29059
16	36	FcARF16	4.96683	4.6947
16	37	FcARF16	5.30558	5.03124
16	38	FcARF16	5.56832	5.29179
16	39	FcARF16	5.76473	5.486
16	40	FcARF16	5.88728	5.60635
17	1	FcARF17	0.102948	-0.0203104
17	2	FcARF17	0.108783	-0.0165034
17	3	FcARF17	0.116627	-0.0106868
17	4	FcARF17	0.124343	-0.00499828
17	5	FcARF17	0.129148	-0.0022213
17	6	FcARF17	0.13388	0.000482509
17	7	FcARF17	0.139129	0.00370354
17	8	FcARF17	0.142068	0.00461492
17	9	FcARF17	0.14448	0.00499852
17	10	FcARF17	0.146984	0.00547504
17	11	FcARF17	0.147751	0.00421447
17	12	FcARF17	0.150222	0.00465775
17	13	FcARF17	0.151011	0.0034185
17	14	FcARF17	0.151892	0.00227177
17	15	FcARF17	0.151344	-0.000304588
17	16	FcARF17	0.15145	-0.00222596
17	17	FcARF17	0.151826	-0.00387807
17	18	FcARF17	0.151516	-0.00621586
17	19	FcARF17	0.156453	-0.00330614
17	20	FcARF17	0.163608	0.00182063
17	21	FcARF17	0.176304	0.012489
17	22	FcARF17	0.206374	0.0405307
17	23	FcARF17	0.260828	0.0929566
17	24	FcARF17	0.365933	0.196034
17	25	FcARF17	0.559991	0.388064
17	26	FcARF17	0.895103	0.721149
17	27	FcARF17	1.41517	1.23919
17	28	FcARF17	2.09484	1.91683
17	29	FcARF17	2.81139	2.63135
17	30	FcARF17	3.42871	3.24665
17	31	FcARF17	3.86959	3.68549
17	32	FcARF17	4.16066	3.97454
17	33	FcARF17	4.3668	4.17865
17	34	FcARF17	4.52953	4.33936
17	35	FcARF17	4.64733	4.45513
17	36	FcARF17	4.73526	4.54103
17	37	FcARF17	4.78615	4.58989
17	38	FcARF17	4.82443	4.62614
17	39	FcARF17	4.85577	4.65545
17	40	FcARF17	4.86829	4.66595
18	1	FcARF18	0.155266	-0.0186067
18	2	FcARF18	0.158153	-0.0160492
18	3	FcARF18	0.16469	-0.00984188
18	4	FcARF18	0.169967	-0.00489501
18	5	FcARF18	0.173725	-0.00146694
18	6	FcARF18	0.177948	0.00242549
18	7	FcARF18	0.181723	0.00587085
18	8	FcARF18	0.18248	0.00629802
18	9	FcARF18	0.181746	0.00523333
18	10	FcARF18	0.179184	0.00234144
18	11	FcARF18	0.178097	0.000924578
18	12	FcARF18	0.178234	0.000731338
18	13	FcARF18	0.178824	0.000991868
18	14	FcARF18	0.178921	0.000758976
18	15	FcARF18	0.177902	-0.000590192
18	16	FcARF18	0.177891	-0.000931491
18	17	FcARF18	0.177148	-0.00200448
18	18	FcARF18	0.177036	-0.00244653
18	19	FcARF18	0.178044	-0.00176768
18	20	FcARF18	0.178142	-0.00200014
18	21	FcARF18	0.180161	-0.000310912
18	22	FcARF18	0.180195	-0.000607268
18	23	FcARF18	0.181073	-5.94144e-05
18	24	FcARF18	0.180972	-0.00049015
18	25	FcARF18	0.183628	0.00183619
18	26	FcARF18	0.189338	0.00721641
18	27	FcARF18	0.202537	0.0200849
18	28	FcARF18	0.224409	0.041627
18	29	FcARF18	0.263983	0.0808705
18	30	FcARF18	0.338837	0.155395
18	31	FcARF18	0.473332	0.28956
18	32	FcARF18	0.70752	0.523418
18	33	FcARF18	1.09864	0.914212
18	34	FcARF18	1.70153	1.51676
18	35	FcARF18	2.50525	2.32016
18	36	FcARF18	3.36347	3.17805
18	37	FcARF18	4.11469	3.92894
18	38	FcARF18	4.68348	4.4974
18	39	FcARF18	5.10813	4.92172
18	40	FcARF18	5.36643	5.17968
19	1	FcARF19	0.0388347	-0.0218698
19	2	FcARF19	0.0427801	-0.0192021
19	3	FcARF19	0.0515527	-0.0117073
19	4	FcARF19	0.0573397	-0.00719808
19	5	FcARF19	0.0630121	-0.00280341
19	6	FcARF19	0.0668425	-0.000250827
19	7	FcARF19	0.0706613	0.00229026
19	8	FcARF19	0.0733874	0.00373861
19	9	FcARF19	0.0757085	0.00478194
19	10	FcARF19	0.0774049	0.00520059
19	11	FcARF19	0.078283	0.00480097
19	12	FcARF19	0.0815817	0.00682182
19	13	FcARF19	0.0816905	0.00565293
19	14	FcARF19	0.0801218	0.00280641
19	15	FcARF19	0.0799398	0.00134674
19	16	FcARF19	0.079947	7.61091e-05
19	17	FcARF19	0.0824813	0.00133272
19	18	FcARF19	0.0816347	-0.000791692
19	19	FcARF19	0.0811751	-0.00252906
19	20	FcARF19	0.0819403	-0.00304155
19	21	FcARF19	0.082267	-0.00399262
19	22	FcARF19	0.0833376	-0.00419979
19	23	FcARF19	0.0864804	-0.00233476
19	24	FcARF19	0.0926529	0.00255998
19	25	FcARF19	0.103395	0.0120243
19	26	FcARF19	0.127955	0.0353065
19	27	FcARF19	0.177902	0.0839756
19	28	FcARF19	0.272648	0.177444
19	29	FcARF19	0.451155	0.354673
19	30	FcARF19	0.774439	0.67668
19	31	FcARF19	1.31805	1.21901
19	32	FcARF19	2.10503	2.00472
19	33	FcARF19	3.02341	2.92182
19	34	FcARF19	3.82515	3.72227
19	35	FcARF19	4.36534	4.26119
19	36	FcARF19	4.71626	4.61083
19	37	FcARF19	4.96978	4.86308
19	38	FcARF19	5.13738	5.0294
19	39	FcARF19	5.27129	5.16203
19	40	FcARF19	5.36098	5.25045
20	1	FcARF20	0.0649928	-0.0194809
20	2	FcARF20	0.0685693	-0.0165824
20	3	FcARF20	0.0774419	-0.00838783
20	4	FcARF20	0.0835632	-0.00294467
20	5	FcARF20	0.0872793	9.344e-05
20	6	FcARF20	0.0903538	0.00248991
20	7	FcARF20	0.0904431	0.00190121
20	8	FcARF20	0.0912117	0.00199182
20	9	FcARF20	0.0927672	0.00286921
20	10	FcARF20	0.0924618	0.00188578
20	11	FcARF20	0.0914167	0.000162733
20	12	FcARF20	0.092596	0.000664013
20	13	FcARF20	0.0945387	0.00192864
20	14	FcARF20	0.0950989	0.00181078
20	15	FcARF20	0.0958875	0.00192136
20	16	FcARF20	0.0962374	0.00159321
20	17	FcARF20	0.0956382	0.000316016
20	18	FcARF20	0.094872	-0.00112819
20	19	FcARF20	0.0963255	-0.00035273
20	20	FcARF20	0.0957102	-0.00164606
20	21	FcARF20	0.0963684	-0.00166588
20	22	FcARF20	0.0959808	-0.00273148
20	23	FcARF20	0.0981268	-0.00126357
20	24	FcARF20	0.100561	0.000492289
20	25	FcARF20	0.104611	0.00386414
20	26	FcARF20	0.113467	0.0120425
20	27	FcARF20	0.130724	0.0286216
20	28	FcARF20	0.163752	0.0609717
20	29	FcARF20	0.230105	0.126647
20	30	FcARF20	0.357231	0.253094
20	31	FcARF20	0.590658	0.485843
20	32	FcARF20	0.99577	0.890277
20	33	FcARF20	1.62616	1.51999
20	34	FcARF20	2.44706	2.34021
20	35	FcARF20	3.28881	3.18129
20	36	FcARF20	3.93982	3.83162
20	37	FcARF20	4.32989	4.22101
20	38	FcARF20	4.58846	4.4789
20	39	FcARF20	4.77303	4.66279
20	40	FcARF20	4.89377	4.78285
21	1	Actin	-0.00179809	-0.0172113
21	2	Actin	0.00197446	-0.0152586
21	3	Actin	0.00955541	-0.00949749
21	4	Actin	0.0161634	-0.00470931
21	5	Actin	0.021386	-0.00130662
21	6	Actin	0.0268469	0.00233452
21	7	Actin	0.0296548	0.00332256
21	8	Actin	0.031347	0.00319492
21	9	Actin	0.0338831	0.00391122
21	10	Actin	0.0360325	0.00424078
21	11	Actin	0.0376441	0.00403257
21	12	Actin	0.0395883	0.00415693
21	13	Actin	0.0406745	0.00342323
21	14	Actin	0.0395613	0.00049022
21	15	Actin	0.0399683	-0.000922652
21	16	Actin	0.0394593	-0.00325145
21	17	Actin	0.040095	-0.00443562
21	18	Actin	0.0425665	-0.00378392
21	19	Actin	0.0469704	-0.00119988
21	20	Actin	0.0534872	0.00349711
21	21	Actin	0.066773	0.0149631
21	22	Actin	0.0887324	0.0351026
21	23	Actin	0.128891	0.0734412
21	24	Actin	0.205468	0.148199
21	25	Actin	0.340312	0.281223
21	26	Actin	0.568283	0.507374
21	27	Actin	0.925429	0.8627
21	28	Actin	1.41457	1.35002
21	29	Actin	1.95751	1.89114
21	30	Actin	2.44525	2.37706
21	31	Actin	2.83214	2.76214
21	32	Actin	3.13405	3.06223
21	33	Actin	3.36267	3.28903
21	34	Actin	3.51589	3.44042
21	35	Actin	3.61404	3.53675
21	36	Actin	3.67151	3.5924
21	37	Actin	3.71354	3.63261
21	38	Actin	3.73671	3.65396
21	39	Actin	3.7474	3.66284
21	40	Actin	3.75884	3.67245
22	1	FcARF1	-1.55879	-0.0512095
22	2	FcARF1	-1.44601	0.0295499
22	3	FcARF1	-1.42731	0.0162261
22	4	FcARF1	-1.32771	0.0838038
22	5	FcARF1	-1.23931	0.140184
22	6	FcARF1	-1.20586	0.141616
22	7	FcARF1	-1.1445	0.170954
22	8	FcARF1	-1.23869	0.0447469
22	9	FcARF1	-1.22144	0.0299704
22	10	FcARF1	-1.07196	0.14743
22	11	FcARF1	-1.04651	0.140858
22	12	FcARF1	-1.08566	0.0696924
22	13	FcARF1	-1.11771	0.00561676
22	14	FcARF1	-1.14835	-0.0570413
22	15	FcARF1	-1.04732	0.0119639
22	16	FcARF1	-1.10765	-0.0803817
22	17	FcARF1	-1.2428	-0.247552
22	18	FcARF1	-1.26055	-0.29733
22	19	FcARF1	-1.05308	-0.121878
22	20	FcARF1	-0.962823	-0.0636435
22	21	FcARF1	-0.936316	-0.0691579
22	22	FcARF1	-0.953009	-0.117872
22	23	FcARF1	-0.933865	-0.130749
22	24	FcARF1	-0.944974	-0.173879
22	25	FcARF1	-0.877041	-0.137968
22	26	FcARF1	-0.88718	-0.180128
22	27	FcARF1	-0.833605	-0.158574
22	28	FcARF1	-0.737595	-0.0945852
22	29	FcARF1	-0.658272	-0.0472841
22	30	FcARF1	-0.591538	-0.0125714
22	31	FcARF1	-0.512624	0.0343214
22	32	FcARF1	-0.416654	0.0982704
22	33	FcARF1	-0.424831	0.0580722
22	34	FcARF1	-0.28381	0.167072
22	35	FcARF1	-0.304038	0.114823
22	36	FcARF1	-0.352142	0.0346978
22	37	FcARF1	-0.216576	0.138242
22	38	FcARF1	-0.193869	0.128928
22	39	FcARF1	-0.0776686	0.213107
22	40	FcARF1	-0.0566899	0.202065
23	1	FcARF1	1.11732	-0.0843965
23	2	FcARF1	1.12359	-0.0842506
23	3	FcARF1	1.19348	-0.0204877
23	4	FcARF1	1.27075	0.0506523
23	5	FcARF1	1.25319	0.0269608
23	6	FcARF1	1.21985	-0.0125054
23	7	FcARF1	1.21055	-0.0279345
23	8	FcARF1	1.20855	-0.0360574
23	9	FcARF1	1.22294	-0.0277929
23	10	FcARF1	1.25696	9.83279e-05
23	11	FcARF1	1.26946	0.00646425
23	12	FcARF1	1.2697	0.000575584
23	13	FcARF1	1.27665	0.00139732
23	14	FcARF1	1.30048	0.0191001
23	15	FcARF1	1.27779	-0.00971614
23	16	FcARF1	1.30173	0.00810163
23	17	FcARF1	1.30235	0.00258799
23	18	FcARF1	1.33261	0.0267218
23	19	FcARF1	1.33789	0.0258768
23	20	FcARF1	1.32432	0.00617473
23	21	FcARF1	1.33048	0.00621219
23	22	FcARF1	1.32158	-0.00882078
23	23	FcARF1	1.32568	-0.0108458
23	24	FcARF1	1.31589	-0.0267632
23	25	FcARF1	1.33187	-0.0169062
23	26	FcARF1	1.37507	0.020163
23	27	FcARF1	1.40688	0.0458503
23	28	FcARF1	1.43445	0.067292
23	29	FcARF1	1.61919	0.245905
23	30	FcARF1	1.64233	0.262914
23	31	FcARF1	1.60637	0.220824
23	32	FcARF1	1.60663	0.214961
23	33	FcARF1	1.63962	0.241816
23	34	FcARF1	1.6735	0.26957
23	35	FcARF1	1.65478	0.244726
23	36	FcARF1	1.66716	0.250974
23	37	FcARF1	1.64985	0.227545
23	38	FcARF1	1.71744	0.289004
23	39	FcARF1	1.71312	0.278551
23	40	FcARF1	1.60295	0.162259
24	1	FcARF1	5.96254	0.246549
24	2	FcARF1	5.95588	0.209983
24	3	FcARF1	5.85208	0.0762812
24	4	FcARF1	5.77895	-0.0267595
24	5	FcARF1	5.73041	-0.105208
24	6	FcARF1	5.79619	-0.0693263
24	7	FcARF1	5.89433	-0.0010943
24	8	FcARF1	6.00015	0.0748148
24	9	FcARF1	6.11255	0.157309
24	10	FcARF1	6.01583	0.0306878
24	11	FcARF1	5.93872	-0.0763302
24	12	FcARF1	5.93624	-0.108715
24	13	FcARF1	6.06105	-0.0138174
24	14	FcARF1	6.20663	0.101858
24	15	FcARF1	6.09498	-0.0397001
24	16	FcARF1	6.12879	-0.0357896
24	17	FcARF1	6.19015	-0.0043427
24	18	FcARF1	6.20353	-0.0208651
24	19	FcARF1	6.25707	0.00276643
24	20	FcARF1	6.21788	-0.066333
24	21	FcARF1	6.30824	-0.00587438
24	22	FcARF1	6.22801	-0.116007
24	23	FcARF1	6.11539	-0.258539
24	24	FcARF1	6.27555	-0.128278
24	25	FcARF1	6.32604	-0.107702
24	26	FcARF1	6.16896	-0.294683
24	27	FcARF1	6.21064	-0.282908
24	28	FcARF1	6.39993	-0.123533
24	29	FcARF1	6.34806	-0.205301
24	30	FcARF1	6.45857	-0.1247
24	31	FcARF1	6.54923	-0.0639462
24	32	FcARF1	6.67573	0.0326439
24	33	FcARF1	6.78854	0.115555
24	34	FcARF1	6.66108	-0.0418167
24	35	FcARF1	6.70165	-0.0311532
24	36	FcARF1	6.71586	-0.0468488
24	37	FcARF1	6.92201	0.129393
24	38	FcARF1	6.81542	-0.0070973
24	39	FcARF1	6.67663	-0.175798
24	40	FcARF1	6.54228	-0.340052
25	1	FcARF1	-7.74061	-0.941654
25	2	FcARF1	-7.38243	-0.529453
25	3	FcARF1	-6.77987	0.127125
25	4	FcARF1	-6.6005	0.360503
25	5	FcARF1	-6.88265	0.132367
25	6	FcARF1	-7.0834	-0.0143633
25	7	FcARF1	-7.10128	0.0217666
25	8	FcARF1	-6.89782	0.279246
25	9	FcARF1	-6.99684	0.234243
25	10	FcARF1	-7.50058	-0.215484
25	11	FcARF1	-7.71707	-0.377955
25	12	FcARF1	-7.80799	-0.414866
25	13	FcARF1	-8.09015	-0.643011
25	14	FcARF1	-7.85233	-0.351171
25	15	FcARF1	-7.10056	0.454612
25	16	FcARF1	-7.17754	0.431649
25	17	FcARF1	-7.51514	0.148064
25	18	FcARF1	-8.05545	-0.338231
25	19	FcARF1	-8.90122	-1.12999
25	20	FcARF1	-8.59634	-0.771094
25	21	FcARF1	-6.82419	1.05508
25	22	FcARF1	-6.92176	1.01152
25	23	FcARF1	-7.27102	0.716276
25	24	FcARF1	-6.84035	1.20096
25	25	FcARF1	-6.67719	1.41814
25	26	FcARF1	-6.17981	1.96953
25	27	FcARF1	-5.69547	2.50789
25	28	FcARF1	-5.84301	2.41436
25	29	FcARF1	-6.15408	2.15731
25	30	FcARF1	-6.27129	2.09411
25	31	FcARF1	-5.8578	2.56161
25	32	FcARF1	-6.86292	1.61051
25	33	FcARF1	-7.27858	1.24887
25	34	FcARF1	-6.6116	1.96986
25	35	FcARF1	-6.75899	1.87648
25	36	FcARF1	-6.72809	1.9614
25	37	FcARF1	-6.58806	2.15544
25	38	FcARF1	-6.70482	2.0927
25	39	FcARF1	-7.1278	1.72373
25	40	FcARF1	-7.28693	1.61862
26	1	FcARF2	0.0821825	-0.0140389
26	2	FcARF2	0.0858982	-0.0107371
26	3	FcARF2	0.0924455	-0.00460372
26	4	FcARF2	0.096926	-0.000537115
26	5	FcARF2	0.0992249	0.00134792
26	6	FcARF2	0.100052	0.0017609
26	7	FcARF2	0.100806	0.00210146
26	8	FcARF2	0.101021	0.00190246
26	9	FcARF2	0.100507	0.000974388
26	10	FcARF2	0.100211	0.00026455
26	11	FcARF2	0.100948	0.000587585
26	12	FcARF2	0.100354	-0.000420306
26	13	FcARF2	0.100157	-0.00103169
26	14	FcARF2	0.102036	0.000433696
26	15	FcARF2	0.101771	-0.000244843
26	16	FcARF2	0.101059	-0.00137071
26	17	FcARF2	0.100796	-0.00204811
26	18	FcARF2	0.102417	-0.000840373
26	19	FcARF2	0.102415	-0.00125688
26	20	FcARF2	0.104023	-6.28587e-05
26	21	FcARF2	0.107543	0.00304365
26	22	FcARF2	0.11378	0.00886642
26	23	FcARF2	0.125629	0.0203013
26	24	FcARF2	0.150117	0.0443759
26	25	FcARF2	0.198927	0.0927719
26	26	FcARF2	0.291746	0.185177
26	27	FcARF2	0.463365	0.356382
26	28	FcARF2	0.77112	0.663723
26	29	FcARF2	1.26247	1.15466
26	30	FcARF2	1.94622	1.838
26	31	FcARF2	2.71975	2.61111
26	32	FcARF2	3.42101	3.31195
26	33	FcARF2	3.94105	3.83159
26	34	FcARF2	4.27616	4.16628
26	35	FcARF2	4.48687	4.37658
26	36	FcARF2	4.6265	4.51579
26	37	FcARF2	4.70424	4.59312
26	38	FcARF2	4.75904	4.64751
26	39	FcARF2	4.80114	4.68919
26	40	FcARF2	4.82843	4.71607
27	1	FcARF3	0.101226	-0.0260841
27	2	FcARF3	0.102068	-0.0248121
27	3	FcARF3	0.110086	-0.0163632
27	4	FcARF3	0.120846	-0.00517237
27	5	FcARF3	0.121095	-0.0044927
27	6	FcARF3	0.122645	-0.00251145
27	7	FcARF3	0.126249	0.00152251
27	8	FcARF3	0.128681	0.00438558
27	9	FcARF3	0.127471	0.00360622
27	10	FcARF3	0.123548	0.000114329
27	11	FcARF3	0.121783	-0.00122074
27	12	FcARF3	0.127374	0.00480102
27	13	FcARF3	0.130797	0.00865531
27	14	FcARF3	0.130219	0.00850832
27	15	FcARF3	0.127043	0.00576215
27	16	FcARF3	0.126695	0.00584492
27	17	FcARF3	0.125702	0.00528307
27	18	FcARF3	0.124753	0.00476481
27	19	FcARF3	0.125033	0.00547516
27	20	FcARF3	0.119172	4.50527e-05
27	21	FcARF3	0.115801	-0.00289503
27	22	FcARF3	0.11509	-0.00317524
27	23	FcARF3	0.113741	-0.00409328
27	24	FcARF3	0.114301	-0.00310277
27	25	FcARF3	0.111989	-0.00498388
27	26	FcARF3	0.110532	-0.00601068
27	27	FcARF3	0.111365	-0.00474708
27	28	FcARF3	0.111955	-0.00372574
27	29	FcARF3	0.119377	0.00412657
27	30	FcARF3	0.124998	0.0101781
27	31	FcARF3	0.132626	0.0182374
27	32	FcARF3	0.135593	0.0216351
27	33	FcARF3	0.147435	0.0339075
27	34	FcARF3	0.147958	0.0348617
27	35	FcARF3	0.149317	0.0366509
27	36	FcARF3	0.154524	0.0422893
27	37	FcARF3	0.156587	0.0447828
27	38	FcARF3	0.156946	0.0455724
27	39	FcARF3	0.153746	0.0428033
27	40	FcARF3	0.149207	0.0386948
28	1	FcARF4	-0.0205452	-0.012554
28	2	FcARF4	-0.0180193	-0.0109872
28	3	FcARF4	-0.0125201	-0.00644723
28	4	FcARF4	-0.0080678	-0.00295409
28	5	FcARF4	-0.00480727	-0.000652727
28	6	FcARF4	-0.00135221	0.00184316
28	7	FcARF4	-0.000374855	0.00186135
28	8	FcARF4	0.000291499	0.00156854
28	9	FcARF4	0.00265162	0.00296949
28	10	FcARF4	0.00273819	0.00209689
28	11	FcARF4	0.00436348	0.00276302
28	12	FcARF4	0.00396795	0.00140832
28	13	FcARF4	0.00401091	0.00049212
28	14	FcARF4	0.00578265	0.00130469
28	15	FcARF4	0.00673733	0.0013002
28	16	FcARF4	0.00643273	3.64308e-05
28	17	FcARF4	0.00625619	-0.00109927
28	18	FcARF4	0.00689292	-0.00142171
28	19	FcARF4	0.00664376	-0.00263004
28	20	FcARF4	0.00754576	-0.0026872
28	21	FcARF4	0.0106074	-0.000584716
28	22	FcARF4	0.0129841	0.000832756
28	23	FcARF4	0.0188239	0.00571344
28	24	FcARF4	0.0320669	0.0179973
28	25	FcARF4	0.0590896	0.0440608
28	26	FcARF4	0.109581	0.093593
28	27	FcARF4	0.208092	0.191145
28	28	FcARF4	0.391974	0.374068
28	29	FcARF4	0.716373	0.697508
28	30	FcARF4	1.2468	1.22698
28	31	FcARF4	1.98553	1.96475
28	32	FcARF4	2.81372	2.79198
28	33	FcARF4	3.54393	3.52123
28	34	FcARF4	4.05203	4.02837
28	35	FcARF4	4.37517	4.35055
28	36	FcARF4	4.59997	4.57439
28	37	FcARF4	4.75093	4.72439
28	38	FcARF4	4.85083	4.82333
28	39	FcARF4	4.90797	4.87952
28	40	FcARF4	4.94059	4.91118
29	1	FcARF5	0.0449657	-0.0231799
29	2	FcARF5	0.0484887	-0.0201309
29	3	FcARF5	0.0568718	-0.0122217
29	4	FcARF5	0.0635238	-0.00604368
29	5	FcARF5	0.06798	-0.00206139
29	6	FcARF5	0.0709503	0.000434968
29	7	FcARF5	0.0749924	0.00400317
29	8	FcARF5	0.0759412	0.00447804
29	9	FcARF5	0.0758983	0.00396118
29	10	FcARF5	0.0772764	0.00486543
29	11	FcARF5	0.0774204	0.0045355
29	12	FcARF5	0.0777171	0.00435823
29	13	FcARF5	0.0767031	0.00287026
29	14	FcARF5	0.0764721	0.00216537
29	15	FcARF5	0.0759622	0.00118158
29	16	FcARF5	0.0758392	0.000584597
29	17	FcARF5	0.0764032	0.000674685
29	18	FcARF5	0.0757929	-0.000409552
29	19	FcARF5	0.0747675	-0.00190883
29	20	FcARF5	0.0746512	-0.00249914
29	21	FcARF5	0.0740972	-0.00352705
29	22	FcARF5	0.07472	-0.00337818
29	23	FcARF5	0.076186	-0.00238604
29	24	FcARF5	0.0781995	-0.000846515
29	25	FcARF5	0.080689	0.00116906
29	26	FcARF5	0.0868808	0.00688694
29	27	FcARF5	0.098702	0.0182342
29	28	FcARF5	0.121222	0.0402807
29	29	FcARF5	0.165621	0.0842057
29	30	FcARF5	0.252394	0.170505
29	31	FcARF5	0.4088	0.326436
29	32	FcARF5	0.659285	0.576448
29	33	FcARF5	0.984659	0.901347
29	34	FcARF5	1.29143	1.20764
29	35	FcARF5	1.58997	1.50571
29	36	FcARF5	1.9189	1.83416
29	37	FcARF5	2.23175	2.14655
29	38	FcARF5	2.50589	2.42021
29	39	FcARF5	2.73262	2.64646
29	40	FcARF5	2.88159	2.79496
30	1	FcARF6	0.0596692	-0.0174132
30	2	FcARF6	0.0630568	-0.0142604
30	3	FcARF6	0.0683441	-0.00920787
30	4	FcARF6	0.072748	-0.0050387
30	5	FcARF6	0.0768478	-0.00117364
30	6	FcARF6	0.080728	0.00247177
30	7	FcARF6	0.0833184	0.00482736
30	8	FcARF6	0.0838996	0.00517384
30	9	FcARF6	0.0836452	0.00468467
30	10	FcARF6	0.0832603	0.00406502
30	11	FcARF6	0.0813719	0.00194188
30	12	FcARF6	0.0795645	-0.000100341
30	13	FcARF6	0.0787927	-0.00110692
30	14	FcARF6	0.0799175	-0.000216885
30	15	FcARF6	0.0812351	0.00086597
30	16	FcARF6	0.0807151	0.000111191
30	17	FcARF6	0.08068	-0.000158621
30	18	FcARF6	0.0798538	-0.00121966
30	19	FcARF6	0.0791506	-0.00215758
30	20	FcARF6	0.0785596	-0.00298331
30	21	FcARF6	0.0797522	-0.00202552
30	22	FcARF6	0.081289	-0.000723518
30	23	FcARF6	0.0824613	0.000214021
30	24	FcARF6	0.0842389	0.00175684
30	25	FcARF6	0.0889041	0.00618729
30	26	FcARF6	0.0989563	0.0160048
30	27	FcARF6	0.118154	0.0349676
30	28	FcARF6	0.156492	0.0730712
30	29	FcARF6	0.229653	0.145997
30	30	FcARF6	0.365242	0.281351
30	31	FcARF6	0.60842	0.524295
30	32	FcARF6	0.994603	0.910243
30	33	FcARF6	1.49881	1.41421
30	34	FcARF6	2.09395	2.00912
30	35	FcARF6	2.72391	2.63885
30	36	FcARF6	3.29199	3.20669
30	37	FcARF6	3.73041	3.64488
30	38	FcARF6	4.04401	3.95824
30	39	FcARF6	4.26849	4.18249
30	40	FcARF6	4.42037	4.33413
31	1	FcARF7	0.0160725	-0.0165709
31	2	FcARF7	0.0206757	-0.0131255
31	3	FcARF7	0.0283485	-0.00661047
31	4	FcARF7	0.0340971	-0.00201966
31	5	FcARF7	0.0363684	-0.000906113
31	6	FcARF7	0.0393451	0.000912827
31	7	FcARF7	0.0424343	0.0028442
31	8	FcARF7	0.0432814	0.00253359
31	9	FcARF7	0.0445745	0.00266892
31	10	FcARF7	0.0455762	0.00251289
31	11	FcARF7	0.045091	0.000869835
31	12	FcARF7	0.0465554	0.00117655
31	13	FcARF7	0.0483384	0.00180174
31	14	FcARF7	0.0484338	0.000739359
31	15	FcARF7	0.0488811	2.89085e-05
31	16	FcARF7	0.0490969	-0.000913035
31	17	FcARF7	0.0503064	-0.000861362
31	18	FcARF7	0.0511235	-0.001202
31	19	FcARF7	0.0517716	-0.00171171
31	20	FcARF7	0.0528751	-0.00176596
31	21	FcARF7	0.0551599	-0.000638897
31	22	FcARF7	0.057497	0.000540388
31	23	FcARF7	0.0621252	0.00401084
31	24	FcARF7	0.074074	0.0148018
31	25	FcARF7	0.096263	0.0358331
31	26	FcARF7	0.13858	0.0769922
31	27	FcARF7	0.214453	0.151707
31	28	FcARF7	0.346025	0.282122
31	29	FcARF7	0.562737	0.497676
31	30	FcARF7	0.880019	0.8138
31	31	FcARF7	1.26895	1.20157
31	32	FcARF7	1.65566	1.58712
31	33	FcARF7	1.98032	1.91063
31	34	FcARF7	2.2321	2.16126
31	35	FcARF7	2.41403	2.34202
31	36	FcARF7	2.52629	2.45312
31	37	FcARF7	2.59037	2.51605
31	38	FcARF7	2.62546	2.54998
31	39	FcARF7	2.64414	2.5675
31	40	FcARF7	2.65467	2.57687
32	1	FcARF8	0.14471	-0.0207756
32	2	FcARF8	0.148482	-0.0186061
32	3	FcARF8	0.157666	-0.0110264
32	4	FcARF8	0.164281	-0.00601423
32	5	FcARF8	0.170389	-0.00150947
32	6	FcARF8	0.174097	0.00059495
32	7	FcARF8	0.17778	0.00267477
32	8	FcARF8	0.180251	0.00354168
32	9	FcARF8	0.182885	0.00457225
32	10	FcARF8	0.186373	0.00645703
32	11	FcARF8	0.187593	0.00607415
32	12	FcARF8	0.187001	0.00387804
32	13	FcARF8	0.188411	0.00368494
32	14	FcARF8	0.187723	0.00139337
32	15	FcARF8	0.18819	0.000256879
32	16	FcARF8	0.189439	-9.77035e-05
32	17	FcARF8	0.190105	-0.0010344
32	18	FcARF8	0.189269	-0.00347394
32	19	FcARF8	0.189315	-0.00503134
32	20	FcARF8	0.192049	-0.00390153
32	21	FcARF8	0.195669	-0.00188406
32	22	FcARF8	0.200002	0.000844993
32	23	FcARF8	0.211202	0.0104415
32	24	FcARF8	0.234219	0.0318552
32	25	FcARF8	0.278303	0.0743357
32	26	FcARF8	0.360264	0.154693
32	27	FcARF8	0.513436	0.306262
32	28	FcARF8	0.793449	0.584672
32	29	FcARF8	1.2657	1.05532
32	30	FcARF8	1.97251	1.76053
32	31	FcARF8	2.84309	2.6295
32	32	FcARF8	3.68589	3.4707
32	33	FcARF8	4.30321	4.08641
32	34	FcARF8	4.72856	4.51016
32	35	FcARF8	5.03064	4.81064
32	36	FcARF8	5.24149	5.01989
32	37	FcARF8	5.38664	5.16343
32	38	FcARF8	5.48708	5.26227
32	39	FcARF8	5.58007	5.35366
32	40	FcARF8	5.63867	5.41066
33	1	FcARF9	0.0553761	-0.0162415
33	2	FcARF9	0.0584428	-0.0142614
33	3	FcARF9	0.0642761	-0.00951458
33	4	FcARF9	0.0677625	-0.00711476
33	5	FcARF9	0.0733629	-0.00260099
33	6	FcARF9	0.0776084	0.000557951
33	7	FcARF9	0.0805896	0.00245256
33	8	FcARF9	0.0827621	0.00353848
33	9	FcARF9	0.0836895	0.00337931
33	10	FcARF9	0.0856891	0.00429231
33	11	FcARF9	0.0857838	0.00330049
33	12	FcARF9	0.0866797	0.00310973
33	13	FcARF9	0.088447	0.00379046
33	14	FcARF9	0.088341	0.00259794
33	15	FcARF9	0.0883806	0.00155088
33	16	FcARF9	0.089024	0.00110773
33	17	FcARF9	0.0911198	0.00211694
33	18	FcARF9	0.0915004	0.00141097
33	19	FcARF9	0.0906611	-0.000514858
33	20	FcARF9	0.0914111	-0.000851522
33	21	FcARF9	0.0909055	-0.0024437
33	22	FcARF9	0.0920103	-0.0024254
33	23	FcARF9	0.0918569	-0.00366539
33	24	FcARF9	0.0927457	-0.00386321
33	25	FcARF9	0.0974841	-0.000211372
33	26	FcARF9	0.103392	0.00460973
33	27	FcARF9	0.117141	0.0172723
33	28	FcARF9	0.143683	0.0427279
33	29	FcARF9	0.194104	0.0920622
33	30	FcARF9	0.286059	0.18293
33	31	FcARF9	0.449445	0.34523
33	32	FcARF9	0.717388	0.612086
33	33	FcARF9	1.11095	1.00457
33	34	FcARF9	1.59955	1.49207
33	35	FcARF9	2.107	1.99843
33	36	FcARF9	2.54561	2.43596
33	37	FcARF9	2.89659	2.78585
33	38	FcARF9	3.17397	3.06215
33	39	FcARF9	3.37374	3.26083
33	40	FcARF9	3.5047	3.3907
34	1	FcARF10	0.281041	-0.00506102
34	2	FcARF10	0.282622	-0.00417402
34	3	FcARF10	0.284648	-0.00284102
34	4	FcARF10	0.286565	-0.00161812
34	5	FcARF10	0.287654	-0.00122289
34	6	FcARF10	0.288956	-0.000615137
34	7	FcARF10	0.292256	0.00199164
34	8	FcARF10	0.29374	0.00278142
34	9	FcARF10	0.293846	0.00219339
34	10	FcARF10	0.293812	0.00146602
34	11	FcARF10	0.294707	0.00166706
34	12	FcARF10	0.294497	0.000763542
34	13	FcARF10	0.294231	-0.000196487
34	14	FcARF10	0.295014	-0.000107264
34	15	FcARF10	0.295534	-0.000281704
34	16	FcARF10	0.294956	-0.00155311
34	17	FcARF10	0.294783	-0.00242024
34	18	FcARF10	0.296779	-0.00111735
34	19	FcARF10	0.299701	0.00111025
34	20	FcARF10	0.305568	0.00628336
34	21	FcARF10	0.316532	0.0165538
34	22	FcARF10	0.336779	0.0361065
34	23	FcARF10	0.38095	0.0795839
34	24	FcARF10	0.464122	0.162062
34	25	FcARF10	0.621687	0.318934
34	26	FcARF10	0.906873	0.603425
34	27	FcARF10	1.39399	1.08984
34	28	FcARF10	2.11451	1.80967
34	29	FcARF10	2.99539	2.68986
34	30	FcARF10	3.84437	3.53815
34	31	FcARF10	4.48247	4.17555
34	32	FcARF10	4.90546	4.59785
34	33	FcARF10	5.1855	4.8772
34	34	FcARF10	5.38883	5.07983
34	35	FcARF10	5.54903	5.23934
34	36	FcARF10	5.6633	5.35291
34	37	FcARF10	5.75132	5.44024
34	38	FcARF10	5.82205	5.51028
34	39	FcARF10	5.86188	5.54941
34	40	FcARF10	5.88794	5.57478
35	1	FcARF11	0.121766	-0.0173179
35	2	FcARF11	0.125332	-0.0151071
35	3	FcARF11	0.133902	-0.00789294
35	4	FcARF11	0.13955	-0.0036
35	5	FcARF11	0.143977	-0.000528065
35	6	FcARF11	0.146892	0.00103118
35	7	FcARF11	0.151092	0.00387534
35	8	FcARF11	0.151776	0.00320455
35	9	FcARF11	0.151079	0.0011518
35	10	FcARF11	0.153921	0.00263876
35	11	FcARF11	0.155435	0.00279718
35	12	FcARF11	0.156948	0.00295527
35	13	FcARF11	0.157081	0.00173244
35	14	FcARF11	0.157507	0.000803327
35	15	FcARF11	0.159059	0.000999951
35	16	FcARF11	0.158693	-0.000721606
35	17	FcARF11	0.159511	-0.00125833
35	18	FcARF11	0.160364	-0.0017609
35	19	FcARF11	0.160273	-0.00320736
35	20	FcARF11	0.162615	-0.0022206
35	21	FcARF11	0.167147	0.000956178
35	22	FcARF11	0.177456	0.00990907
35	23	FcARF11	0.196419	0.0275173
35	24	FcARF11	0.232701	0.0624436
35	25	FcARF11	0.302516	0.130903
35	26	FcARF11	0.432097	0.259129
35	27	FcARF11	0.662104	0.48778
35	28	FcARF11	1.03647	0.860789
35	29	FcARF11	1.55075	1.37371
35	30	FcARF11	2.14163	1.96324
35	31	FcARF11	2.69107	2.51132
35	32	FcARF11	3.10775	2.92665
35	33	FcARF11	3.39818	3.21573
35	34	FcARF11	3.60963	3.42582
35	35	FcARF11	3.77453	3.58936
35	36	FcARF11	3.88667	3.70015
35	37	FcARF11	3.96345	3.77557
35	38	FcARF11	4.02209	3.83286
35	39	FcARF11	4.0821	3.89151
35	40	FcARF11	4.10161	3.90967
36	1	FcARF12	0.218971	-0.0232519
36	2	FcARF12	0.222902	-0.0206558
36	3	FcARF12	0.230515	-0.0143769
36	4	FcARF12	0.238836	-0.00739093
36	5	FcARF12	0.248504	0.000942092
36	6	FcARF12	0.25437	0.0054734
36	7	FcARF12	0.25435	0.00411925
36	8	FcARF12	0.254952	0.00338628
36	9	FcARF12	0.257372	0.00447112
36	10	FcARF12	0.259926	0.00569097
36	11	FcARF12	0.259896	0.00432589
36	12	FcARF12	0.259644	0.00273932
36	13	FcARF12	0.259955	0.00171613
36	14	FcARF12	0.260631	0.00105763
36	15	FcARF12	0.261513	0.000604346
36	16	FcARF12	0.262277	3.36732e-05
36	17	FcARF12	0.261341	-0.00223734
36	18	FcARF12	0.26266	-0.00225271
36	19	FcARF12	0.26413	-0.0021173
36	20	FcARF12	0.263995	-0.00358681
36	21	FcARF12	0.266319	-0.00259808
36	22	FcARF12	0.271577	0.00132568
36	23	FcARF12	0.279579	0.00799324
36	24	FcARF12	0.29973	0.0268095
36	25	FcARF12	0.337934	0.0636783
36	26	FcARF12	0.410837	0.135247
36	27	FcARF12	0.544433	0.267508
36	28	FcARF12	0.78989	0.511631
36	29	FcARF12	1.21003	0.930432
36	30	FcARF12	1.8538	1.57287
36	31	FcARF12	2.67522	2.39296
36	32	FcARF12	3.49637	3.21277
36	33	FcARF12	4.13809	3.85315
36	34	FcARF12	4.58945	4.30319
36	35	FcARF12	4.92362	4.63602
36	36	FcARF12	5.15057	4.86163
36	37	FcARF12	5.33429	5.04402
36	38	FcARF12	5.46561	5.174
36	39	FcARF12	5.54879	5.25585
36	40	FcARF12	5.60968	5.3154
37	1	FcARF13	0.144337	-0.0125258
37	2	FcARF13	0.148758	-0.009582
37	3	FcARF13	0.157831	-0.00198673
37	4	FcARF13	0.163237	0.00194204
37	5	FcARF13	0.163678	0.000905204
37	6	FcARF13	0.163228	-0.00102236
37	7	FcARF13	0.16377	-0.00195754
37	8	FcARF13	0.167654	0.000449175
37	9	FcARF13	0.169825	0.00114284
37	10	FcARF13	0.17126	0.00109996
37	11	FcARF13	0.17221	0.000572847
37	12	FcARF13	0.174215	0.00110084
37	13	FcARF13	0.173853	-0.000739017
37	14	FcARF13	0.174978	-0.00109129
37	15	FcARF13	0.176936	-0.000610624
37	16	FcARF13	0.179176	0.000151587
37	17	FcARF13	0.180545	4.3079e-05
37	18	FcARF13	0.187135	0.00515583
37	19	FcARF13	0.197221	0.0137645
37	20	FcARF13	0.21866	0.0337263
37	21	FcARF13	0.259981	0.0735701
37	22	FcARF13	0.33999	0.152102
37	23	FcARF13	0.487187	0.297821
37	24	FcARF13	0.745035	0.554192
37	25	FcARF13	1.14677	0.954445
37	26	FcARF13	1.68924	1.49545
37	27	FcARF13	2.25721	2.06193
37	28	FcARF13	2.72591	2.52916
37	29	FcARF13	3.08217	2.88394
37	30	FcARF13	3.37161	3.1719
37	31	FcARF13	3.62255	3.42136
37	32	FcARF13	3.82291	3.62025
37	33	FcARF13	3.97106	3.76692
37	34	FcARF13	4.07983	3.87422
37	35	FcARF13	4.16009	3.953
37	36	FcARF13	4.23345	4.02487
37	37	FcARF13	4.29766	4.08761
37	38	FcARF13	4.34693	4.1354
37	39	FcARF13	4.37667	4.16366
37	40	FcARF13	4.39706	4.18257
38	1	FcARF14	0.0809232	-0.0122477
38	2	FcARF14	0.0843373	-0.0104246
38	3	FcARF14	0.0905234	-0.00582952
38	4	FcARF14	0.0965418	-0.00140212
38	5	FcARF14	0.0999563	0.000421328
38	6	FcARF14	0.102548	0.00142218
38	7	FcARF14	0.106135	0.00341749
38	8	FcARF14	0.107231	0.00292313
38	9	FcARF14	0.108739	0.00284028
38	10	FcARF14	0.108612	0.00112143
38	11	FcARF14	0.109534	0.000453052
38	12	FcARF14	0.111174	0.000501909
38	13	FcARF14	0.110957	-0.00130662
38	14	FcARF14	0.111737	-0.00211748
38	15	FcARF14	0.113549	-0.00189657
38	16	FcARF14	0.115266	-0.00177015
38	17	FcARF14	0.119849	0.00122166
38	18	FcARF14	0.127363	0.00714448
38	19	FcARF14	0.140818	0.0190085
38	20	FcARF14	0.168849	0.0454488
38	21	FcARF14	0.225098	0.100106
38	22	FcARF14	0.332856	0.206274
38	23	FcARF14	0.535938	0.407765
38	24	FcARF14	0.897705	0.767941
38	25	FcARF14	1.45898	1.32762
38	26	FcARF14	2.12635	1.9934
38	27	FcARF14	2.69363	2.5591
38	28	FcARF14	3.13901	3.00288
38	29	FcARF14	3.57926	3.44154
38	30	FcARF14	3.97689	3.83758
38	31	FcARF14	4.27156	4.13066
38	32	FcARF14	4.4979	4.3554
38	33	FcARF14	4.67021	4.52613
38	34	FcARF14	4.80347	4.6578
38	35	FcARF14	4.90959	4.76233
38	36	FcARF14	4.99994	4.85109
38	37	FcARF14	5.05331	4.90286
38	38	FcARF14	5.10976	4.95772
38	39	FcARF14	5.1471	4.99347
38	40	FcARF14	5.16812	5.0129
39	1	FcARF15	0.0291725	-0.0164949
39	2	FcARF15	0.0322867	-0.0140338
39	3	FcARF15	0.0380211	-0.00895234
39	4	FcARF15	0.042881	-0.00474548
39	5	FcARF15	0.0474167	-0.000862714
39	6	FcARF15	0.0511041	0.00217174
39	7	FcARF15	0.0528717	0.00328633
39	8	FcARF15	0.0530426	0.00280421
39	9	FcARF15	0.0530668	0.00217548
39	10	FcARF15	0.0530388	0.00149444
39	11	FcARF15	0.0544171	0.00221974
39	12	FcARF15	0.0568135	0.00396326
39	13	FcARF15	0.0574192	0.0039159
39	14	FcARF15	0.056549	0.00239275
39	15	FcARF15	0.0552457	0.000436462
39	16	FcARF15	0.0554361	-2.60953e-05
39	17	FcARF15	0.0561337	1.84412e-05
39	18	FcARF15	0.0554966	-0.00127157
39	19	FcARF15	0.0564089	-0.00101226
39	20	FcARF15	0.0563603	-0.00171381
39	21	FcARF15	0.0568328	-0.00189437
39	22	FcARF15	0.0568584	-0.00252176
39	23	FcARF15	0.0567119	-0.0033212
39	24	FcARF15	0.0581421	-0.00254398
39	25	FcARF15	0.0615595	0.000220432
39	26	FcARF15	0.0657584	0.0037664
39	27	FcARF15	0.0720259	0.00938081
39	28	FcARF15	0.0846026	0.0213046
39	29	FcARF15	0.109748	0.0457965
39	30	FcARF15	0.158411	0.0938073
39	31	FcARF15	0.249505	0.184248
39	32	FcARF15	0.414755	0.348845
39	33	FcARF15	0.686412	0.619849
39	34	FcARF15	1.07777	1.01056
39	35	FcARF15	1.58647	1.5186
39	36	FcARF15	2.20488	2.13636
39	37	FcARF15	2.87565	2.80647
39	38	FcARF15	3.50108	3.43125
39	39	FcARF15	4.04202	3.97154
39	40	FcARF15	4.41519	4.34406
40	1	FcARF16	0.0719802	-0.0241322
40	2	FcARF16	0.0762256	-0.0213216
40	3	FcARF16	0.0849641	-0.0140178
40	4	FcARF16	0.0926194	-0.00779728
40	5	FcARF16	0.097781	-0.00407045
40	6	FcARF16	0.102445	-0.00084142
40	7	FcARF16	0.107049	0.00232814
40	8	FcARF16	0.11172	0.00556406
40	9	FcARF16	0.115663	0.00807247
40	10	FcARF16	0.116263	0.00723732
40	11	FcARF16	0.117118	0.00665774
40	12	FcARF16	0.117926	0.00603115
40	13	FcARF16	0.117163	0.00383332
40	14	FcARF16	0.117285	0.00252087
40	15	FcARF16	0.119439	0.00324
40	16	FcARF16	0.118702	0.00106857
40	17	FcARF16	0.117865	-0.0012037
40	18	FcARF16	0.118123	-0.00238036
40	19	FcARF16	0.119202	-0.00273624
40	20	FcARF16	0.120052	-0.00332076
40	21	FcARF16	0.12078	-0.00402806
40	22	FcARF16	0.121939	-0.00430327
40	23	FcARF16	0.125823	-0.0018543
40	24	FcARF16	0.131848	0.0027363
40	25	FcARF16	0.144241	0.013694
40	26	FcARF16	0.169663	0.0376815
40	27	FcARF16	0.218152	0.0847356
40	28	FcARF16	0.30891	0.174059
40	29	FcARF16	0.479989	0.343703
40	30	FcARF16	0.777824	0.640104
40	31	FcARF16	1.26926	1.1301
40	32	FcARF16	1.97707	1.83648
40	33	FcARF16	2.81092	2.66889
40	34	FcARF16	3.55433	3.41087
40	35	FcARF16	4.07782	3.93292
40	36	FcARF16	4.48168	4.33535
40	37	FcARF16	4.81712	4.66935
40	38	FcARF16	5.07658	4.92739
40	39	FcARF16	5.2764	5.12577
40	40	FcARF16	5.40454	5.25247
41	1	FcARF17	0.149452	-0.0179354
41	2	FcARF17	0.15331	-0.0146872
41	3	FcARF17	0.161295	-0.00731249
41	4	FcARF17	0.16733	-0.00188808
41	5	FcARF17	0.172597	0.00276857
41	6	FcARF17	0.176256	0.00581729
41	7	FcARF17	0.176226	0.00517618
41	8	FcARF17	0.174645	0.00298486
41	9	FcARF17	0.172168	-0.000102495
41	10	FcARF17	0.17115	-0.00173117
41	11	FcARF17	0.171715	-0.0017757
41	12	FcARF17	0.173419	-0.000682338
41	13	FcARF17	0.173288	-0.00142357
41	14	FcARF17	0.172404	-0.00291858
41	15	FcARF17	0.174192	-0.00174046
41	16	FcARF17	0.175942	-0.000601419
41	17	FcARF17	0.177201	4.72904e-05
41	18	FcARF17	0.181146	0.00338213
41	19	FcARF17	0.186632	0.00825753
41	20	FcARF17	0.196191	0.0172062
41	21	FcARF17	0.21413	0.034535
41	22	FcARF17	0.252053	0.0718478
41	23	FcARF17	0.320685	0.139869
41	24	FcARF17	0.452597	0.271171
41	25	FcARF17	0.700357	0.51832
41	26	FcARF17	1.12505	0.9424
41	27	FcARF17	1.77617	1.59291
41	28	FcARF17	2.60035	2.41648
41	29	FcARF17	3.44535	3.26088
41	30	FcARF17	4.1191	3.93401
41	31	FcARF17	4.58864	4.40294
41	32	FcARF17	4.90348	4.71718
41	33	FcARF17	5.12381	4.93689
41	34	FcARF17	5.2791	5.09157
41	35	FcARF17	5.39489	5.20675
41	36	FcARF17	5.48302	5.29427
41	37	FcARF17	5.54263	5.35327
41	38	FcARF17	5.58472	5.39475
41	39	FcARF17	5.61509	5.4245
41	40	FcARF17	5.6271	5.4359
42	1	FcARF18	0.144497	-0.0286258
42	2	FcARF18	0.149548	-0.0234232
42	3	FcARF18	0.158348	-0.0144716
42	4	FcARF18	0.16638	-0.00628811
42	5	FcARF18	0.172188	-0.000329034
42	6	FcARF18	0.17527	0.002905
42	7	FcARF18	0.178614	0.00640015
42	8	FcARF18	0.181679	0.00961649
42	9	FcARF18	0.182557	0.0106458
42	10	FcARF18	0.179276	0.00751627
42	11	FcARF18	0.17623	0.00462228
42	12	FcARF18	0.170934	-0.00052192
42	13	FcARF18	0.169069	-0.00223601
42	14	FcARF18	0.168289	-0.00286398
42	15	FcARF18	0.16808	-0.00292222
42	16	FcARF18	0.168396	-0.00245406
42	17	FcARF18	0.168333	-0.00236542
42	18	FcARF18	0.168403	-0.00214452
42	19	FcARF18	0.168394	-0.00200173
42	20	FcARF18	0.167948	-0.00229593
42	21	FcARF18	0.167786	-0.00230652
42	22	FcARF18	0.168313	-0.00162863
42	23	FcARF18	0.167917	-0.0018723
42	24	FcARF18	0.167386	-0.00225251
42	25	FcARF18	0.167783	-0.00170345
42	26	FcARF18	0.169648	0.000312355
42	27	FcARF18	0.170269	0.00108533
42	28	FcARF18	0.171034	0.00200218
42	29	FcARF18	0.174433	0.00555204
42	30	FcARF18	0.178763	0.0100336
42	31	FcARF18	0.186223	0.0176451
42	32	FcARF18	0.197436	0.0290097
42	33	FcARF18	0.218665	0.0503903
42	34	FcARF18	0.256339	0.0882155
42	35	FcARF18	0.323579	0.155608
42	36	FcARF18	0.445069	0.277249
42	37	FcARF18	0.65268	0.485012
42	38	FcARF18	0.988483	0.820965
42	39	FcARF18	1.47845	1.31108
42	40	FcARF18	1.99945	1.83224
43	1	FcARF19	0.0361406	-0.0114978
43	2	FcARF19	0.0385732	-0.00941327
43	3	FcARF19	0.0451754	-0.00315922
43	4	FcARF19	0.0477616	-0.000921178
43	5	FcARF19	0.0500627	0.0010318
43	6	FcARF19	0.0506887	0.00130968
43	7	FcARF19	0.0503631	0.000635927
43	8	FcARF19	0.0506238	0.000548552
43	9	FcARF19	0.0503009	-0.000122487
43	10	FcARF19	0.0514165	0.000644988
43	11	FcARF19	0.0511013	-1.83623e-05
43	12	FcARF19	0.0514375	-3.02519e-05
43	13	FcARF19	0.0524102	0.000594306
43	14	FcARF19	0.0535675	0.0014035
43	15	FcARF19	0.053975	0.00146288
43	16	FcARF19	0.0530294	0.000169072
43	17	FcARF19	0.052981	-0.000227417
43	18	FcARF19	0.0533927	-0.000163821
43	19	FcARF19	0.0522793	-0.00162537
43	20	FcARF19	0.0517135	-0.00253927
43	21	FcARF19	0.0537658	-0.000835144
43	22	FcARF19	0.0567909	0.00184181
43	23	FcARF19	0.0616413	0.00634418
43	24	FcARF19	0.0697013	0.014056
43	25	FcARF19	0.0892872	0.0332938
43	26	FcARF19	0.1266	0.0702584
43	27	FcARF19	0.199556	0.142867
43	28	FcARF19	0.340759	0.283722
43	29	FcARF19	0.602309	0.544923
43	30	FcARF19	1.04975	0.992016
43	31	FcARF19	1.74872	1.69063
43	32	FcARF19	2.65493	2.5965
43	33	FcARF19	3.56331	3.50454
43	34	FcARF19	4.23066	4.17154
43	35	FcARF19	4.62785	4.56838
43	36	FcARF19	4.88978	4.82996
43	37	FcARF19	5.08323	5.02305
43	38	FcARF19	5.20705	5.14653
43	39	FcARF19	5.29302	5.23216
43	40	FcARF19	5.33346	5.27225
44	1	FcARF20	0.0158707	-0.0180382
44	2	FcARF20	0.0192903	-0.0154176
44	3	FcARF20	0.0275192	-0.00798753
44	4	FcARF20	0.0322914	-0.00401417
44	5	FcARF20	0.0371058	1.32518e-06
44	6	FcARF20	0.0406143	0.00271083
44	7	FcARF20	0.0409642	0.00226185
44	8	FcARF20	0.0407865	0.00128526
44	9	FcARF20	0.0433606	0.00306048
44	10	FcARF20	0.0437686	0.00266956
44	11	FcARF20	0.0431367	0.00123874
44	12	FcARF20	0.044485	0.00178815
44	13	FcARF20	0.0448347	0.00133899
44	14	FcARF20	0.0461353	0.00184062
44	15	FcARF20	0.0473692	0.00227568
44	16	FcARF20	0.0463586	0.000466176
44	17	FcARF20	0.0464602	-0.000231123
44	18	FcARF20	0.0465098	-0.00098051
44	19	FcARF20	0.0468752	-0.00141392
44	20	FcARF20	0.0476689	-0.00141914
44	21	FcARF20	0.0470178	-0.00286921
44	22	FcARF20	0.0466708	-0.00401503
44	23	FcARF20	0.0503672	-0.0011176
44	24	FcARF20	0.0553942	0.00311056
44	25	FcARF20	0.0614095	0.00832688
44	26	FcARF20	0.077819	0.0239375
44	27	FcARF20	0.109081	0.054401
44	28	FcARF20	0.168464	0.112985
44	29	FcARF20	0.285899	0.229621
44	30	FcARF20	0.501466	0.444389
44	31	FcARF20	0.87831	0.820434
44	32	FcARF20	1.4917	1.43303
44	33	FcARF20	2.34893	2.28945
44	34	FcARF20	3.29754	3.23727
44	35	FcARF20	4.06947	4.00839
44	36	FcARF20	4.55842	4.49655
44	37	FcARF20	4.88957	4.8269
44	38	FcARF20	5.12468	5.06121
44	39	FcARF20	5.2876	5.22333
44	40	FcARF20	5.3835	5.31844
45	1	Actin	-0.00579002	-0.00893779
45	2	Actin	-0.00285881	-0.00715116
45	3	Actin	0.00232198	-0.00311495
45	4	Actin	0.00669314	0.000111635
45	5	Actin	0.00845464	0.000728552
45	6	Actin	0.00924848	0.000377815
45	7	Actin	0.0117203	0.00170511
45	8	Actin	0.0133003	0.00214044
45	9	Actin	0.0137666	0.00146218
45	10	Actin	0.0135806	0.00013163
45	11	Actin	0.0144544	-0.000139124
45	12	Actin	0.0155018	-0.000236303
45	13	Actin	0.0162428	-0.000639924
45	14	Actin	0.0172903	-0.000737008
45	15	Actin	0.0169553	-0.00221656
45	16	Actin	0.0182416	-0.0020748
45	17	Actin	0.0204673	-0.000993673
45	18	Actin	0.023216	0.00061041
45	19	Actin	0.0266347	0.00288457
45	20	Actin	0.0351731	0.0102784
45	21	Actin	0.0505992	0.0245599
45	22	Actin	0.080233	0.0530491
45	23	Actin	0.129158	0.10083
45	24	Actin	0.218113	0.18864
45	25	Actin	0.374359	0.343741
45	26	Actin	0.626169	0.594407
45	27	Actin	0.998002	0.965095
45	28	Actin	1.46297	1.42891
45	29	Actin	1.92684	1.89165
45	30	Actin	2.31418	2.27784
45	31	Actin	2.60646	2.56898
45	32	Actin	2.82741	2.78878
45	33	Actin	2.98605	2.94628
45	34	Actin	3.09117	3.05025
45	35	Actin	3.15599	3.11393
45	36	Actin	3.1854	3.1422
45	37	Actin	3.21045	3.16609
45	38	Actin	3.21799	3.17249
45	39	Actin	3.22456	3.17791
45	40	Actin	3.23173	3.18394
46	1	FcARF2	0.266066	-0.0110235
46	2	FcARF2	0.271325	-0.00671585
46	3	FcARF2	0.2805	0.00150801
46	4	FcARF2	0.285836	0.00589191
46	5	FcARF2	0.285337	0.00444108
46	6	FcARF2	0.281785	-6.24092e-05
46	7	FcARF2	0.279827	-0.00297117
46	8	FcARF2	0.279518	-0.00423246
46	9	FcARF2	0.280504	-0.00419741
46	10	FcARF2	0.284067	-0.00158613
46	11	FcARF2	0.28542	-0.00118519
46	12	FcARF2	0.286305	-0.00125117
46	13	FcARF2	0.289005	0.000497094
46	14	FcARF2	0.289351	-0.000108307
46	15	FcARF2	0.289865	-0.00054619
46	16	FcARF2	0.29069	-0.000673055
46	17	FcARF2	0.290945	-0.00136944
46	18	FcARF2	0.292341	-0.000924758
46	19	FcARF2	0.294283	6.49505e-05
46	20	FcARF2	0.296835	0.00166546
46	21	FcARF2	0.30116	0.0050392
46	22	FcARF2	0.309466	0.0123936
46	23	FcARF2	0.32497	0.026946
46	24	FcARF2	0.357508	0.0585325
46	25	FcARF2	0.419612	0.119685
46	26	FcARF2	0.538308	0.237429
46	27	FcARF2	0.757256	0.455426
46	28	FcARF2	1.1347	0.83192
46	29	FcARF2	1.71158	1.40784
46	30	FcARF2	2.45416	2.14947
46	31	FcARF2	3.22105	2.91541
46	32	FcARF2	3.83761	3.53102
46	33	FcARF2	4.22892	3.92138
46	34	FcARF2	4.49123	4.18273
46	35	FcARF2	4.67748	4.36804
46	36	FcARF2	4.81068	4.50028
46	37	FcARF2	4.91078	4.59943
46	38	FcARF2	4.96608	4.65378
46	39	FcARF2	5.01576	4.70251
46	40	FcARF2	5.05152	4.73732
47	1	FcARF2	0.351963	-0.0403274
47	2	FcARF2	0.359526	-0.0342725
47	3	FcARF2	0.375304	-0.0200023
47	4	FcARF2	0.387896	-0.00891789
47	5	FcARF2	0.395688	-0.00263289
47	6	FcARF2	0.40479	0.00496132
47	7	FcARF2	0.413543	0.0122068
47	8	FcARF2	0.415496	0.0126524
47	9	FcARF2	0.41368	0.0093285
47	10	FcARF2	0.409576	0.0037171
47	11	FcARF2	0.408721	0.00135418
47	12	FcARF2	0.411709	0.00283457
47	13	FcARF2	0.41158	0.00119838
47	14	FcARF2	0.410699	-0.00119052
47	15	FcARF2	0.41161	-0.00178685
47	16	FcARF2	0.413324	-0.00158009
47	17	FcARF2	0.413637	-0.00277559
47	18	FcARF2	0.413875	-0.00404512
47	19	FcARF2	0.41685	-0.00257692
47	20	FcARF2	0.418788	-0.00214739
47	21	FcARF2	0.421845	-0.000597651
47	22	FcARF2	0.429392	0.00544232
47	23	FcARF2	0.445177	0.0197196
47	24	FcARF2	0.471121	0.0441556
47	25	FcARF2	0.525031	0.0965584
47	26	FcARF2	0.629483	0.199503
47	27	FcARF2	0.82601	0.394522
47	28	FcARF2	1.1725	0.739505
47	29	FcARF2	1.726	1.2915
47	30	FcARF2	2.49732	2.06131
47	31	FcARF2	3.37091	2.93339
47	32	FcARF2	4.14136	3.70234
47	33	FcARF2	4.67531	4.23478
47	34	FcARF2	5.00219	4.56014
47	35	FcARF2	5.21306	4.76952
47	36	FcARF2	5.36982	4.92476
47	37	FcARF2	5.48947	5.04291
47	38	FcARF2	5.57639	5.12832
47	39	FcARF2	5.63426	5.18468
47	40	FcARF2	5.66682	5.21573
48	1	FcARF2	0.335424	-0.0226142
48	2	FcARF2	0.34049	-0.017149
48	3	FcARF2	0.352342	-0.00489732
48	4	FcARF2	0.357187	0.00034608
48	5	FcARF2	0.362024	0.00558262
48	6	FcARF2	0.36238	0.00633809
48	7	FcARF2	0.362313	0.00667074
48	8	FcARF2	0.359468	0.00422487
48	9	FcARF2	0.354844	3.10415e-07
48	10	FcARF2	0.351008	-0.00343643
48	11	FcARF2	0.349817	-0.0042283
48	12	FcARF2	0.348849	-0.00479677
48	13	FcARF2	0.347328	-0.00591918
48	14	FcARF2	0.347315	-0.00553273
48	15	FcARF2	0.347917	-0.00453116
48	16	FcARF2	0.348662	-0.00338716
48	17	FcARF2	0.350472	-0.0011777
48	18	FcARF2	0.350902	-0.000348061
48	19	FcARF2	0.352457	0.00160599
48	20	FcARF2	0.356012	0.00556065
48	21	FcARF2	0.357978	0.00792547
48	22	FcARF2	0.36636	0.0167069
48	23	FcARF2	0.382328	0.0330738
48	24	FcARF2	0.411971	0.0631162
48	25	FcARF2	0.473599	0.125143
48	26	FcARF2	0.590571	0.242515
48	27	FcARF2	0.803293	0.455637
48	28	FcARF2	1.17044	0.823186
48	29	FcARF2	1.73963	1.39277
48	30	FcARF2	2.46443	2.11797
48	31	FcARF2	3.21805	2.87199
48	32	FcARF2	3.84669	3.50103
48	33	FcARF2	4.26221	3.91695
48	34	FcARF2	4.51969	4.17483
48	35	FcARF2	4.70384	4.35938
48	36	FcARF2	4.82268	4.47862
48	37	FcARF2	4.9191	4.57544
48	38	FcARF2	4.99116	4.6479
48	39	FcARF2	5.05044	4.70758
48	40	FcARF2	5.08359	4.74112
49	1	FcARF1	3.5401	0.593529
49	2	FcARF1	3.36559	0.421481
49	3	FcARF1	3.16899	0.227352
49	4	FcARF1	3.16994	0.23076
49	5	FcARF1	3.18205	0.245335
49	6	FcARF1	3.13338	0.199136
49	7	FcARF1	3.13267	0.200888
49	8	FcARF1	3.04739	0.11807
49	9	FcARF1	3.06283	0.135982
49	10	FcARF1	3.09038	0.165992
49	11	FcARF1	2.97607	0.0541464
49	12	FcARF1	2.79961	-0.119844
49	13	FcARF1	2.72321	-0.193783
49	14	FcARF1	2.65029	-0.264234
49	15	FcARF1	2.57713	-0.33493
49	16	FcARF1	2.75306	-0.156529
49	17	FcARF1	2.90297	-0.00415465
49	18	FcARF1	2.92739	0.0227296
49	19	FcARF1	2.8521	-0.0500981
49	20	FcARF1	2.66028	-0.239455
49	21	FcARF1	2.72296	-0.174308
49	22	FcARF1	2.76479	-0.130005
49	23	FcARF1	2.90613	0.0137989
49	24	FcARF1	2.85489	-0.0349778
49	25	FcARF1	2.55599	-0.331417
49	26	FcARF1	2.59944	-0.285498
49	27	FcARF1	2.60195	-0.280524
49	28	FcARF1	2.43788	-0.442131
49	29	FcARF1	2.71238	-0.165162
49	30	FcARF1	2.89374	0.0186587
49	31	FcARF1	2.97951	0.106896
49	32	FcARF1	3.06812	0.197971
49	33	FcARF1	2.9044	0.0367229
49	34	FcARF1	2.87155	0.00633589
49	35	FcARF1	2.93628	0.0735257
49	36	FcARF1	2.86566	0.00537535
49	37	FcARF1	3.09415	0.236329
49	38	FcARF1	3.30778	0.452424
49	39	FcARF1	3.31151	0.45862
49	40	FcARF1	3.28065	0.430227
50	1	FcARF2	0.0242511	-0.00357506
50	2	FcARF2	0.0261529	-0.00055868
[truncated: 13,398 more rows]

## Sheet: Results
Block Type	384-Well Block
Calibration Background is expired	No
Calibration Background performed on	12-23-2020
Calibration Pure Dye FAM is expired	No
Calibration Pure Dye FAM performed on	12-23-2020
Calibration Pure Dye NED is expired	No
Calibration Pure Dye NED performed on	12-23-2020
Calibration Pure Dye ROX is expired	No
Calibration Pure Dye ROX performed on	12-23-2020
Calibration Pure Dye SYBR is expired	No
Calibration Pure Dye SYBR performed on	12-23-2020
Calibration Pure Dye TAMRA is expired	No
Calibration Pure Dye TAMRA performed on	12-23-2020
Calibration Pure Dye VIC is expired	No
Calibration Pure Dye VIC performed on	12-23-2020
Calibration RNaseP is expired	No
Calibration RNaseP performed on	11-03-2016
Calibration ROI is expired	No
Calibration ROI performed on	12-23-2020
Calibration Uniformity is expired	No
Calibration Uniformity performed on	12-23-2020
Chemistry	SYBR_GREEN
Date Created	2021-12-16 20:20:14 PM CST
Experiment Barcode
Experiment Comment
Experiment File Name	C:\Users\zgnyd\Documents\WeChat Files\wxid_3g6h1irk34e722\FileStorage\File\2022-04\2021-12-16 tissues.eds
Experiment Name	2021-12-16 202009
Experiment Run End Time	2010-01-05 03:43:04 AM CST
Experiment Type	Comparative Cт (ΔΔCт)
Instrument Name	278861484
Instrument Serial Number	278861484
Instrument Type	QuantStudio(TM) 6 Flex System
Passive Reference	ROX
Quantification Cycle Method	Ct
Signal Smoothing On	true
Stage/ Cycle where Analysis is performed	Stage 2, Step 2
User Name
Well	Well Position	Omit	Sample Name	Target Name	Task	Reporter	Quencher	Quantity	Quantity Mean	Quantity SD											Automatic Ct Threshold	Ct Threshold	Automatic Baseline	Baseline Start	Baseline End	Comments	Amp Score	Cq Conf	Tm1	Tm2	Tm3	BADROX	HIGHSD	NOISE	SPIKE	NOSIGNAL	OUTLIERRG	EXPFAIL	THOLDFAIL	PRFLOW	PRFDROP	MTP
1	A1	FALSE	Root	FcARF1	UNKNOWN	SYBR	None														TRUE	0.2	TRUE	1	40		1.10748	0.00582466	68.9865			N	Y	N	N	N	N	N	Y	Y	N	N
2	A2	FALSE	Root	FcARF2	UNKNOWN	SYBR	None				RQ	RQ Min	RQ Max	CT	Ct Mean	Ct SD	Delta Ct	Delta Ct Mean	Delta Ct SE	Delta Delta Ct	TRUE	0.377308	TRUE	1	40		1.5692	0.980927	83.9737			N	N	N	N	N	N	N	N	N	N	N
3	A3	FALSE	Root	FcARF3	UNKNOWN	SYBR	None				148.294	16.5267	3022.62	25.51	23.0324	3.50377		-12.3916	3.07586	-13.8355	TRUE	0.04	TRUE	1	40		1.15558	0.901472	81.6073			N	Y	N	N	N	N	N	Y	N	N	N
4	A4	FALSE	Root	FcARF4	UNKNOWN	SYBR	None				104.147	3.11498	3482.11	26.9687	26.9738	0.0945953		-8.45028	1.82365	-6.70248	TRUE	0.526067	TRUE	1	40		1.59213	0.985079	82.2646			N	Y	N	N	N	N	N	N	N	N	N
5	A5	FALSE	Root	FcARF5	UNKNOWN	SYBR	None				253.491	1.0049	3944.7	27.7157	31.3614	3.84796		-4.06267	2.87373	-7.98579	TRUE	0.155571	TRUE	1	40		1.42908	0.974306	82.1332	76.6115		N	Y	N	N	N	N	N	N	N	N	Y
6	A6	FALSE	Root	FcARF6	UNKNOWN	SYBR	None				163.28	4.4907	5936.82	27.4865	28.2768	0.701092		-7.1473	1.86723	-7.35121	TRUE	0.267971	TRUE	1	40		1.52781	0.979662	83.9737	75.2969		N	Y	N	N	N	N	N	N	N	N	Y
7	A7	FALSE	Root	FcARF7	UNKNOWN	SYBR	None				25.3674	0.710473	905.743	28.6242	29.2309	0.621305		-6.19319	1.85779	-4.6649	TRUE	0.241364	TRUE	1	40		1.5019	0.979111	82.2646			N	Y	N	N	N	N	N	N	N	N	N
8	A8	FALSE	Root	FcARF8	UNKNOWN	SYBR	None				53.7142	1.43528	2010.21	31.0647	30.8256	0.812521		-4.59845	1.88223	-5.74723	TRUE	0.283002	TRUE	1	40		1.58403	0.982182	83.9737			N	N	N	N	N	N	N	N	N	N	N
9	A9	FALSE	Root	FcARF9	UNKNOWN	SYBR	None				120.453	2.94245	4930.86	25.7035	26.4868	1.09228		-8.93725	1.92883	-6.91232	TRUE	0.34101	TRUE	1	40		1.51599	0.975551	84.1052			N	Y	N	N	N	N	N	N	N	N	N
10	A10	FALSE	Root	FcARF10	UNKNOWN	SYBR	None				57.6991	1.71621	1939.85	27.2412	27.0089	0.201183		-8.41517	1.82653	-5.85048	TRUE	0.556608	TRUE	1	40		1.59735	0.990661	83.8422			N	N	N	N	N	N	N	N	N	N	N
11	A11	FALSE	Root	FcARF11	UNKNOWN	SYBR	None				168.238	4.39181	6444.76	29.2768	29.9633	0.893032		-5.46082	1.89435	-7.39436	TRUE	0.386811	TRUE	1	40		1.53047	0.992834	83.7108			N	N	N	N	N	N	N	N	N	N	N
12	A12	FALSE	Root	FcARF12	UNKNOWN	SYBR	None				120.269	3.58755	4031.93	25.7543	25.8912	0.155548		-9.53287	1.82504	-6.91013	TRUE	0.558734	TRUE	1	40		1.60618	0.980496	83.8422			N	N	N	N	N	N	N	N	N	N	N
13	A13	FALSE	Root	FcARF13	UNKNOWN	SYBR	None				86.3277	2.5127	2965.92	25.8398	26.1405	0.405258		-9.28358	1.83779	-6.43175	TRUE	0.344091	TRUE	1	40		1.50297	0.971994	81.2129			N	N	N	N	N	N	N	N	N	N	N
14	A14	FALSE	Root	FcARF14	UNKNOWN	SYBR	None				94.2237	2.81953	3148.8	28.0767	28.1358	0.0788102		-7.28823	1.8234	-6.55802	TRUE	0.297491	TRUE	1	40		1.51924	0.979922	82.5276			N	N	N	N	N	N	N	N	N	N	N
15	A15	FALSE	Root	FcARF15	UNKNOWN	SYBR	None				25.0017	21.6604	24266.7	23.0416	23.0657	0.123365		-12.3583	1.82422	-9.50184	TRUE	0.203861	TRUE	1	40		1.49687	0.984291	88.0492	78.715		N	Y	N	N	N	N	N	N	N	N	Y
16	A16	FALSE	Root	FcARF16	UNKNOWN	SYBR	None				70.6232	8.10557	9035.38	22.5964	22.5656	0.0306503		-12.8585	1.82292	-8.08014	TRUE	0.492056	TRUE	1	40		1.58576	0.971325	86.3401			N	N	N	N	N	N	N	N	N	N	N
17	A17	FALSE	Root	FcARF17	UNKNOWN	SYBR	None				18.496	0.512435	667.6	30.6611	30.5434	0.670024		-4.88064	1.86343	-4.20914	TRUE	0.477253	TRUE	1	40		1.55135	0.965998	82.3961			N	N	N	N	N	N	N	N	N	N	N
18	A18	FALSE	Root	FcARF18	UNKNOWN	SYBR	None				63.4771	1.89303	2128.52	29.2815	29.466	0.159794		-5.95809	1.82516	-5.98816	TRUE	0.46441	TRUE	1	40		1.58674	0.984466	83.1849			N	Y	N	N	N	N	N	N	N	N	N
19	A19	FALSE	Root	FcARF19	UNKNOWN	SYBR	None				113.33	3.36543	3816.35	25.2913	25.0401	0.222957		-10.384	1.82737	-6.82438	TRUE	0.529257	TRUE	1	40		1.59144	0.976747	82.1332			N	N	N	N	N	N	N	N	N	N	N
20	A20	FALSE	Root	FcARF20	UNKNOWN	SYBR	None							31.7975	35.4241	3.15724					TRUE	0.300923	TRUE	1	40		1.58396	0.981705	83.9737			N	Y	N	N	N	N	N	N	N	N	N
21	A21	FALSE	Root	Actin	UNKNOWN	SYBR	None				27.5075	0.806889	937.751	29.5989	29.3482	0.346117		-6.07583	1.83375	-4.78175	TRUE	0.402462	TRUE	1	40		1.48963	0.962206	85.5513			N	Y	N	N	N	N	N	N	N	N	N
22	A22	FALSE	Peel	FcARF1	UNKNOWN	SYBR	None				104.98	2.41122	4570.66	30.2799	30.5359	1.2517		-4.8882	1.96086	-6.71398	TRUE	0.2	TRUE	1	40		1.10272	0	93.5708			N	N	N	N	N	N	Y	Y	Y	N	N
23	A23	FALSE	Peel	FcARF1	UNKNOWN	SYBR	None				66.8913	1.89127	2365.84	25.5811	25.0963	0.575542		-10.3277	1.85287	-6.06375	TRUE	0.2	TRUE	1	40		0.999439	0.0971727	80.8185			N	N	N	N	N	N	N	Y	Y	Y	N
24	A24	FALSE	Peel	FcARF1	UNKNOWN	SYBR	None				1	0.400271	2.49831	27.1208	28.1402	1.10259					TRUE	0.2	TRUE	1	40		1.17145	0	84.4996			N	N	N	N	N	N	N	Y	Y	N	N
25	B1	FALSE	Root	FcARF1	UNKNOWN	SYBR	None				1	0.400271	2.49831	28.8689	28.1402	1.10259		0.791995		-0.651865	TRUE	0.2	TRUE	1	40		0	0.338855	92.1246			N	Y	Y	Y	N	N	N	Y	Y	Y	N
26	B2	FALSE	Root	FcARF2	UNKNOWN	SYBR	None				1	0.400271	2.49831	28.4309	28.1402	1.10259					TRUE	0.377308	TRUE	1	40		1.56344	0.982729	83.9737			N	N	N	N	N	N	N	N	N	N	N
27	B3	FALSE	Root	FcARF3	UNKNOWN	SYBR	None				148.294	16.5267	3022.62	22.5549	23.0324	3.50377		-12.3916	3.07586	-13.8355	TRUE	0.04	TRUE	1	40		0.573514	0	82.0017			N	Y	N	N	N	N	N	Y	N	N	N
28	B4	FALSE	Root	FcARF4	UNKNOWN	SYBR	None				104.147	3.11498	3482.11	27.0709	26.9738	0.0945953		-8.45028	1.82365	-6.70248	TRUE	0.526067	TRUE	1	40		1.57347	0.980579	82.1332			N	Y	N	N	N	N	N	N	N	N	N
29	B5	FALSE	Root	FcARF5	UNKNOWN	SYBR	None				253.491	1.0049	63944.7	35.3839	31.3614	3.84796		-4.06267	2.87373	-7.98579	TRUE	0.155571	TRUE	1	40		1.38564	0.970768	82.1332			N	Y	N	N	N	N	N	N	N	N	N
30	B6	FALSE	Root	FcARF6	UNKNOWN	SYBR	None				163.28	4.4907	5936.82	28.52	28.2768	0.701092		-7.1473	1.86723	-7.35121	TRUE	0.267971	TRUE	1	40		1.5301	0.985634	84.3681	75.1654		N	Y	N	N	N	N	N	N	N	N	Y
31	B7	FALSE	Root	FcARF7	UNKNOWN	SYBR	None				25.3674	0.710473	905.743	29.8659	29.2309	0.621305		-6.19319	1.85779	-4.6649	TRUE	0.241364	TRUE	1	40		1.42526	0.963108	82.1332			N	Y	N	N	N	N	N	N	N	N	N
32	B8	FALSE	Root	FcARF8	UNKNOWN	SYBR	None				53.7142	1.43528	2010.21	29.9204	30.8256	0.812521		-4.59845	1.88223	-5.74723	TRUE	0.283002	TRUE	1	40		1.59074	0.976666	83.9737			N	N	N	N	N	N	N	N	N	N	N
33	B9	FALSE	Root	FcARF9	UNKNOWN	SYBR	None				120.453	2.94245	4930.86	27.7346	26.4868	1.09228		-8.93725	1.92883	-6.91232	TRUE	0.34101	TRUE	1	40		1.4805	0.973694	83.9737			N	Y	N	N	N	N	N	N	N	N	N
34	B10	FALSE	Root	FcARF10	UNKNOWN	SYBR	None				57.6991	1.71621	1939.85	26.8912	27.0089	0.201183		-8.41517	1.82653	-5.85048	TRUE	0.556608	TRUE	1	40		1.59436	0.987742	83.8422			N	N	N	N	N	N	N	N	N	N	N
35	B11	FALSE	Root	FcARF11	UNKNOWN	SYBR	None				168.238	4.39181	6444.76	30.9729	29.9633	0.893032		-5.46082	1.89435	-7.39436	TRUE	0.386811	TRUE	1	40		1.5076	0.970754	83.5793			N	N	N	N	N	N	N	N	N	N	N
36	B12	FALSE	Root	FcARF12	UNKNOWN	SYBR	None				120.269	3.58755	4031.93	25.8589	25.8912	0.155548		-9.53287	1.82504	-6.91013	TRUE	0.558734	TRUE	1	40		1.58277	0.972197	83.8422			N	N	N	N	N	N	N	N	N	N	N
37	B13	FALSE	Root	FcARF13	UNKNOWN	SYBR	None				86.3277	2.5127	2965.92	26.6014	26.1405	0.405258		-9.28358	1.83779	-6.43175	TRUE	0.344091	TRUE	1	40		1.49791	0.971609	81.0814			N	N	N	N	N	N	N	N	N	N	N
38	B14	FALSE	Root	FcARF14	UNKNOWN	SYBR	None				94.2237	2.81953	3148.8	28.1055	28.1358	0.0788102		-7.28823	1.8234	-6.55802	TRUE	0.297491	TRUE	1	40		1.52474	0.977257	82.5276			N	N	N	N	N	N	N	N	N	N	N
39	B15	FALSE	Root	FcARF15	UNKNOWN	SYBR	None				725.002	21.6604	24266.7	23.1994	23.0657	0.123365		-12.3583	1.82422	-9.50184	TRUE	0.203861	TRUE	1	40		1.54169	0.982695	88.4436	78.978		N	Y	N	N	N	N	N	N	N	N	Y
40	B16	FALSE	Root	FcARF16	UNKNOWN	SYBR	None				270.623	8.10557	9035.38	22.5351	22.5656	0.0306503		-12.8585	1.82292	-8.08014	TRUE	0.492056	TRUE	1	40		1.57373	0.974209	86.3401			N	N	N	N	N	N	N	N	N	N	N
41	B17	FALSE	Root	FcARF17	UNKNOWN	SYBR	None				18.496	0.512435	667.6	31.1468	30.5434	0.670024		-4.88064	1.86343	-4.20914	TRUE	0.477253	TRUE	1	40		1.58761	0.981421	82.5276			N	N	N	N	N	N	N	N	N	N	N
42	B18	FALSE	Root	FcARF18	UNKNOWN	SYBR	None				63.4771	1.89303	2128.52	29.5597	29.466	0.159794		-5.95809	1.82516	-5.98816	TRUE	0.46441	TRUE	1	40		1.41413	0.955835	83.8422			N	Y	N	N	N	N	N	N	N	N	N
43	B19	FALSE	Root	FcARF19	UNKNOWN	SYBR	None				113.33	3.36543	3816.35	24.8658	25.0401	0.222957		-10.384	1.82737	-6.82438	TRUE	0.529257	TRUE	1	40		1.60076	0.987825	82.1332			N	N	N	N	N	N	N	N	N	N	N
44	B20	FALSE	Root	FcARF20	UNKNOWN	SYBR	None							36.9148	35.4241	3.15724					TRUE	0.300923	TRUE	1	40		1.59282	0.983163	83.8422			N	Y	N	N	N	N	N	N	N	N	N
45	B21	FALSE	Root	Actin	UNKNOWN	SYBR	None				27.5075	0.806889	937.751	28.9533	29.3482	0.346117		-6.07583	1.83375	-4.78175	TRUE	0.402462	TRUE	1	40		1.46317	0.966507	85.5513			N	Y	N	N	N	N	N	N	N	N	N
46	B22	FALSE	Peel	FcARF2	UNKNOWN	SYBR	None				104.98	2.41122	4570.66	29.432	30.5359	1.2517		-4.8882	1.96086	-6.71398	TRUE	0.377308	TRUE	1	40		1.5654	0.98173	83.9737			N	N	N	N	N	N	N	N	N	N	N
47	B23	FALSE	Peel	FcARF2	UNKNOWN	SYBR	None				66.8913	1.89127	2365.84	25.2476	25.0963	0.575542		-10.3277	1.85287	-6.06375	TRUE	0.377308	TRUE	1	40		1.58435	0.964545	84.1052			N	N	N	N	N	N	N	N	N	N	N
48	B24	FALSE	Peel	FcARF2	UNKNOWN	SYBR	None				0.732453	0.491307	1.09196	26.7033	26.7783	0.133541		-1.2986	0.207499	0.449192	TRUE	0.377308	TRUE	1	40		1.56325	0.985044	84.1052			N	N	N	N	N	N	N	N	N	N	N
49	C1	FALSE	Root	FcARF1	UNKNOWN	SYBR	None				0.732453	0.491307	1.09196	26.9324	26.7783	0.133541		-1.2986	0.207499	0.449192	TRUE	0.2	TRUE	1	40		0	0	83.9737			N	N	N	N	N	N	Y	Y	Y	N	N
50	C2	FALSE	Root	FcARF2	UNKNOWN	SYBR	None				0.732453	0.491307	1.09196	26.6991	26.7783	0.133541		-1.2986	0.207499	0.449192	TRUE	0.377308	TRUE	1	40		1.57956	0.992874	84.1052			N	N	N	N	N	N	N	N	N	N	N
51	C3	FALSE	Root	FcARF3	UNKNOWN	SYBR	None				148.294	16.5267	3022.62	23.9088	23.0324	3.50377					TRUE	0.04	TRUE	1	40		0.696833	0.687175	81.7388			N	Y	N	N	N	N	N	Y	Y	N	N
52	C4	FALSE	Root	FcARF4	UNKNOWN	SYBR	None				104.147	3.11498	3482.11	26.8819	26.9738	0.0945953		-8.45028	1.82365	-6.70248	TRUE	0.526067	TRUE	1	40		1.59346	0.99088	82.3961			N	Y	N	N	N	N	N	N	N	N	N
53	C5	FALSE	Root	FcARF5	UNKNOWN	SYBR	None				253.491	1.0049	63944.7	30.9846	31.3614	3.84796		-4.06267	2.87373	-7.98579	TRUE	0.155571	TRUE	1	40		1.43039	0.971146	82.0017			N	Y	N	N	N	N	N	N	N	N	N
54	C6	FALSE	Root	FcARF6	UNKNOWN	SYBR	None				163.28	4.4907	5936.82	28.8239	28.2768	0.701092		-7.1473	1.86723	-7.35121	TRUE	0.267971	TRUE	1	40		1.51507	0.982644	83.8422	75.034		N	Y	N	N	N	N	N	N	N	N	Y
55	C7	FALSE	Root	FcARF7	UNKNOWN	SYBR	None				25.3674	0.710473	905.743	29.2026	29.2309	0.621305		-6.19319	1.85779	-4.6649	TRUE	0.241364	TRUE	1	40		1.50706	0.971317	82.2646			N	Y	N	N	N	N	N	N	N	N	N
56	C8	FALSE	Root	FcARF8	UNKNOWN	SYBR	None				53.7142	1.43528	2010.21	31.4918	30.8256	0.812521		-4.59845	1.88223	-5.74723	TRUE	0.283002	TRUE	1	40		1.59185	0.983108	83.9737			N	N	N	N	N	N	N	N	N	N	N
57	C9	FALSE	Root	FcARF9	UNKNOWN	SYBR	None				120.453	2.94245	4930.86	26.0224	26.4868	1.09228		-8.93725	1.92883	-6.91232	TRUE	0.34101	TRUE	1	40		1.529	0.979787	84.1052			N	Y	N	N	N	N	N	N	N	N	N
58	C10	FALSE	Root	FcARF10	UNKNOWN	SYBR	None				57.6991	1.71621	1939.85	26.8943	27.0089	0.201183		-8.41517	1.82653	-5.85048	TRUE	0.556608	TRUE	1	40		1.6065	0.978711	83.8422			N	N	N	N	N	N	N	N	N	N	N
59	C11	FALSE	Root	FcARF11	UNKNOWN	SYBR	None				168.238	4.39181	6444.76	29.64	29.9633	0.893032		-5.46082	1.89435	-7.39436	TRUE	0.386811	TRUE	1	40		1.53404	0.992884	83.5793			N	N	N	N	N	N	N	N	N	N	N
60	C12	FALSE	Root	FcARF12	UNKNOWN	SYBR	None				120.269	3.58755	4031.93	26.0604	25.8912	0.155548		-9.53287	1.82504	-6.91013	TRUE	0.558734	TRUE	1	40		1.59815	0.980718	83.8422			N	N	N	N	N	N	N	N	N	N	N
61	C13	FALSE	Root	FcARF13	UNKNOWN	SYBR	None				86.3277	2.5127	2965.92	25.9803	26.1405	0.405258		-9.28358	1.83779	-6.43175	TRUE	0.344091	TRUE	1	40		1.51636	0.979909	81.2129			N	N	N	N	N	N	N	N	N	N	N
62	C14	FALSE	Root	FcARF14	UNKNOWN	SYBR	None				94.2237	2.81953	3148.8	28.2253	28.1358	0.0788102		-7.28823	1.8234	-6.55802	TRUE	0.297491	TRUE	1	40		1.54055	0.982208	82.5276			N	N	N	N	N	N	N	N	N	N	N
63	C15	FALSE	Root	FcARF15	UNKNOWN	SYBR	None				725.002	21.6604	24266.7	22.9562	23.0657	0.123365		-12.3583	1.82422	-9.50184	TRUE	0.203861	TRUE	1	40		1.52593	0.980918	88.0492	82.3961		N	Y	N	N	N	N	N	N	N	N	Y
64	C16	FALSE	Root	FcARF16	UNKNOWN	SYBR	None				270.623	8.10557	9035.38	22.5653	22.5656	0.0306503		-12.8585	1.82292	-8.08014	TRUE	0.492056	TRUE	1	40		1.57333	0.98437	86.3401	89.8897		N	N	N	N	N	N	N	N	N	N	Y
65	C17	FALSE	Root	FcARF17	UNKNOWN	SYBR	None				18.496	0.512435	667.6	29.8224	30.5434	0.670024		-4.88064	1.86343	-4.20914	TRUE	0.477253	TRUE	1	40		1.59692	0.980843	82.5276			N	N	N	N	N	N	N	N	N	N	N
66	C18	FALSE	Root	FcARF18	UNKNOWN	SYBR	None				63.4771	1.89303	2128.52	29.5568	29.466	0.159794		-5.95809	1.82516	-5.98816	TRUE	0.46441	TRUE	1	40		1.37155	0.937663	76.743			N	Y	N	N	N	N	N	N	N	N	N
67	C19	FALSE	Root	FcARF19	UNKNOWN	SYBR	None				113.33	3.36543	3816.35	24.9632	25.0401	0.222957		-10.384	1.82737	-6.82438	TRUE	0.529257	TRUE	1	40		1.59081	0.983408	82.1332			N	N	N	N	N	N	N	N	N	N	N
68	C20	FALSE	Root	FcARF20	UNKNOWN	SYBR	None							37.5599	35.4241	3.15724					TRUE	0.300923	TRUE	1	40		1.5813	0.976985	83.9737			N	Y	N	N	N	N	N	N	N	N	N
69	C21	FALSE	Root	Actin	UNKNOWN	SYBR	None				27.5075	0.806889	937.751	29.4925	29.3482	0.346117		-6.07583	1.83375	-4.78175	TRUE	0.402462	TRUE	1	40		1.51297	0.967282	85.5513			N	Y	N	N	N	N	N	N	N	N	N
70	C22	FALSE	Peel	FcARF3	UNKNOWN	SYBR	None				104.98	2.41122	4570.66	31.8958	30.5359	1.2517		-4.8882	1.96086	-6.71398	TRUE	0.04	TRUE	1	40		0	0	61.0985			N	N	N	N	N	N	Y	Y	N	N	N
71	C23	FALSE	Peel	FcARF3	UNKNOWN	SYBR	None				66.8913	1.89127	2365.84	24.4603	25.0963	0.575542		-10.3277	1.85287	-6.06375	TRUE	0.04	TRUE	1	40		0.56478	0	60.5726			N	N	N	N	N	N	N	Y	N	N	N
72	C24	FALSE	Peel	FcARF3	UNKNOWN	SYBR	None					0.351956	2.84126	28.1482	27.1793	1.10259			1.0402	0.637113	TRUE	0.04	TRUE	1	40		0	0	61.6243			N	N	N	N	N	N	N	Y	N	N	N
73	D1	FALSE	Stem	FcARF1	UNKNOWN	SYBR	None					0.351956	2.84126	28.2357	27.1793	1.10259			1.0402	0.637113	TRUE	0.2	TRUE	1	40		0	0	91.7302			N	N	Y	N	N	N	Y	Y	Y	N	N
74	D2	FALSE	Stem	FcARF2	UNKNOWN	SYBR	None					0.351956	2.84126	28.1238	27.1793	1.10259			1.0402	0.637113	TRUE	0.377308	TRUE	1	40		1.58369	0.989191	84.1052			N	N	N	N	N	N	N	N	N	N	N
75	D3	FALSE	Stem	FcARF3	UNKNOWN	SYBR	None							25.9118	25.8866	0.976212					TRUE	0.04	TRUE	1	40		0.818159	0.658122	81.6073			N	Y	N	N	N	N	N	Y	N	N	N
76	D4	FALSE	Stem	FcARF4	UNKNOWN	SYBR	None				21.9928	1.56807	308.457	25.8344	25.8518	0.0881312		-6.20675	1.37225	-4.45896	TRUE	0.526067	TRUE	1	40		1.57503	0.980332	82.1332			N	Y	N	N	N	N	N	N	N	N	N
77	D5	FALSE	Stem	FcARF5	UNKNOWN	SYBR	None				12.4075	0.00779807	141.469	35.3963	32.3485	4.31014		0.289984	3.34202	-3.63314	TRUE	0.155571	TRUE	1	40		1.4262	0.971837	82.0017			N	N	N	N	N	N	N	N	N	N	N
78	D6	FALSE	Stem	FcARF6	UNKNOWN	SYBR	None				26.8263	1.76626	407.442	28.032	27.5169	0.594694		-4.54166	1.41363	-4.74557	TRUE	0.267971	TRUE	1	40		1.49788	0.973669	84.2366	74.771		N	N	N	N	N	N	N	N	N	N	Y
79	D7	FALSE	Stem	FcARF7	UNKNOWN	SYBR	None				6.9906	0.49845	98.0409	27.8025	27.7248	0.0869132		-4.3337	1.37222	-2.80542	TRUE	0.241364	TRUE	1	40		1.44446	0.959426	82.0017	76.4801		N	N	N	N	N	N	N	N	N	N	Y
80	D8	FALSE	Stem	FcARF8	UNKNOWN	SYBR	None				32.0294	2.27023	451.886	28.3922	28.206	0.181823		-3.85255	1.37532	-5.00133	TRUE	0.283002	TRUE	1	40		1.58717	0.982982	83.8422			N	N	N	N	N	N	N	N	N	N	N
81	D9	FALSE	Stem	FcARF9	UNKNOWN	SYBR	None				21.7733	1.54716	306.418	25.7422	25.5891	0.149352		-6.46942	1.37401	-4.44449	TRUE	0.34101	TRUE	1	40		1.50793	0.979865	83.9737			N	Y	N	N	N	N	N	N	N	N	N
82	D10	FALSE	Stem	FcARF10	UNKNOWN	SYBR	None				13.8003	0.985354	193.279	25.7361	25.7072	0.0409224		-6.35132	1.37151	-3.78663	TRUE	0.556608	TRUE	1	40		1.59155	0.987979	83.7108			N	N	N	N	N	N	N	N	N	N	N
83	D11	FALSE	Stem	FcARF11	UNKNOWN	SYBR	None				38.371	2.32401	633.531	29.681	28.7301	0.852809		-3.3284	1.45702	-5.26194	TRUE	0.386811	TRUE	1	40		1.53963	0.980254	83.4478			N	Y	N	N	N	N	N	N	N	N	N
84	D12	FALSE	Stem	FcARF12	UNKNOWN	SYBR	None				10.7711	0.730992	158.711	26.5106	26.0067	0.469978		-6.05184	1.39789	-3.42909	TRUE	0.558734	TRUE	1	40		1.60573	0.98584	83.8422			N	N	N	N	N	N	N	N	N	N	N
85	D13	FALSE	Stem	FcARF13	UNKNOWN	SYBR	None				7.34139	0.484932	111.141	26.9841	26.3307	0.582566		-5.72788	1.41195	-2.87605	TRUE	0.344091	TRUE	1	40		1.52105	0.977163	81.0814			N	N	N	N	N	N	N	N	N	N	N
86	D14	FALSE	Stem	FcARF14	UNKNOWN	SYBR	None				7.24044	0.506498	103.503	28.679	28.4723	0.299255		-3.58629	1.38214	-2.85608	TRUE	0.297491	TRUE	1	40		1.55719	0.979977	82.5276			N	N	N	N	N	N	N	N	N	N	N
87	D15	FALSE	Stem	FcARF15	UNKNOWN	SYBR	None				29.1818	2.08053	409.308	24.2818	24.3351	0.0894		-7.72348	1.37227	-4.867	TRUE	0.203861	TRUE	1	40		1.53401	0.980923	88.0492	82.5276	78.1891	N	N	N	N	N	N	N	N	N	N	Y
88	D16	FALSE	Stem	FcARF16	UNKNOWN	SYBR	None				22.023	1.56983	308.959	22.7125	22.8193	0.094036		-9.23927	1.37238	-4.46094	TRUE	0.492056	TRUE	1	40		1.5749	0.980903	86.3401			N	N	N	N	N	N	N	N	N	N	N
89	D17	FALSE	Stem	FcARF17	UNKNOWN	SYBR	None				4.3986	0.312918	61.8299	29.2487	29.25	0.131609		-2.80855	1.37341	-2.13705	TRUE	0.477253	TRUE	1	40		1.59406	0.974788	82.5276			N	N	N	N	N	N	N	N	N	N	N
90	D18	FALSE	Stem	FcARF18	UNKNOWN	SYBR	None				5.30333	0.364516	77.1581	29.9805	29.6817	0.407021		-2.37682	1.39129	-2.4069	TRUE	0.46441	TRUE	1	40		1.56522	0.977572	83.9737			N	Y	N	N	N	N	N	N	N	N	N
91	D19	FALSE	Stem	FcARF19	UNKNOWN	SYBR	None				9.67325	0.685812	136.439	25.3862	25.225	0.178764		-6.83359	1.37518	-3.274	TRUE	0.529257	TRUE	1	40		1.59249	0.981088	82.1332			N	N	N	N	N	N	N	N	N	N	N
92	D20	FALSE	Stem	FcARF20	UNKNOWN	SYBR	None							33.1704	32.0585	2.37517					TRUE	0.300923	TRUE	1	40		1.59459	0.982114	83.8422	88.7065		N	Y	N	N	N	N	N	N	N	N	Y
93	D21	FALSE	Stem	Actin	UNKNOWN	SYBR	None				5.83079	0.401713	84.633	28.6288	28.2208	0.394306		-3.83777	1.39007	-2.54369	TRUE	0.402462	TRUE	1	40		1.5413	0.966749	85.6828			N	N	N	N	N	N	N	N	N	N	N
94	D22	FALSE	Peel	FcARF4	UNKNOWN	SYBR	None				27.8289	1.59216	486.412	28.9191	29.0858	0.994343		-2.97273	1.48662	-4.79851	TRUE	0.526067	TRUE	1	40		1.55133	0.981333	82.0017	84.2366		N	N	N	N	N	N	N	N	N	N	Y
95	D23	FALSE	Peel	FcARF4	UNKNOWN	SYBR	None				27.5374	1.96197	386.504	22.9327	23.0112	0.104314		-9.04731	1.37262	-4.78332	TRUE	0.526067	TRUE	1	40		1.58543	0.985614	82.1332	84.4996		N	N	N	N	N	N	N	N	N	N	Y
96	D24	FALSE	Peel	FcARF4	UNKNOWN	SYBR	None				1.30173	0.847889	1.9985	27.7401	27.9003	0.193736		-0.176521	0.222762	-0.380433	TRUE	0.526067	TRUE	1	40		1.59012	0.979603	84.3681	82.1332		N	N	N	N	N	N	N	N	N	N	Y
97	E1	FALSE	Stem	FcARF1	UNKNOWN	SYBR	None				1.30173	0.847889	1.9985	27.8452	27.9003	0.193736		-0.176521	0.222762	-0.380433	TRUE	0.2	TRUE	1	40		1.08772	0.0687192	93.4393			N	N	N	N	N	N	N	Y	Y	N	N
98	E2	FALSE	Stem	FcARF2	UNKNOWN	SYBR	None				1.30173	0.847889	1.9985	28.1157	27.9003	0.193736		-0.176521	0.222762	-0.380433	TRUE	0.377308	TRUE	1	40		1.58445	0.980026	84.1052			N	N	N	N	N	N	N	N	N	N	N
99	E3	FALSE	Stem	FcARF3	UNKNOWN	SYBR	None							25.2341	25.8866	0.976212		3.82806		2.3842	TRUE	0.04	TRUE	1	40		0.608684	0	93.9652	90.4156	69.1179	N	N	N	N	N	N	N	Y	Y	N	Y
100	E4	FALSE	Stem	FcARF4	UNKNOWN	SYBR	None				21.9928	1.56807	308.457	25.7737	25.8518	0.0881312		-6.20675	1.37225	-4.45896	TRUE	0.526067	TRUE	1	40		1.6027	0.988203	82.3961			N	Y	N	N	N	N	N	N	N	N	N
101	E5	FALSE	Stem	FcARF5	UNKNOWN	SYBR	None							25.2341	32.3485	4.31014					TRUE	0.155571	TRUE	1	40		1.44563	0.972404	82.1332			N	N	N	N	N	N	N	N	N	N	N
102	E6	FALSE	Stem	FcARF6	UNKNOWN	SYBR	None				26.8263	1.76626	407.442	26.8661	27.5169	0.594694		-4.54166	1.41363	-4.74557	TRUE	0.267971	TRUE	1	40		1.52986	0.982249	84.3681	74.9025		N	N	N	N	N	N	N	N	N	N	Y
103	E7	FALSE	Stem	FcARF7	UNKNOWN	SYBR	None				6.9906	0.49845	98.0409	27.6309	27.7248	0.0869132		-4.3337	1.37222	-2.80542	TRUE	0.241364	TRUE	1	40		1.4909	0.969248	82.2646			N	N	N	N	N	N	N	N	N	N	N
104	E8	FALSE	Stem	FcARF8	UNKNOWN	SYBR	None				32.0294	2.27023	451.886	28.0289	28.206	0.181823		-3.85255	1.37532	-5.00133	TRUE	0.283002	TRUE	1	40		1.60449	0.978311	83.9737			N	N	N	N	N	N	N	N	N	N	N
105	E9	FALSE	Stem	FcARF9	UNKNOWN	SYBR	None				21.7733	1.54716	306.418	25.4438	25.5891	0.149352		-6.46942	1.37401	-4.44449	TRUE	0.34101	TRUE	1	40		1.5059	0.974934	83.9737			N	Y	N	N	N	N	N	N	N	N	N
106	E10	FALSE	Stem	FcARF10	UNKNOWN	SYBR	None				13.8003	0.985354	193.279	25.6604	25.7072	0.0409224		-6.35132	1.37151	-3.78663	TRUE	0.556608	TRUE	1	40		1.61885	0.984767	83.8422			N	N	N	N	N	N	N	N	N	N	N
107	E11	FALSE	Stem	FcARF11	UNKNOWN	SYBR	None				38.371	2.32401	633.531	28.4764	28.7301	0.852809		-3.3284	1.45702	-5.26194	TRUE	0.386811	TRUE	1	40		1.54685	0.980059	83.5793			N	Y	N	N	N	N	N	N	N	N	N
108	E12	FALSE	Stem	FcARF12	UNKNOWN	SYBR	None				10.7711	0.730992	158.711	25.5803	26.0067	0.469978		-6.05184	1.39789	-3.42909	TRUE	0.558734	TRUE	1	40		1.60998	0.985639	83.8422			N	N	N	N	N	N	N	N	N	N	N
109	E13	FALSE	Stem	FcARF13	UNKNOWN	SYBR	None				7.34139	0.484932	111.141	25.8656	26.3307	0.582566		-5.72788	1.41195	-2.87605	TRUE	0.344091	TRUE	1	40		1.49506	0.969719	80.95			N	N	N	N	N	N	N	N	N	N	N
110	E14	FALSE	Stem	FcARF14	UNKNOWN	SYBR	None				7.24044	0.506498	103.503	28.1291	28.4723	0.299255		-3.58629	1.38214	-2.85608	TRUE	0.297491	TRUE	1	40		1.52083	0.979794	82.3961			N	N	N	N	N	N	N	N	N	N	N
111	E15	FALSE	Stem	FcARF15	UNKNOWN	SYBR	None				29.1818	2.08053	409.308	24.2851	24.3351	0.0894		-7.72348	1.37227	-4.867	TRUE	0.203861	TRUE	1	40		1.52045	0.983064	88.0492	82.3961	78.5836	N	N	N	N	N	N	N	N	N	N	Y
112	E16	FALSE	Stem	FcARF16	UNKNOWN	SYBR	None				22.023	1.56983	308.959	22.8554	22.8193	0.094036		-9.23927	1.37238	-4.46094	TRUE	0.492056	TRUE	1	40		1.5757	0.975341	86.3401			N	N	N	N	N	N	N	N	N	N	N
113	E17	FALSE	Stem	FcARF17	UNKNOWN	SYBR	None				4.3986	0.312918	61.8299	29.119	29.25	0.131609		-2.80855	1.37341	-2.13705	TRUE	0.477253	TRUE	1	40		1.59648	0.97367	82.5276			N	N	N	N	N	N	N	N	N	N	N
114	E18	FALSE	Stem	FcARF18	UNKNOWN	SYBR	None				5.30333	0.364516	77.1581	29.2181	29.6817	0.407021		-2.37682	1.39129	-2.4069	TRUE	0.46441	TRUE	1	40		1.62328	0.985633	83.0534			N	Y	N	N	N	N	N	N	N	N	N
115	E19	FALSE	Stem	FcARF19	UNKNOWN	SYBR	None				9.67325	0.685812	136.439	25.0327	25.225	0.178764		-6.83359	1.37518	-3.274	TRUE	0.529257	TRUE	1	40		1.59623	0.97771	82.2646			N	N	N	N	N	N	N	N	N	N	N
116	E20	FALSE	Stem	FcARF20	UNKNOWN	SYBR	None							29.3314	32.0585	2.37517					TRUE	0.300923	TRUE	1	40		1.60626	0.972375	84.1052			N	Y	N	N	N	N	N	N	N	N	N
117	E21	FALSE	Stem	Actin	UNKNOWN	SYBR	None				5.83079	0.401713	84.633	27.8418	28.2208	0.394306		-3.83777	1.39007	-2.54369	TRUE	0.402462	TRUE	1	40		1.52391	0.955324	85.8142			N	N	N	N	N	N	N	N	N	N	N
118	E22	FALSE	Peel	FcARF5	UNKNOWN	SYBR	None				27.8289	1.59216	486.412	28.1854	29.0858	0.994343		-2.97273	1.48662	-4.79851	TRUE	0.155571	TRUE	1	40		1.45343	0.980586	82.2646			N	N	N	N	N	N	N	N	N	N	N
119	E23	FALSE	Peel	FcARF5	UNKNOWN	SYBR	None				27.5374	1.96197	386.504	23.1296	23.0112	0.104314		-9.04731	1.37262	-4.78332	TRUE	0.155571	TRUE	1	40		1.43375	0.959277	82.1332			N	N	N	N	N	N	N	N	N	N	N
120	E24	FALSE	Peel	FcARF5	UNKNOWN	SYBR	None				0.522989	0.357803	0.764437	27.4346	27.4837	0.0732957		-0.59314	0.197237	0.935147	TRUE	0.155571	TRUE	1	40		1.43536	0.957835	82.2646			N	N	N	N	N	N	N	N	N	N	N
121	F1	FALSE	Stem	FcARF1	UNKNOWN	SYBR	None				0.522989	0.357803	0.764437	27.568	27.4837	0.0732957		-0.59314	0.197237	0.935147	TRUE	0.2	TRUE	1	40		1.26743	0	89.8897			N	N	N	N	N	N	N	Y	Y	N	N
122	F2	FALSE	Stem	FcARF2	UNKNOWN	SYBR	None				0.522989	0.357803	0.764437	27.4486	27.4837	0.0732957		-0.59314	0.197237	0.935147	TRUE	0.377308	TRUE	1	40		1.58421	0.983305	84.1052			N	N	N	N	N	N	N	N	N	N	N
123	F3	FALSE	Stem	FcARF3	UNKNOWN	SYBR	None							25.9715	25.8866	0.976212					TRUE	0.04	TRUE	1	40		0.881675	0.761418	81.7388			N	Y	N	N	N	N	N	Y	N	N	N
124	F4	FALSE	Stem	FcARF4	UNKNOWN	SYBR	None				21.9928	1.56807	308.457	25.9473	25.8518	0.0881312		-6.20675	1.37225	-4.45896	TRUE	0.526067	TRUE	1	40		1.57731	0.973888	82.1332			N	Y	N	N	N	N	N	N	N	N	N
125	F5	FALSE	Stem	FcARF5	UNKNOWN	SYBR	None				12.4075	0.00779807	19741.5	29.3008	32.3485	4.31014		0.289984	3.34202	-3.63314	TRUE	0.155571	TRUE	1	40		1.44565	0.970958	82.1332			N	N	N	N	N	N	N	N	N	N	N
126	F6	FALSE	Stem	FcARF6	UNKNOWN	SYBR	None				26.8263	1.76626	407.442	27.6525	27.5169	0.594694		-4.54166	1.41363	-4.74557	TRUE	0.267971	TRUE	1	40		1.53999	0.980876	84.3681			N	N	N	N	N	N	N	N	N	N	N
127	F7	FALSE	Stem	FcARF7	UNKNOWN	SYBR	None				6.9906	0.49845	98.0409	27.7411	27.7248	0.0869132		-4.3337	1.37222	-2.80542	TRUE	0.241364	TRUE	1	40		1.49253	0.970605	82.2646			N	N	N	N	N	N	N	N	N	N	N
128	F8	FALSE	Stem	FcARF8	UNKNOWN	SYBR	None				32.0294	2.27023	451.886	28.1969	28.206	0.181823		-3.85255	1.37532	-5.00133	TRUE	0.283002	TRUE	1	40		1.5961	0.986924	83.9737			N	N	N	N	N	N	N	N	N	N	N
129	F9	FALSE	Stem	FcARF9	UNKNOWN	SYBR	None				21.7733	1.54716	306.418	25.5814	25.5891	0.149352		-6.46942	1.37401	-4.44449	TRUE	0.34101	TRUE	1	40		1.50121	0.977659	84.1052			N	Y	N	N	N	N	N	N	N	N	N
130	F10	FALSE	Stem	FcARF10	UNKNOWN	SYBR	None				13.8003	0.985354	193.279	25.7251	25.7072	0.0409224		-6.35132	1.37151	-3.78663	TRUE	0.556608	TRUE	1	40		1.60285	0.982437	83.7108			N	N	N	N	N	N	N	N	N	N	N
131	F11	FALSE	Stem	FcARF11	UNKNOWN	SYBR	None				38.371	2.32401	633.531	28.033	28.7301	0.852809		-3.3284	1.45702	-5.26194	TRUE	0.386811	TRUE	1	40		1.55193	0.971372	83.4478			N	Y	N	N	N	N	N	N	N	N	N
132	F12	FALSE	Stem	FcARF12	UNKNOWN	SYBR	None				10.7711	0.730992	158.711	25.9292	26.0067	0.469978		-6.05184	1.39789	-3.42909	TRUE	0.558734	TRUE	1	40		1.59505	0.981303	83.8422			N	N	N	N	N	N	N	N	N	N	N
133	F13	FALSE	Stem	FcARF13	UNKNOWN	SYBR	None				7.34139	0.484932	111.141	26.1422	26.3307	0.582566		-5.72788	1.41195	-2.87605	TRUE	0.344091	TRUE	1	40		1.50982	0.972512	81.0814			N	N	N	N	N	N	N	N	N	N	N
134	F14	FALSE	Stem	FcARF14	UNKNOWN	SYBR	None				7.24044	0.506498	103.503	28.6087	28.4723	0.299255		-3.58629	1.38214	-2.85608	TRUE	0.297491	TRUE	1	40		1.54524	0.974715	82.3961			N	N	N	N	N	N	N	N	N	N	N
135	F15	FALSE	Stem	FcARF15	UNKNOWN	SYBR	None				29.1818	2.08053	409.308	24.4383	24.3351	0.0894		-7.72348	1.37227	-4.867	TRUE	0.203861	TRUE	1	40		1.5531	0.976955	88.1806	77.2689		N	N	N	N	N	N	N	N	N	N	Y
136	F16	FALSE	Stem	FcARF16	UNKNOWN	SYBR	None				22.023	1.56983	308.959	22.8899	22.8193	0.094036		-9.23927	1.37238	-4.46094	TRUE	0.492056	TRUE	1	40		1.59094	0.975862	86.3401			N	N	N	N	N	N	N	N	N	N	N
137	F17	FALSE	Stem	FcARF17	UNKNOWN	SYBR	None				4.3986	0.312918	61.8299	29.3822	29.25	0.131609		-2.80855	1.37341	-2.13705	TRUE	0.477253	TRUE	1	40		1.59919	0.974549	82.5276			N	N	N	N	N	N	N	N	N	N	N
138	F18	FALSE	Stem	FcARF18	UNKNOWN	SYBR	None				5.30333	0.364516	77.1581	29.8465	29.6817	0.407021		-2.37682	1.39129	-2.4069	TRUE	0.46441	TRUE	1	40		1.58606	0.971222	83.7108			N	Y	N	N	N	N	N	N	N	N	N
139	F19	FALSE	Stem	FcARF19	UNKNOWN	SYBR	None				9.67325	0.685812	136.439	25.256	25.225	0.178764		-6.83359	1.37518	-3.274	TRUE	0.529257	TRUE	1	40		1.6064	0.973535	82.2646			N	N	N	N	N	N	N	N	N	N	N
140	F20	FALSE	Stem	FcARF20	UNKNOWN	SYBR	None							33.6739	32.0585	2.37517					TRUE	0.300923	TRUE	1	40		1.55831	0.97544	83.7108	86.9974		N	Y	N	N	N	N	N	N	N	N	Y
141	F21	FALSE	Stem	Actin	UNKNOWN	SYBR	None				5.83079	0.401713	84.633	28.1917	28.2208	0.394306		-3.83777	1.39007	-2.54369	TRUE	0.402462	TRUE	1	40		1.54118	0.964777	85.8142			N	N	N	N	N	N	N	N	N	N	N
142	F22	FALSE	Peel	FcARF6	UNKNOWN	SYBR	None				27.8289	1.59216	486.412	30.153	29.0858	0.994343		-2.97273	1.48662	-4.79851	TRUE	0.267971	TRUE	1	40		1.49733	0.967745	84.4996	74.9025		N	N	N	N	N	N	N	N	N	N	Y
143	F23	FALSE	Peel	FcARF6	UNKNOWN	SYBR	None				27.5374	1.96197	386.504	22.9714	23.0112	0.104314		-9.04731	1.37262	-4.78332	TRUE	0.267971	TRUE	1	40		1.43157	0.974537	84.2366	75.5598		N	N	N	N	N	N	N	N	N	N	Y
144	F24	FALSE	Peel	FcARF6	UNKNOWN	SYBR	None				1.85922	1.11277	3.10641	28.2399	28.3309	0.319517		0.254081	0.266724	-0.8947	TRUE	0.267971	TRUE	1	40		1.52222	0.948309	84.4996	75.2969		N	N	N	N	N	N	N	N	N	N	Y
145	G1	FALSE	Old leaves	FcARF1	UNKNOWN	SYBR	None				1.85922	1.11277	3.10641	28.6861	28.3309	0.319517		0.254081	0.266724	-0.8947	TRUE	0.2	TRUE	1	40		0	0	62.6761			N	N	N	N	N	N	Y	Y	Y	N	N
146	G2	FALSE	Old leaves	FcARF2	UNKNOWN	SYBR	None				1.85922	1.11277	3.10641	28.0668	28.3309	0.319517		0.254081	0.266724	-0.8947	TRUE	0.377308	TRUE	1	40		1.5912	0.982155	84.2366			N	Y	N	N	N	N	N	N	N	N	N
147	G3	FALSE	Old leaves	FcARF3	UNKNOWN	SYBR	None							30.6713	30.7414	0.597154					TRUE	0.04	TRUE	1	40		0.94706	0.61822	82.3961			N	Y	N	N	N	N	N	Y	N	N	N
148	G4	FALSE	Old leaves	FcARF4	UNKNOWN	SYBR	None				0.233224	0.0481179	1.13042	32.3764	31.8425	1.2267		0.352422	0.820138	2.10021	TRUE	0.526067	TRUE	1	40		1.60397	0.975493	82.5276			N	Y	N	N	N	N	N	N	N	N	N
149	G5	FALSE	Old leaves	FcARF5	UNKNOWN	SYBR	None				1.61904	0.233837	11.2099	33.9445	34.718	1.09399		3.22798	0.877175	-0.695138	TRUE	0.155571	TRUE	1	40		1.42606	0.963474	82.0017	76.8745		N	N	N	N	N	N	N	N	N	N	Y
150	G6	FALSE	Old leaves	FcARF6	UNKNOWN	SYBR	None				1.21397	0.265832	5.54382	32.237	31.4142	1.16421		-0.0758196	0.789192	-0.279732	TRUE	0.267971	TRUE	1	40		1.54798	0.980826	75.6913			N	Y	N	N	N	N	N	N	N	N	N
151	G7	FALSE	Old leaves	FcARF7	UNKNOWN	SYBR	None				0.240415	0.106971	0.540327	32.1613	32.0182	0.134579		0.528117	0.420793	2.0564	TRUE	0.241364	TRUE	1	40		1.48643	0.98258	77.5318			N	N	N	N	N	N	N	N	N	N	N
152	G8	FALSE	Old leaves	FcARF8	UNKNOWN	SYBR	None				0.626805	0.168317	2.33419	32.502	33.3127	0.941885		1.82269	0.683188	0.673911	TRUE	0.283002	TRUE	1	40		1.57585	0.991317	84.1052			N	Y	N	N	N	N	N	N	N	N	N
153	G9	FALSE	Old leaves	FcARF9	UNKNOWN	SYBR	None				0.709316	0.288993	1.74097	30.0043	29.9606	0.374115		-1.52943	0.466566	0.495501	TRUE	0.34101	TRUE	1	40		1.52747	0.982254	83.9737			N	Y	N	N	N	N	N	N	N	N	N
154	G10	FALSE	Old leaves	FcARF10	UNKNOWN	SYBR	None				0.134775	0.0476031	0.381578	32.3825	31.8167	0.603503		0.326677	0.540772	2.89137	TRUE	0.556608	TRUE	1	40		1.60628	0.990228	83.8422			N	Y	N	N	N	N	N	N	N	N	N
155	G11	FALSE	Old leaves	FcARF11	UNKNOWN	SYBR	None				7.63297	1.53918	37.8528	29.8948	30.4914	0.843654		-0.998699	0.725883	-2.93224	TRUE	0.386811	TRUE	1	40		1.53906	0.978798	83.5793			N	N	N	N	N	N	N	N	N	N	N
156	G12	FALSE	Old leaves	FcARF12	UNKNOWN	SYBR	None				0.247547	0.0408854	1.49881	30.9651	30.8815	1.45388		-0.608521	0.935745	2.01423	TRUE	0.558734	TRUE	1	40		1.59411	0.979579	83.8422			N	Y	N	N	N	N	N	N	N	N	N
157	G13	FALSE	Old leaves	FcARF13	UNKNOWN	SYBR	None				0.220687	0.0874473	0.556937	31.0249	30.8182	0.425488		-0.6719	0.481016	2.17993	TRUE	0.344091	TRUE	1	40		1.50024	0.980885	81.0814			N	N	N	N	N	N	N	N	N	N	N
158	G14	FALSE	Old leaves	FcARF14	UNKNOWN	SYBR	None				0.517165	0.0999253	2.67659	31.9933	30.9088	0.876768		0.22109	0.745245	0.951304	TRUE	0.297491	TRUE	1	40		1.5365	0.98479	82.5276			N	Y	N	N	N	N	N	N	N	N	N
159	G15	FALSE	Old leaves	FcARF15	UNKNOWN	SYBR	None				0.325617	0.145852	0.726942	30.1737	30.2523	0.0968538		-1.23773	0.41732	1.61875	TRUE	0.203861	TRUE	1	40		1.49212	0.951946	87.7862	78.4521	82.7905	N	Y	N	N	N	N	N	N	N	N	Y
160	G16	FALSE	Old leaves	FcARF16	UNKNOWN	SYBR	None				0.119052	0.0286881	0.494054	30.9009	29.7821	1.06175		-1.708	0.739461	3.07033	TRUE	0.492056	TRUE	1	40		1.59224	0.981985	86.4716			N	Y	N	N	N	N	N	N	N	N	N
161	G17	FALSE	Old leaves	FcARF17	UNKNOWN	SYBR	None				0.345248	0.047893	2.4888	31.9486	32.3528	1.62709		0.862794	1.0264	1.5343	TRUE	0.477253	TRUE	1	40		1.59183	0.975024	82.5276			N	Y	N	N	N	N	N	N	N	N	N
162	G18	FALSE	Old leaves	FcARF18	UNKNOWN	SYBR	None				0.625709	0.1144	3.4223	31.8764	32.1966	1.35115		0.706511	0.882929	0.676435	TRUE	0.46441	TRUE	1	40		1.57493	0.98719	83.0534			N	Y	N	N	N	N	N	N	N	N	N
163	G19	FALSE	Old leaves	FcARF19	UNKNOWN	SYBR	None				0.142065	0.0416721	0.484317	31.481	30.7458	0.839836		-0.744216	0.637289	2.81538	TRUE	0.529257	TRUE	1	40		1.555	0.985525	82.1332			N	Y	N	N	N	N	N	N	N	N	N
164	G20	FALSE	Old leaves	FcARF20	UNKNOWN	SYBR	None							31.8447	31.49	0.716302					TRUE	0.300923	TRUE	1	40		1.61712	0.990052	84.1052			N	N	N	N	N	N	N	N	N	N	N
165	G21	FALSE	Old leaves	Actin	UNKNOWN	SYBR	None				0.422912	0.106424	1.68058	31.7383	31.4375	1.01435		-0.0525068	0.716936	1.24157	TRUE	0.402462	TRUE	1	40		1.53369	0.968915	85.8142			N	N	N	N	N	N	N	N	N	N	N
166	G22	FALSE	Peel	FcARF7	UNKNOWN	SYBR	None				4.15523	1.69182	10.2056	30.8312	31.2609	0.375411		-0.229148	0.466912	-2.05493	TRUE	0.241364	TRUE	1	40		1.47463	0.975458	82.3961			N	N	N	N	N	N	N	N	N	N	N
167	G23	FALSE	Peel	FcARF7	UNKNOWN	SYBR	None				7.92204	3.48589	18.0036	24.4492	24.2402	0.181089		-7.24986	0.426568	-2.98587	TRUE	0.241364	TRUE	1	40		1.47426	0.966718	82.3961			N	N	N	N	N	N	N	N	N	N	N
168	G24	FALSE	Peel	FcARF7	UNKNOWN	SYBR	None				0.982366	0.670549	1.43918	25.9904	26.0776	0.0823608		-1.99926	0.198425	0.0256678	TRUE	0.241364	TRUE	1	40		1.48854	0.969747	82.3961			N	N	N	N	N	N	N	N	N	N	N
169	H1	FALSE	Old leaves	FcARF1	UNKNOWN	SYBR	None				0.982366	0.670549	1.43918	26.0884	26.0776	0.0823608		-1.99926	0.198425	0.0256678	TRUE	0.2	TRUE	1	40		0.811046	0	70.6955			N	N	N	N	N	N	N	Y	Y	N	N
170	H2	FALSE	Old leaves	FcARF2	UNKNOWN	SYBR	None				0.982366	0.670549	1.43918	26.154	26.0776	0.0823608		-1.99926	0.198425	0.0256678	TRUE	0.377308	TRUE	1	40		1.59097	0.984101	84.1052			N	Y	N	N	N	N	N	N	N	N	N
171	H3	FALSE	Old leaves	FcARF3	UNKNOWN	SYBR	None							30.7218	30.7414	0.597154					TRUE	0.04	TRUE	1	40		0	0	90.2841	84.3681	73.3249	N	N	N	N	N	N	Y	Y	N	N	Y
172	H4	FALSE	Old leaves	FcARF4	UNKNOWN	SYBR	None				0.233224	0.0481179	1.13042	30.4393	31.8425	1.2267		0.352422	0.820138	2.10021	TRUE	0.526067	TRUE	1	40		1.60125	0.980989	84.3681	82.2646		N	Y	N	N	N	N	N	N	N	N	Y
173	H5	FALSE	Old leaves	FcARF5	UNKNOWN	SYBR	None							27.2185	28.8356	1.09399					TRUE	0.155571	TRUE	1	40		1.3923	0.962461	82.2646	75.1654		N	N	N	N	N	N	N	N	N	N	Y
174	H6	FALSE	Old leaves	FcARF6	UNKNOWN	SYBR	None				1.21397	0.265832	5.54382	30.0821	31.4142	1.16421		-0.0758196	0.789192	-0.279732	TRUE	0.267971	TRUE	1	40		1.54918	0.960174	75.9542			N	Y	N	N	N	N	N	N	N	N	N
175	H7	FALSE	Old leaves	FcARF7	UNKNOWN	SYBR	None				0.240415	0.106971	0.540327	31.9989	32.0182	0.134579		0.528117	0.420793	2.0564	TRUE	0.241364	TRUE	1	40		1.47547	0.969395	82.3961	76.6115		N	N	N	N	N	N	N	N	N	N	Y
176	H8	FALSE	Old leaves	FcARF8	UNKNOWN	SYBR	None				0.626805	0.168317	2.33419	34.346	33.3127	0.941885		1.82269	0.683188	0.673911	TRUE	0.283002	TRUE	1	40		1.59436	0.993119	84.1052			N	Y	N	N	N	N	N	N	N	N	N
177	H9	FALSE	Old leaves	FcARF9	UNKNOWN	SYBR	None				0.709316	0.288993	1.74097	30.311	29.9606	0.374115		-1.52943	0.466566	0.495501	TRUE	0.34101	TRUE	1	40		1.52824	0.975331	84.1052			N	Y	N	N	N	N	N	N	N	N	N
178	H10	FALSE	Old leaves	FcARF10	UNKNOWN	SYBR	None				0.134775	0.0476031	0.381578	31.1815	31.8167	0.603503		0.326677	0.540772	2.89137	TRUE	0.556608	TRUE	1	40		1.60167	0.982785	83.9737			N	Y	N	N	N	N	N	N	N	N	N
179	H11	FALSE	Old leaves	FcARF11	UNKNOWN	SYBR	None				7.63297	1.53918	37.8528	31.0879	30.4914	0.843654		-0.998699	0.725883	-2.93224	TRUE	0.386811	TRUE	1	40		1.53365	0.98128	83.5793			N	N	N	N	N	N	N	N	N	N	N
180	H12	FALSE	Old leaves	FcARF12	UNKNOWN	SYBR	None				0.247547	0.0408854	1.49881	32.2918	30.8815	1.45388		-0.608521	0.935745	2.01423	TRUE	0.558734	TRUE	1	40		0	0	61.3614			N	N	N	N	N	N	N	N	N	N	N
181	H13	FALSE	Old leaves	FcARF13	UNKNOWN	SYBR	None				0.220687	0.0874473	0.556937	30.3288	30.8182	0.425488		-0.6719	0.481016	2.17993	TRUE	0.344091	TRUE	1	40		1.5068	0.982742	81.2129			N	N	N	N	N	N	N	N	N	N	N
182	H14	FALSE	Old leaves	FcARF14	UNKNOWN	SYBR	None							31.0152	30.9088	0.876768					TRUE	0.297491	TRUE	1	40		1.52194	0.979354	82.5276			N	Y	N	N	N	N	N	N	N	N	N
183	H15	FALSE	Old leaves	FcARF15	UNKNOWN	SYBR	None				0.325617	0.145852	0.726942	30.2227	30.2523	0.0968538		-1.23773	0.41732	1.61875	TRUE	0.203861	TRUE	1	40		1.50163	0.969312	79.3723			N	Y	N	N	N	N	N	N	N	N	N
184	H16	FALSE	Old leaves	FcARF16	UNKNOWN	SYBR	None				0.119052	0.0286881	0.494054	28.7886	29.7821	1.06175		-1.708	0.739461	3.07033	TRUE	0.492056	TRUE	1	40		1.59658	0.982926	86.4716			N	Y	N	N	N	N	N	N	N	N	N
185	H17	FALSE	Old leaves	FcARF17	UNKNOWN	SYBR	None				0.345248	0.047893	2.4888	34.1439	32.3528	1.62709		0.862794	1.0264	1.5343	TRUE	0.477253	TRUE	1	40		1.61415	0.984376	82.659			N	Y	N	N	N	N	N	N	N	N	N
186	H18	FALSE	Old leaves	FcARF18	UNKNOWN	SYBR	None				0.625709	0.1144	3.4223	31.0343	32.1966	1.35115		0.706511	0.882929	0.676435	TRUE	0.46441	TRUE	1	40		1.57825	0.967841	83.1849			N	Y	N	N	N	N	N	N	N	N	N
187	H19	FALSE	Old leaves	FcARF19	UNKNOWN	SYBR	None				0.142065	0.0416721	0.484317	29.8306	30.7458	0.839836		-0.744216	0.637289	2.81538	TRUE	0.529257	TRUE	1	40		1.59658	0.97933	82.2646			N	Y	N	N	N	N	N	N	N	N	N
188	H20	FALSE	Old leaves	FcARF20	UNKNOWN	SYBR	None							30.6656	31.49	0.716302					TRUE	0.300923	TRUE	1	40		1.5934	0.982611	84.1052			N	N	N	N	N	N	N	N	N	N	N
189	H21	FALSE	Old leaves	Actin	UNKNOWN	SYBR	None				0.422912	0.106424	1.68058	30.3068	31.4375	1.01435		-0.0525068	0.716936	1.24157	TRUE	0.402462	TRUE	1	40		1.53198	0.970073	85.8142			N	N	N	N	N	N	N	N	N	N	N
190	H22	FALSE	Peel	FcARF8	UNKNOWN	SYBR	None				4.15523	1.69182	10.2056	31.4262	31.2609	0.375411		-0.229148	0.466912	-2.05493	TRUE	0.283002	TRUE	1	40		1.57084	0.992134	84.1052			N	N	N	N	N	N	N	N	N	N	N
191	H23	FALSE	Peel	FcARF8	UNKNOWN	SYBR	None				7.92204	3.48589	18.0036	24.1395	24.2402	0.181089		-7.24986	0.426568	-2.98587	TRUE	0.283002	TRUE	1	40		1.5771	0.981117	84.1052			N	N	N	N	N	N	N	N	N	N	N
192	H24	FALSE	Peel	FcARF8	UNKNOWN	SYBR	None				0.809848	0.550474	1.19144	25.7074	25.8164	0.0969355		-2.26042	0.200608	0.304276	TRUE	0.283002	TRUE	1	40		1.58212	0.978415	83.9737			N	N	N	N	N	N	N	N	N	N	N
193	I1	FALSE	Old leaves	FcARF1	UNKNOWN	SYBR	None				0.809848	0.550474	1.19144	25.8929	25.8164	0.0969355		-2.26042	0.200608	0.304276	TRUE	0.2	TRUE	1	40		0	0.351967	61.0985			N	N	N	N	N	N	N	Y	Y	N	N
194	I2	FALSE	Old leaves	FcARF2	UNKNOWN	SYBR	None				0.809848	0.550474	1.19144	25.8491	25.8164	0.0969355		-2.26042	0.200608	0.304276	TRUE	0.377308	TRUE	1	40		1.58873	0.989455	84.2366			N	Y	N	N	N	N	N	N	N	N	N
195	I3	FALSE	Old leaves	FcARF3	UNKNOWN	SYBR	None							30.8311	30.7414	0.597154		4.34109		2.89723	TRUE	0.04	TRUE	1	40		0.738091	0.37513	82.0017			N	Y	N	N	N	N	N	Y	N	N	N
196	I4	FALSE	Old leaves	FcARF4	UNKNOWN	SYBR	None				0.233224	0.0481179	1.13042	32.7117	31.8425	1.2267		0.352422	0.820138	2.10021	TRUE	0.526067	TRUE	1	40		1.59479	0.977693	84.4996			N	Y	N	N	N	N	N	N	N	N	N
197	I5	FALSE	Old leaves	FcARF5	UNKNOWN	SYBR	None				1.61904	0.233837	11.2099	29.4208	28.8356	1.09399		3.22798	0.877175	-0.695138	TRUE	0.155571	TRUE	1	40		1.39482	0.953234	82.2646	77.2689		N	N	N	N	N	N	N	N	N	N	Y
198	I6	FALSE	Old leaves	FcARF6	UNKNOWN	SYBR	None				1.21397	0.265832	5.54382	31.9236	31.4142	1.16421		-0.0758196	0.789192	-0.279732	TRUE	0.267971	TRUE	1	40		1.55821	0.971876	75.6913			N	Y	N	N	N	N	N	N	N	N	N
199	I7	FALSE	Old leaves	FcARF7	UNKNOWN	SYBR	None				0.240415	0.106971	0.540327	31.8942	32.0182	0.134579		0.528117	0.420793	2.0564	TRUE	0.241364	TRUE	1	40		1.48203	0.972714	77.1374	82.3961		N	N	N	N	N	N	N	N	N	N	Y
200	I8	FALSE	Old leaves	FcARF8	UNKNOWN	SYBR	None				0.626805	0.168317	2.33419	33.0903	33.3127	0.941885		1.82269	0.683188	0.673911	TRUE	0.283002	TRUE	1	40		1.58455	0.99122	84.1052			N	Y	N	N	N	N	N	N	N	N	N
201	I9	FALSE	Old leaves	FcARF9	UNKNOWN	SYBR	None				0.709316	0.288993	1.74097	29.5666	29.9606	0.374115		-1.52943	0.466566	0.495501	TRUE	0.34101	TRUE	1	40		0	0	84.2366	93.7022	61.2299	N	N	N	N	N	N	Y	N	N	N	Y
202	I10	FALSE	Old leaves	FcARF10	UNKNOWN	SYBR	None				0.134775	0.0476031	0.381578	31.8861	31.8167	0.603503		0.326677	0.540772	2.89137	TRUE	0.556608	TRUE	1	40		1.59084	0.974736	83.8422			N	Y	N	N	N	N	N	N	N	N	N
203	I11	FALSE	Old leaves	FcARF11	UNKNOWN	SYBR	None							30.2487	30.4914	0.843654					TRUE	0.386811	TRUE	1	40		1.53612	0.977365	83.7108			N	N	N	N	N	N	N	N	N	N	N
204	I12	FALSE	Old leaves	FcARF12	UNKNOWN	SYBR	None				0.247547	0.0408854	1.49881	29.3877	30.8815	1.45388		-0.608521	0.935745	2.01423	TRUE	0.558734	TRUE	1	40		1.59739	0.975644	83.8422			N	Y	N	N	N	N	N	N	N	N	N
205	I13	FALSE	Old leaves	FcARF13	UNKNOWN	SYBR	None				0.220687	0.0874473	0.556937	31.1008	30.8182	0.425488		-0.6719	0.481016	2.17993	TRUE	0.344091	TRUE	1	40		1.50442	0.979399	81.0814			N	N	N	N	N	N	N	N	N	N	N
206	I14	FALSE	Old leaves	FcARF14	UNKNOWN	SYBR	None				0.517165	0.0999253	2.67659	29.7178	30.9088	0.876768		0.22109	0.745245	0.951304	TRUE	0.297491	TRUE	1	40		1.53599	0.979599	82.5276			N	Y	N	N	N	N	N	N	N	N	N
207	I15	FALSE	Old leaves	FcARF15	UNKNOWN	SYBR	None				0.325617	0.145852	0.726942	30.3605	30.2523	0.0968538		-1.23773	0.41732	1.61875	TRUE	0.203861	TRUE	1	40		1.53014	0.979576	88.1806	82.5276	78.0577	N	Y	N	N	N	N	N	N	N	N	Y
208	I16	FALSE	Old leaves	FcARF16	UNKNOWN	SYBR	None				0.119052	0.0286881	0.494054	29.6567	29.7821	1.06175		-1.708	0.739461	3.07033	TRUE	0.492056	TRUE	1	40		1.58234	0.980655	86.4716			N	Y	N	N	N	N	N	N	N	N	N
209	I17	FALSE	Old leaves	FcARF17	UNKNOWN	SYBR	None				0.345248	0.047893	2.4888	30.966	32.3528	1.62709		0.862794	1.0264	1.5343	TRUE	0.477253	TRUE	1	40		1.60293	0.990422	82.659			N	Y	N	N	N	N	N	N	N	N	N
210	I18	FALSE	Old leaves	FcARF18	UNKNOWN	SYBR	None				0.625709	0.1144	3.4223	33.679	32.1966	1.35115		0.706511	0.882929	0.676435	TRUE	0.46441	TRUE	1	40		1.58996	0.984019	83.3163			N	Y	N	N	N	N	N	N	N	N	N
211	I19	FALSE	Old leaves	FcARF19	UNKNOWN	SYBR	None				0.142065	0.0416721	0.484317	30.9259	30.7458	0.839836		-0.744216	0.637289	2.81538	TRUE	0.529257	TRUE	1	40		1.58964	0.981317	82.5276			N	Y	N	N	N	N	N	N	N	N	N
212	I20	FALSE	Old leaves	FcARF20	UNKNOWN	SYBR	None							31.9599	31.49	0.716302					TRUE	0.300923	TRUE	1	40		1.58242	0.980917	84.2366			N	N	N	N	N	N	N	N	N	N	N
213	I21	FALSE	Old leaves	Actin	UNKNOWN	SYBR	None				0.422912	0.106424	1.68058	32.2675	31.4375	1.01435		-0.0525068	0.716936	1.24157	TRUE	0.402462	TRUE	1	40		1.52409	0.971321	85.9457			N	N	N	N	N	N	N	N	N	N	N
214	I22	FALSE	Peel	FcARF9	UNKNOWN	SYBR	None				4.15523	1.69182	10.2056	31.5253	31.2609	0.375411		-0.229148	0.466912	-2.05493	TRUE	0.34101	TRUE	1	40		1.50203	0.967406	84.1052			N	Y	N	N	N	Y	N	N	N	N	N
215	I23	FALSE	Peel	FcARF9	UNKNOWN	SYBR	None				7.92204	3.48589	18.0036	24.1318	24.2402	0.181089		-7.24986	0.426568	-2.98587	TRUE	0.34101	TRUE	1	40		1.48784	0.969226	84.2366	77.5318		N	Y	N	N	N	N	N	N	N	N	Y
216	I24	FALSE	Peel	FcARF9	UNKNOWN	SYBR	None				0.924908	0.311453	2.74666	29.0598	30.123	0.921034		2.04616	0.565579	0.112617	TRUE	0.34101	TRUE	1	40		1.4839	0.951182	84.1052			N	Y	N	N	N	N	N	N	N	N	N
217	J1	FALSE	New leaves	FcARF1	UNKNOWN	SYBR	None				0.924908	0.311453	2.74666	30.6752	30.123	0.921034		2.04616	0.565579	0.112617	TRUE	0.2	TRUE	1	40		0	0	83.4478			N	N	N	N	N	N	Y	Y	Y	N	N
218	J2	FALSE	New leaves	FcARF2	UNKNOWN	SYBR	None				0.924908	0.311453	2.74666	30.6341	30.123	0.921034		2.04616	0.565579	0.112617	TRUE	0.377308	TRUE	1	40		1.58706	0.981121	84.2366			N	Y	N	N	N	N	N	N	N	N	N
219	J3	FALSE	New leaves	FcARF3	UNKNOWN	SYBR	None							29.8677	28.8356	1.41824					TRUE	0.04	TRUE	1	40		0.526972	0.304136	61.6243			N	Y	N	N	N	N	N	Y	N	N	N
220	J4	FALSE	New leaves	FcARF4	UNKNOWN	SYBR	None				0.402268	0.0521245	3.10449	30.2477	29.6226	1.05294		-0.434022	1.06183	1.31377	TRUE	0.526067	TRUE	1	40		1.60284	0.982161	82.2646			N	Y	N	N	N	N	N	N	N	N	N
221	J5	FALSE	New leaves	FcARF5	UNKNOWN	SYBR	None				3.02878	0.00140611	524.029	29.7497	29.381	4.764		2.32438	3.47934	-1.59874	TRUE	0.155571	TRUE	1	40		1.3921	0.967541	82.3961	75.4283		N	Y	N	N	N	N	N	N	N	N	Y
222	J6	FALSE	New leaves	FcARF6	UNKNOWN	SYBR	None				1.54449	0.153454	15.5449	30.42	29.6334	1.43001		-0.423215	1.19982	-0.627127	TRUE	0.267971	TRUE	1	40		1.5339	0.981474	84.7625	75.6913		N	Y	N	N	N	N	N	N	N	N	Y
223	J7	FALSE	New leaves	FcARF7	UNKNOWN	SYBR	None				0.283238	0.018312	4.38095	31.6729	30.3483	1.94983		0.291626	1.4231	1.81991	TRUE	0.241364	TRUE	1	40		1.46717	0.976326	82.2646	77.0059		N	Y	N	N	N	N	N	N	N	N	Y
224	J8	FALSE	New leaves	FcARF8	UNKNOWN	SYBR	None				2.71723	0.26168	28.2151	29.4317	29.7633	1.47052		-0.293356	1.21604	-1.44214	TRUE	0.283002	TRUE	1	40		1.60171	0.992146	84.1052			N	Y	N	N	N	N	N	N	N	N	N
225	J9	FALSE	New leaves	FcARF9	UNKNOWN	SYBR	None				0.762261	0.11224	5.17677	28.4987	28.4234	0.835889		-1.63328	0.995408	0.391643	TRUE	0.34101	TRUE	1	40		1.50229	0.969211	84.1052	77.9262		N	Y	N	N	N	N	N	N	N	N	Y
226	J10	FALSE	New leaves	FcARF10	UNKNOWN	SYBR	None				0.462234	0.0557671	3.8313	29.517	28.6052	1.16154		-1.45139	1.09894	1.11331	TRUE	0.556608	TRUE	1	40		1.61327	0.989831	83.8422			N	Y	N	N	N	N	N	N	N	N	N
227	J11	FALSE	New leaves	FcARF11	UNKNOWN	SYBR	None				1.38272	0.109902	17.3965	33.0756	31.5227	1.70883		1.46604	1.31579	-0.46751	TRUE	0.386811	TRUE	1	40		1.53449	0.974735	83.5793			N	Y	N	N	N	N	N	N	N	N	N
228	J12	FALSE	New leaves	FcARF12	UNKNOWN	SYBR	None				0.699882	0.0955208	5.12805	28.8635	27.9487	0.969015		-2.10793	1.03486	0.514816	TRUE	0.558734	TRUE	1	40		1.59368	0.982562	83.8422			N	Y	N	N	N	N	N	N	N	N	N
229	J13	FALSE	New leaves	FcARF13	UNKNOWN	SYBR	None				0.460373	0.0590767	3.5876	29.012	28.3239	1.06814		-1.7327	1.06688	1.11912	TRUE	0.344091	TRUE	1	40		1.50419	0.980374	81.2129			N	N	N	N	N	N	N	N	N	N	N
230	J14	FALSE	New leaves	FcARF14	UNKNOWN	SYBR	None				0.670697	0.0498644	9.02115	31.5842	29.9027	1.78822		-0.153947	1.3505	0.576267	TRUE	0.297491	TRUE	1	40		1.54038	0.981455	82.5276			N	Y	N	N	N	N	N	N	N	N	N
231	J15	FALSE	New leaves	FcARF15	UNKNOWN	SYBR	None				2.24341	0.414147	12.1525	26.1943	26.0345	0.195959		-4.02218	0.877915	-1.1657	TRUE	0.203861	TRUE	1	40		1.5529	0.982651	88.3121			N	Y	N	N	N	N	N	N	N	N	N
232	J16	FALSE	New leaves	FcARF16	UNKNOWN	SYBR	None				1.15302	0.0824539	16.1237	26.051	25.0729	1.83377		-4.98375	1.37071	-0.205419	TRUE	0.492056	TRUE	1	40		1.59009	0.983982	86.4716			N	Y	N	N	N	N	N	N	N	N	N
233	J17	FALSE	New leaves	FcARF17	UNKNOWN	SYBR	None				0.357418	0.0309808	4.12345	32.5604	30.8695	1.60331		0.812813	1.27075	1.48431	TRUE	0.477253	TRUE	1	40		1.59645	0.991485	82.659			N	N	N	N	N	N	N	N	N	N	N
234	J18	FALSE	New leaves	FcARF18	UNKNOWN	SYBR	None				0.27327	0.0337825	2.21051	32.4852	31.9583	1.12524		1.90168	1.08627	1.8716	TRUE	0.46441	TRUE	1	40		1.60401	0.983085	83.0534			N	Y	N	N	N	N	N	N	N	N	N
235	J19	FALSE	New leaves	FcARF19	UNKNOWN	SYBR	None				0.813719	0.151669	4.36569	26.9215	26.7944	0.110232		-3.26219	0.872917	0.297398	TRUE	0.529257	TRUE	1	40		1.5955	0.976947	82.3961			N	Y	N	N	N	N	N	N	N	N	N
236	J20	FALSE	New leaves	FcARF20	UNKNOWN	SYBR	None							31.1655	30.0566	1.50791					TRUE	0.300923	TRUE	1	40		1.60028	0.964783	83.9737	87.2604		N	Y	N	N	N	N	N	N	N	N	Y
237	J21	FALSE	New leaves	Actin	UNKNOWN	SYBR	None				0.60617	0.0562944	6.52714	29.836	29.4848	1.51697		-0.571873	1.23491	0.722206	TRUE	0.402462	TRUE	1	40		1.52985	0.976803	85.8142			N	N	N	N	N	N	N	N	N	N	N
238	J22	FALSE	Peel	FcARF10	UNKNOWN	SYBR	None				11.2387	1.82019	69.3927	28.9211	28.392	0.640723		-1.66462	0.945926	-3.4904	TRUE	0.556608	TRUE	1	40		1.56401	0.987527	83.8422			N	N	N	N	N	N	N	N	N	N	N
239	J23	FALSE	Peel	FcARF10	UNKNOWN	SYBR	None				3.13229	0.571562	17.1657	23.8396	24.1454	0.26514		-5.91121	0.88395	-1.64722	TRUE	0.556608	TRUE	1	40		1.56436	0.980389	83.9737			N	N	N	N	N	N	N	N	N	N	N
240	J24	FALSE	Peel	FcARF10	UNKNOWN	SYBR	None				0.682356	0.447328	1.04087	26.2126	26.0055	0.181914		-2.07134	0.219414	0.551404	TRUE	0.556608	TRUE	1	40		1.57701	0.9811	83.8422			N	N	N	N	N	N	N	N	N	N	N
241	K1	FALSE	New leaves	FcARF1	UNKNOWN	SYBR	None				0.682356	0.447328	1.04087	25.8715	26.0055	0.181914		-2.07134	0.219414	0.551404	TRUE	0.2	TRUE	1	40		0.831526	0	69.2494			Y	N	N	N	Y	N	Y	Y	Y	N	N
242	K2	FALSE	New leaves	FcARF2	UNKNOWN	SYBR	None				0.682356	0.447328	1.04087	25.9324	26.0055	0.181914		-2.07134	0.219414	0.551404	TRUE	0.377308	TRUE	1	40		1.59402	0.992384	84.1052			N	Y	N	N	N	Y	N	N	N	N	N
243	K3	FALSE	New leaves	FcARF3	UNKNOWN	SYBR	None							29.4208	28.8356	1.41824					TRUE	0.04	TRUE	1	40		0.858057	0.599395	82.1332			N	Y	N	N	N	N	N	Y	Y	N	N
244	K4	FALSE	New leaves	FcARF4	UNKNOWN	SYBR	None				0.402268	0.0521245	3.10449	28.407	29.6226	1.05294		-0.434022	1.06183	1.31377	TRUE	0.526067	TRUE	1	40		1.60347	0.979567	82.1332			N	Y	N	N	N	N	N	N	N	N	N
245	K5	FALSE	New leaves	FcARF5	UNKNOWN	SYBR	None				3.02878	0.00140611	524.029	29.0124	29.381	4.764		2.32438	3.47934	-1.59874	TRUE	0.155571	TRUE	1	40		1.44423	0.974736	82.2646			N	Y	N	N	N	N	N	N	N	N	N
246	K6	FALSE	New leaves	FcARF6	UNKNOWN	SYBR	None				1.54449	0.153454	15.5449	27.9828	29.6334	1.43001		-0.423215	1.19982	-0.627127	TRUE	0.267971	TRUE	1	40		1.55755	0.986268	84.2366	75.2969		N	Y	N	N	N	N	N	N	N	N	Y
247	K7	FALSE	New leaves	FcARF7	UNKNOWN	SYBR	None				0.283238	0.018312	4.38095	28.1093	30.3483	1.94983		0.291626	1.4231	1.81991	TRUE	0.241364	TRUE	1	40		1.47756	0.972112	82.2646	77.0059		N	Y	N	N	N	N	N	N	N	N	Y
248	K8	FALSE	New leaves	FcARF8	UNKNOWN	SYBR	None				2.71723	0.26168	28.2151	28.4868	29.7633	1.47052		-0.293356	1.21604	-1.44214	TRUE	0.283002	TRUE	1	40		1.59433	0.992129	83.8422			N	Y	N	N	N	N	N	N	N	N	N
249	K9	FALSE	New leaves	FcARF9	UNKNOWN	SYBR	None				0.762261	0.11224	5.17677	27.5523	28.4234	0.835889		-1.63328	0.995408	0.391643	TRUE	0.34101	TRUE	1	40		1.4952	0.97483	84.2366	77.2689		N	Y	N	N	N	N	N	N	N	N	Y
250	K10	FALSE	New leaves	FcARF10	UNKNOWN	SYBR	None				0.462234	0.0557671	3.8313	27.2975	28.6052	1.16154		-1.45139	1.09894	1.11331	TRUE	0.556608	TRUE	1	40		1.6521	0.978914	83.8422			N	Y	N	N	N	N	N	N	N	Y	N
251	K11	FALSE	New leaves	FcARF11	UNKNOWN	SYBR	None				1.38272	0.109902	17.3965	29.6919	31.5227	1.70883		1.46604	1.31579	-0.46751	TRUE	0.386811	TRUE	1	40		1.47966	0.983005	83.4478			N	Y	N	N	N	N	N	N	N	N	N
252	K12	FALSE	New leaves	FcARF12	UNKNOWN	SYBR	None				0.699882	0.0955208	5.12805	26.9333	27.9487	0.969015		-2.10793	1.03486	0.514816	TRUE	0.558734	TRUE	1	40		1.61818	0.98612	83.7108	88.4436		N	Y	N	N	N	N	N	N	N	N	Y
253	K13	FALSE	New leaves	FcARF13	UNKNOWN	SYBR	None				0.460373	0.0590767	3.5876	27.0934	28.3239	1.06814		-1.7327	1.06688	1.11912	TRUE	0.344091	TRUE	1	40		1.50525	0.979908	81.2129			N	N	N	N	N	N	N	N	N	N	N
254	K14	FALSE	New leaves	FcARF14	UNKNOWN	SYBR	None				0.670697	0.0498644	9.02115	28.0241	29.9027	1.78822		-0.153947	1.3505	0.576267	TRUE	0.297491	TRUE	1	40		1.53466	0.987146	82.5276			N	Y	N	N	N	N	N	N	N	N	N
255	K15	FALSE	New leaves	FcARF15	UNKNOWN	SYBR	None				2.24341	0.414147	12.1525	25.8158	26.0345	0.195959		-4.02218	0.877915	-1.1657	TRUE	0.203861	TRUE	1	40		1.51792	0.977517	88.0492	82.5276	78.715	N	Y	N	N	N	N	N	N	N	N	Y
256	K16	FALSE	New leaves	FcARF16	UNKNOWN	SYBR	None				1.15302	0.0824539	16.1237	22.9574	25.0729	1.83377		-4.98375	1.37071	-0.205419	TRUE	0.492056	TRUE	1	40		1.58357	0.988353	86.4716			N	Y	N	N	N	N	N	N	N	N	N
257	K17	FALSE	New leaves	FcARF17	UNKNOWN	SYBR	None				0.357418	0.0309808	4.12345	29.3711	30.8695	1.60331		0.812813	1.27075	1.48431	TRUE	0.477253	TRUE	1	40		1.593	0.984393	82.5276	86.3401		N	N	N	N	N	N	N	N	N	N	Y
258	K18	FALSE	New leaves	FcARF18	UNKNOWN	SYBR	None				0.27327	0.0337825	2.21051	30.6663	31.9583	1.12524		1.90168	1.08627	1.8716	TRUE	0.46441	TRUE	1	40		1.60257	0.971867	83.1849			N	Y	N	N	N	N	N	N	N	N	N
259	K19	FALSE	New leaves	FcARF19	UNKNOWN	SYBR	None				0.813719	0.151669	4.36569	26.7381	26.7944	0.110232		-3.26219	0.872917	0.297398	TRUE	0.529257	TRUE	1	40		1.59368	0.970777	82.2646			N	Y	N	N	N	N	N	N	N	N	N
260	K20	FALSE	New leaves	FcARF20	UNKNOWN	SYBR	None							28.3396	30.0566	1.50791					TRUE	0.300923	TRUE	1	40		1.60173	0.971488	83.9737	88.575		N	Y	N	N	N	N	N	N	N	N	Y
261	K21	FALSE	New leaves	Actin	UNKNOWN	SYBR	None				0.60617	0.0562944	6.52714	27.823	29.4848	1.51697		-0.571873	1.23491	0.722206	TRUE	0.402462	TRUE	1	40		1.52717	0.959921	85.8142			N	N	N	N	N	N	N	N	N	N	N
262	K22	FALSE	Peel	FcARF11	UNKNOWN	SYBR	None				11.2387	1.82019	69.3927	27.6796	28.392	0.640723		-1.66462	0.945926	-3.4904	TRUE	0.386811	TRUE	1	40		1.4987	0.974247	83.5793			N	N	N	N	N	N	N	N	N	N	N
263	K23	FALSE	Peel	FcARF11	UNKNOWN	SYBR	None				3.13229	0.571562	17.1657	24.2857	24.1454	0.26514		-5.91121	0.88395	-1.64722	TRUE	0.386811	TRUE	1	40		1.51337	0.953611	83.5793			N	N	N	N	N	N	N	N	N	N	N
264	K24	FALSE	Peel	FcARF11	UNKNOWN	SYBR	None				0.648587	0.397253	1.05893	25.8478	25.8497	0.288663		-2.2272	0.254729	0.624628	TRUE	0.386811	TRUE	1	40		1.52719	0.973052	83.7108			N	N	N	N	N	N	N	N	N	N	N
265	L1	FALSE	New leaves	FcARF1	UNKNOWN	SYBR	None				0.648587	0.397253	1.05893	26.1393	25.8497	0.288663		-2.2272	0.254729	0.624628	TRUE	0.2	TRUE	1	40		0	0	92.9134			N	N	N	N	N	N	N	Y	Y	N	N
266	L2	FALSE	New leaves	FcARF2	UNKNOWN	SYBR	None				0.648587	0.397253	1.05893	25.562	25.8497	0.288663		-2.2272	0.254729	0.624628	TRUE	0.377308	TRUE	1	40		1.58554	0.978085	84.1052			N	Y	N	N	N	N	N	N	N	N	N
267	L3	FALSE	New leaves	FcARF3	UNKNOWN	SYBR	None							27.2185	28.8356	1.41824					TRUE	0.04	TRUE	1	40		0.599273	0	81.6073			N	N	N	N	N	N	N	Y	N	N	N
268	L4	FALSE	New leaves	FcARF4	UNKNOWN	SYBR	None				0.402268	0.0521245	3.10449	30.2132	29.6226	1.05294		-0.434022	1.06183	1.31377	TRUE	0.526067	TRUE	1	40		1.5915	0.978376	82.0017	87.2604		N	Y	N	N	N	N	N	N	N	N	Y
269	L5	FALSE	New leaves	FcARF5	UNKNOWN	SYBR	None				3.02878	0.00140611	524.029	29.4208	29.381	4.764					TRUE	0.155571	TRUE	1	40		1.41402	0.959728	82.2646	75.1654		N	Y	N	N	N	N	N	N	N	N	Y
270	L6	FALSE	New leaves	FcARF6	UNKNOWN	SYBR	None				1.54449	0.153454	15.5449	30.4975	29.6334	1.43001		-0.423215	1.19982	-0.627127	TRUE	0.267971	TRUE	1	40		1.54473	0.988727	75.5598	84.7625		N	Y	N	N	N	N	N	N	N	N	Y
271	L7	FALSE	New leaves	FcARF7	UNKNOWN	SYBR	None				0.283238	0.018312	4.38095	31.2626	30.3483	1.94983		0.291626	1.4231	1.81991	TRUE	0.241364	TRUE	1	40		1.36942	0.973503	77.1374	82.3961		N	Y	N	N	N	N	N	N	N	N	Y
272	L8	FALSE	New leaves	FcARF8	UNKNOWN	SYBR	None				2.71723	0.26168	28.2151	31.3713	29.7633	1.47052		-0.293356	1.21604	-1.44214	TRUE	0.283002	TRUE	1	40		1.59991	0.986419	83.9737			N	Y	N	N	N	N	N	N	N	N	N
273	L9	FALSE	New leaves	FcARF9	UNKNOWN	SYBR	None				0.762261	0.11224	5.17677	29.219	28.4234	0.835889		-1.63328	0.995408	0.391643	TRUE	0.34101	TRUE	1	40		1.49722	0.985404	84.1052	78.1891		N	Y	N	N	N	N	N	N	N	N	Y
274	L10	FALSE	New leaves	FcARF10	UNKNOWN	SYBR	None				0.462234	0.0557671	3.8313	29.0012	28.6052	1.16154		-1.45139	1.09894	1.11331	TRUE	0.556608	TRUE	1	40		1.62082	0.98984	83.8422			N	Y	N	N	N	N	N	N	N	N	N
275	L11	FALSE	New leaves	FcARF11	UNKNOWN	SYBR	None				1.38272	0.109902	17.3965	31.8005	31.5227	1.70883		1.46604	1.31579	-0.46751	TRUE	0.386811	TRUE	1	40		1.52174	0.980944	83.5793			N	Y	N	N	N	N	N	N	N	N	N
276	L12	FALSE	New leaves	FcARF12	UNKNOWN	SYBR	None				0.699882	0.0955208	5.12805	28.0493	27.9487	0.969015		-2.10793	1.03486	0.514816	TRUE	0.558734	TRUE	1	40		1.59739	0.979227	83.8422			N	Y	N	N	N	N	N	N	N	N	N
277	L13	FALSE	New leaves	FcARF13	UNKNOWN	SYBR	None				0.460373	0.0590767	3.5876	28.8664	28.3239	1.06814		-1.7327	1.06688	1.11912	TRUE	0.344091	TRUE	1	40		1.50861	0.976211	81.2129			N	N	N	N	N	N	N	N	N	N	N
278	L14	FALSE	New leaves	FcARF14	UNKNOWN	SYBR	None				0.670697	0.0498644	9.02115	30.0998	29.9027	1.78822		-0.153947	1.3505	0.576267	TRUE	0.297491	TRUE	1	40		1.54499	0.984669	82.5276			N	Y	N	N	N	N	N	N	N	N	N
279	L15	FALSE	New leaves	FcARF15	UNKNOWN	SYBR	None				2.24341	0.414147	12.1525	26.0932	26.0345	0.195959		-4.02218	0.877915	-1.1657	TRUE	0.203861	TRUE	1	40		1.51727	0.97936	88.1806	78.715	84.631	N	Y	N	N	N	N	N	N	N	N	Y
280	L16	FALSE	New leaves	FcARF16	UNKNOWN	SYBR	None				1.15302	0.0824539	16.1237	26.2103	25.0729	1.83377		-4.98375	1.37071	-0.205419	TRUE	0.492056	TRUE	1	40		1.56264	0.983344	86.603	76.743		N	Y	N	N	N	N	N	N	N	N	Y
281	L17	FALSE	New leaves	FcARF17	UNKNOWN	SYBR	None				0.357418	0.0309808	4.12345	30.6768	30.8695	1.60331		0.812813	1.27075	1.48431	TRUE	0.477253	TRUE	1	40		1.60112	0.990909	82.659			N	N	N	N	N	N	N	N	N	N	N
282	L18	FALSE	New leaves	FcARF18	UNKNOWN	SYBR	None				0.27327	0.0337825	2.21051	32.7234	31.9583	1.12524		1.90168	1.08627	1.8716	TRUE	0.46441	TRUE	1	40		1.59535	0.985177	83.1849			N	Y	N	N	N	N	N	N	N	N	N
283	L19	FALSE	New leaves	FcARF19	UNKNOWN	SYBR	None				0.813719	0.151669	4.36569	26.7237	26.7944	0.110232		-3.26219	0.872917	0.297398	TRUE	0.529257	TRUE	1	40		1.58007	0.967366	82.2646			N	Y	N	N	N	N	N	N	N	N	N
284	L20	FALSE	New leaves	FcARF20	UNKNOWN	SYBR	None							30.6648	30.0566	1.50791					TRUE	0.300923	TRUE	1	40		1.55807	0.970758	84.1052			N	Y	N	N	N	N	N	N	N	N	N
285	L21	FALSE	New leaves	Actin	UNKNOWN	SYBR	None				0.60617	0.0562944	6.52714	30.7953	29.4848	1.51697		-0.571873	1.23491	0.722206	TRUE	0.402462	TRUE	1	40		1.53321	0.952901	85.9457			N	N	N	N	N	N	N	N	N	N	N
286	L22	FALSE	Peel	FcARF12	UNKNOWN	SYBR	None				11.2387	1.82019	69.3927	28.5753	28.392	0.640723		-1.66462	0.945926	-3.4904	TRUE	0.558734	TRUE	1	40		1.57431	0.969485	83.8422			N	N	N	N	N	N	N	N	N	N	N
287	L23	FALSE	Peel	FcARF12	UNKNOWN	SYBR	None				3.13229	0.571562	17.1657	24.311	24.1454	0.26514		-5.91121	0.88395	-1.64722	TRUE	0.558734	TRUE	1	40		1.58277	0.971696	83.7108	88.3121		N	N	N	N	N	N	N	N	N	N	Y
288	L24	FALSE	Peel	FcARF12	UNKNOWN	SYBR	None				0.272125	0.184284	0.401836	29.3367	29.2243	0.108309		1.14744	0.202538	1.87766	TRUE	0.558734	TRUE	1	40		1.583	0.96372	83.8422			N	N	N	N	N	N	N	N	N	N	N
289	M1	FALSE	Flower	FcARF1	UNKNOWN	SYBR	None				0.272125	0.184284	0.401836	29.1206	29.2243	0.108309		1.14744	0.202538	1.87766	TRUE	0.2	TRUE	1	40		0	0	84.631			N	N	Y	N	N	N	Y	Y	Y	N	N
290	M2	FALSE	Flower	FcARF2	UNKNOWN	SYBR	None				0.272125	0.184284	0.401836	29.2156	29.2243	0.108309		1.14744	0.202538	1.87766	TRUE	0.377308	TRUE	1	40		1.59323	0.979747	84.1052			N	N	N	N	N	N	N	N	N	N	N
291	M3	FALSE	Flower	FcARF3	UNKNOWN	SYBR	None				3.68001	0.654656	20.6864	31.9933	30.9088	1.14148					TRUE	0.04	TRUE	1	40		0	0	68.1977			N	N	N	N	N	N	Y	Y	N	N	N
292	M4	FALSE	Flower	FcARF4	UNKNOWN	SYBR	None				1	0.684659	1.46058	27.0827	26.9921	0.182699		-1.74779	0.19685	0	TRUE	0.526067	TRUE	1	40		1.60855	0.981343	82.2646			N	Y	N	N	N	N	N	N	N	N	N
293	M5	FALSE	Flower	FcARF5	UNKNOWN	SYBR	None				2.27214	0.0751244	68.7211	26.6174	29.5016	2.83097					TRUE	0.155571	TRUE	1	40		1.47088	0.981449	82.1332			N	N	N	N	N	N	N	N	N	N	N
294	M6	FALSE	Flower	FcARF6	UNKNOWN	SYBR	None				1	0.267489	3.73848	29.1243	28.9438	1.15138		0.203912	0.685211	0	TRUE	0.267971	TRUE	1	40		1.56489	0.983287	84.3681	76.743		N	Y	N	N	N	N	N	N	N	N	Y
295	M7	FALSE	Flower	FcARF7	UNKNOWN	SYBR	None				1	0.586167	1.706	27.0651	27.2116	0.385019		-1.52829	0.277555	0	TRUE	0.241364	TRUE	1	40		1.5109	0.973593	82.3961			N	N	N	N	N	N	N	N	N	N	N
296	M8	FALSE	Flower	FcARF8	UNKNOWN	SYBR	None				1	0.49985	2.0006	30.4735	29.8887	0.55375		1.14878	0.360328	0	TRUE	0.283002	TRUE	1	40		1.60712	0.989356	83.9737			N	N	N	N	N	N	N	N	N	N	N
297	M9	FALSE	Flower	FcARF9	UNKNOWN	SYBR	None				1	0.685391	1.45902	26.7562	26.715	0.0583717		-2.02493	0.171252	0	TRUE	0.34101	TRUE	1	40		1.51324	0.974496	84.1052			N	Y	N	N	N	N	N	N	N	N	N
298	M10	FALSE	Flower	FcARF10	UNKNOWN	SYBR	None				1	0.714515	1.39955	26.2419	26.1752	0.0930508		-2.5647	0.174671	0	TRUE	0.556608	TRUE	1	40		1.59622	0.976395	83.8422			N	N	N	N	N	N	N	N	N	N	N
299	M11	FALSE	Flower	FcARF11	UNKNOWN	SYBR	None				1	0.317175	3.15283	31.7841	30.6734	0.992577		1.93355	0.596679	0	TRUE	0.386811	TRUE	1	40		1.54505	0.981906	83.5793			N	N	N	N	N	N	N	N	N	N	N
300	M12	FALSE	Flower	FcARF12	UNKNOWN	SYBR	None				1	0.712589	1.40333	26.1444	26.1172	0.10067		-2.62275	0.176073	0	TRUE	0.558734	TRUE	1	40		1.58771	0.977106	83.8422			N	N	N	N	N	N	N	N	N	N	N
301	M13	FALSE	Flower	FcARF13	UNKNOWN	SYBR	None				1	0.714238	1.40009	25.8235	25.8881	0.0941801		-2.85183	0.174872	0	TRUE	0.344091	TRUE	1	40		1.4993	0.992165	81.2129			N	N	N	N	N	N	N	N	N	N	N
302	M14	FALSE	Flower	FcARF14	UNKNOWN	SYBR	None				1	0.697867	1.43294	28.0716	28.0097	0.148147		-0.730214	0.186921	0	TRUE	0.297491	TRUE	1	40		1.52734	0.975409	82.5276			N	N	N	N	N	N	N	N	N	N	N
303	M15	FALSE	Flower	FcARF15	UNKNOWN	SYBR	None				1	0.718686	1.39143	25.9692	25.8834	0.0742731		-2.85649	0.171646	0	TRUE	0.203861	TRUE	1	40		1.50018	0.96123	88.0492			N	N	N	N	N	N	N	N	N	N	N
304	M16	FALSE	Flower	FcARF16	UNKNOWN	SYBR	None				1	0.726186	1.37706	23.9659	23.9616	0.00692584		-4.77833	0.166252	0	TRUE	0.492056	TRUE	1	40		1.59712	0.982154	86.4716			N	N	N	N	N	N	N	N	N	N	N
305	M17	FALSE	Flower	FcARF17	UNKNOWN	SYBR	None				1	0.724968	1.37937	28.0931	28.0684	0.0303363		-0.671501	0.167124	0	TRUE	0.477253	TRUE	1	40		1.59298	0.980991	82.5276			N	N	N	N	N	N	N	N	N	N	N
306	M18	FALSE	Flower	FcARF18	UNKNOWN	SYBR	None				1	0.694437	1.44001	28.6183	28.77	0.157602		0.0300757	0.189481	0	TRUE	0.46441	TRUE	1	40		1.59374	0.981368	82.9219			N	N	N	N	N	N	N	N	N	N	N
307	M19	FALSE	Flower	FcARF19	UNKNOWN	SYBR	None				1	0.6903	1.44864	25.2638	25.1803	0.168514		-3.55959	0.192586	0	TRUE	0.529257	TRUE	1	40		1.59731	0.978237	82.2646			N	N	N	N	N	N	N	N	N	N	N
308	M20	FALSE	Flower	FcARF20	UNKNOWN	SYBR	None							28.6541	28.7399	0.287873					TRUE	0.300923	TRUE	1	40		1.59265	0.978054	84.1052			N	Y	N	N	N	N	N	N	N	N	N
309	M21	FALSE	Flower	Actin	UNKNOWN	SYBR	None				1	0.605817	1.65066	27.0498	27.4458	0.347257		-1.29408	0.260422	0	TRUE	0.402462	TRUE	1	40		1.53437	0.973695	85.9457			N	N	N	N	N	N	N	N	N	N	N
310	M22	FALSE	Peel	FcARF13	UNKNOWN	SYBR	None				1	0.280002	3.5714	30.4251	30.5657	1.10892		1.82578	0.661454	0	TRUE	0.344091	TRUE	1	40		1.49143	0.962566	81.2129			N	N	N	N	N	N	N	N	N	N	N
311	M23	FALSE	Peel	FcARF13	UNKNOWN	SYBR	None				1	0.658267	1.51914	24.725	24.4759	0.242397		-4.26399	0.217276	0	TRUE	0.344091	TRUE	1	40		1.49836	0.932211	81.0814			N	N	N	N	N	N	N	N	N	N	N
312	M24	FALSE	Peel	FcARF13	UNKNOWN	SYBR	None				0.563581	0.360961	0.879938	25.8456	26.0477	0.222392		-2.02918	0.231512	0.827305	TRUE	0.344091	TRUE	1	40		1.48541	0.971887	81.2129			N	N	N	N	N	N	N	N	N	N	N
313	N1	FALSE	Flower	FcARF1	UNKNOWN	SYBR	None				0.563581	0.360961	0.879938	26.286	26.0477	0.222392		-2.02918	0.231512	0.827305	TRUE	0.2	TRUE	1	40		0	0	83.7108			N	N	N	N	N	N	N	Y	Y	N	N
314	N2	FALSE	Flower	FcARF2	UNKNOWN	SYBR	None				0.563581	0.360961	0.879938	26.0114	26.0477	0.222392		-2.02918	0.231512	0.827305	TRUE	0.377308	TRUE	1	40		1.58142	0.984623	84.1052			N	N	N	N	N	N	N	N	N	N	N
315	N3	FALSE	Flower	FcARF3	UNKNOWN	SYBR	None				3.68001	0.654656	20.6864	31.0152	30.9088	1.14148					TRUE	0.04	TRUE	1	40		0.653915	0	60.967			N	N	N	N	N	N	N	Y	N	N	N
316	N4	FALSE	Flower	FcARF4	UNKNOWN	SYBR	None				1	0.684659	1.46058	26.7818	26.9921	0.182699		-1.74779	0.19685	0	TRUE	0.526067	TRUE	1	40		1.61315	0.985619	82.3961			N	Y	N	N	N	N	N	N	N	N	N
317	N5	FALSE	Flower	FcARF5	UNKNOWN	SYBR	None				2.27214	0.0751244	68.7211	29.6112	29.5016	2.83097		3.92312		0	TRUE	0.155571	TRUE	1	40		1.47246	0.973373	82.1332			N	N	N	N	N	N	N	N	N	N	N
318	N6	FALSE	Flower	FcARF6	UNKNOWN	SYBR	None				1	0.267489	3.73848	29.9943	28.9438	1.15138		0.203912	0.685211	0	TRUE	0.267971	TRUE	1	40		1.55786	0.983798	84.4996	75.4283		N	Y	N	N	N	N	N	N	N	N	Y
319	N7	FALSE	Flower	FcARF7	UNKNOWN	SYBR	None				1	0.586167	1.706	27.6484	27.2116	0.385019		-1.52829	0.277555	0	TRUE	0.241364	TRUE	1	40		1.51608	0.979959	82.3961			N	N	N	N	N	N	N	N	N	N	N
320	N8	FALSE	Flower	FcARF8	UNKNOWN	SYBR	None				1	0.49985	2.0006	29.3723	29.8887	0.55375		1.14878	0.360328	0	TRUE	0.283002	TRUE	1	40		1.59245	0.992622	83.9737			N	N	N	N	N	N	N	N	N	N	N
321	N9	FALSE	Flower	FcARF9	UNKNOWN	SYBR	None				1	0.685391	1.45902	26.6737	26.715	0.0583717		-2.02493	0.171252	0	TRUE	0.34101	TRUE	1	40		1.52869	0.980048	84.1052			N	Y	N	N	N	N	N	N	N	N	N
322	N10	FALSE	Flower	FcARF10	UNKNOWN	SYBR	None				1	0.714515	1.39955	26.2148	26.1752	0.0930508		-2.5647	0.174671	0	TRUE	0.556608	TRUE	1	40		1.59572	0.988291	83.8422			N	N	N	N	N	N	N	N	N	N	N
323	N11	FALSE	Flower	FcARF11	UNKNOWN	SYBR	None				1	0.317175	3.15283	29.8732	30.6734	0.992577		1.93355	0.596679	0	TRUE	0.386811	TRUE	1	40		1.55256	0.973619	83.5793			N	N	N	N	N	N	N	N	N	N	N
324	N12	FALSE	Flower	FcARF12	UNKNOWN	SYBR	None				1	0.712589	1.40333	26.2014	26.1172	0.10067		-2.62275	0.176073	0	TRUE	0.558734	TRUE	1	40		1.62381	0.979326	83.8422			N	N	N	N	N	N	N	N	N	N	N
325	N13	FALSE	Flower	FcARF13	UNKNOWN	SYBR	None				1	0.714238	1.40009	25.9961	25.8881	0.0941801		-2.85183	0.174872	0	TRUE	0.344091	TRUE	1	40		1.50103	0.985587	81.2129			N	N	N	N	N	N	N	N	N	N	N
326	N14	FALSE	Flower	FcARF14	UNKNOWN	SYBR	None				1	0.697867	1.43294	28.1168	28.0097	0.148147		-0.730214	0.186921	0	TRUE	0.297491	TRUE	1	40		1.52612	0.981291	82.5276			N	N	N	N	N	N	N	N	N	N	N
327	N15	FALSE	Flower	FcARF15	UNKNOWN	SYBR	None				1	0.718686	1.39143	25.8414	25.8834	0.0742731		-2.85649	0.171646	0	TRUE	0.203861	TRUE	1	40		1.53048	0.981185	88.1806	82.1332		N	N	N	N	N	N	N	N	N	N	Y
328	N16	FALSE	Flower	FcARF16	UNKNOWN	SYBR	None				1	0.726186	1.37706	23.9652	23.9616	0.00692584		-4.77833	0.166252	0	TRUE	0.492056	TRUE	1	40		1.5926	0.990269	86.4716			N	N	N	N	N	N	N	N	N	N	N
329	N17	FALSE	Flower	FcARF17	UNKNOWN	SYBR	None				1	0.724968	1.37937	28.0346	28.0684	0.0303363		-0.671501	0.167124	0	TRUE	0.477253	TRUE	1	40		1.58864	0.979727	82.659			N	N	N	N	N	N	N	N	N	N	N
330	N18	FALSE	Flower	FcARF18	UNKNOWN	SYBR	None				1	0.694437	1.44001	28.7587	28.77	0.157602		0.0300757	0.189481	0	TRUE	0.46441	TRUE	1	40		1.61052	0.9873	83.0534			N	N	N	N	N	N	N	N	N	N	N
331	N19	FALSE	Flower	FcARF19	UNKNOWN	SYBR	None				1	0.6903	1.44864	25.2908	25.1803	0.168514		-3.55959	0.192586	0	TRUE	0.529257	TRUE	1	40		1.59625	0.982283	82.2646			N	N	N	N	N	N	N	N	N	N	N
332	N20	FALSE	Flower	FcARF20	UNKNOWN	SYBR	None							28.5047	28.7399	0.287873					TRUE	0.300923	TRUE	1	40		1.51656	0.980025	84.1052			N	Y	N	N	N	N	N	N	N	N	N
333	N21	FALSE	Flower	Actin	UNKNOWN	SYBR	None				1	0.605817	1.65066	27.5894	27.4458	0.347257		-1.29408	0.260422	0	TRUE	0.402462	TRUE	1	40		1.53123	0.953015	85.8142			N	N	N	N	N	N	N	N	N	N	N
334	N22	FALSE	Peel	FcARF14	UNKNOWN	SYBR	None				1	0.280002	3.5714	29.5338	30.5657	1.10892		1.82578	0.661454	0	TRUE	0.297491	TRUE	1	40		1.53421	0.966724	82.5276			N	N	N	N	N	N	N	N	N	N	N
335	N23	FALSE	Peel	FcARF14	UNKNOWN	SYBR	None				1	0.658267	1.51914	24.2408	24.4759	0.242397		-4.26399	0.217276	0	TRUE	0.297491	TRUE	1	40		1.50859	0.972881	82.5276			N	N	N	N	N	N	N	N	N	N	N
336	N24	FALSE	Peel	FcARF14	UNKNOWN	SYBR	None				0.945473	0.635673	1.40626	23.2653	23.3794	0.127797		-4.69744	0.20629	0.0808913	TRUE	0.297491	TRUE	1	40		1.48484	0.970552	82.5276			N	N	N	N	N	N	N	N	N	N	N
337	O1	FALSE	Flower	FcARF1	UNKNOWN	SYBR	None				0.945473	0.635673	1.40626	23.3554	23.3794	0.127797		-4.69744	0.20629	0.0808913	TRUE	0.2	TRUE	1	40		1.10358	0	82.2646			N	N	N	N	N	N	N	Y	Y	Y	N
338	O2	FALSE	Flower	FcARF2	UNKNOWN	SYBR	None				0.945473	0.635673	1.40626	23.5175	23.3794	0.127797		-4.69744	0.20629	0.0808913	TRUE	0.377308	TRUE	1	40		1.58725	0.986703	83.9737			N	N	N	N	N	N	N	N	N	N	N
339	O3	FALSE	Flower	FcARF3	UNKNOWN	SYBR	None				3.68001	0.654656	20.6864	29.7178	30.9088	1.14148		1.44386		0	TRUE	0.04	TRUE	1	40		0.537575	0	81.8702			N	N	N	N	N	N	Y	Y	N	N	N
340	O4	FALSE	Flower	FcARF4	UNKNOWN	SYBR	None				1	0.684659	1.46058	27.1118	26.9921	0.182699		-1.74779	0.19685	0	TRUE	0.526067	TRUE	1	40		1.60747	0.99147	82.1332			N	Y	N	N	N	N	N	N	N	N	N
341	O5	FALSE	Flower	FcARF5	UNKNOWN	SYBR	None				2.27214	0.0751244	68.7211	32.2761	29.5016	2.83097					TRUE	0.155571	TRUE	1	40		1.46815	0.975035	82.2646			N	N	N	N	N	N	N	N	N	N	N
342	O6	FALSE	Flower	FcARF6	UNKNOWN	SYBR	None				1	0.267489	3.73848	27.7128	28.9438	1.15138		0.203912	0.685211	0	TRUE	0.267971	TRUE	1	40		1.54268	0.981033	84.3681	75.4283		N	Y	N	N	N	N	N	N	N	N	Y
343	O7	FALSE	Flower	FcARF7	UNKNOWN	SYBR	None				1	0.586167	1.706	26.9213	27.2116	0.385019		-1.52829	0.277555	0	TRUE	0.241364	TRUE	1	40		0.74009	0	82.3961	76.8745		N	N	N	N	N	N	N	N	N	N	Y
344	O8	FALSE	Flower	FcARF8	UNKNOWN	SYBR	None				1	0.49985	2.0006	29.8202	29.8887	0.55375		1.14878	0.360328	0	TRUE	0.283002	TRUE	1	40		1.59221	0.987696	83.9737			N	N	N	N	N	N	N	N	N	N	N
345	O9	FALSE	Flower	FcARF9	UNKNOWN	SYBR	None				1	0.685391	1.45902	26.3517	26.715	0.0583717					TRUE	0.34101	TRUE	1	40		1.50388	0.977283	85.8142	77.7948	84.2366	N	Y	N	N	N	N	N	N	N	N	Y
346	O10	FALSE	Flower	FcARF10	UNKNOWN	SYBR	None				1	0.714515	1.39955	26.0689	26.1752	0.0930508		-2.5647	0.174671	0	TRUE	0.556608	TRUE	1	40		1.60092	0.98921	83.8422			N	N	N	N	N	N	N	N	N	N	N
347	O11	FALSE	Flower	FcARF11	UNKNOWN	SYBR	None				1	0.317175	3.15283	30.363	30.6734	0.992577		1.93355	0.596679	0	TRUE	0.386811	TRUE	1	40		1.54115	0.981431	83.5793			N	N	N	N	N	N	N	N	N	N	N
348	O12	FALSE	Flower	FcARF12	UNKNOWN	SYBR	None				1	0.712589	1.40333	26.0057	26.1172	0.10067		-2.62275	0.176073	0	TRUE	0.558734	TRUE	1	40		1.61044	0.981804	83.8422			N	N	N	N	N	N	N	N	N	N	N
349	O13	FALSE	Flower	FcARF13	UNKNOWN	SYBR	None				1	0.714238	1.40009	25.8446	25.8881	0.0941801		-2.85183	0.174872	0	TRUE	0.344091	TRUE	1	40		1.50643	0.9899	81.2129			N	N	N	N	N	N	N	N	N	N	N
350	O14	FALSE	Flower	FcARF14	UNKNOWN	SYBR	None				1	0.697867	1.43294	27.8406	28.0097	0.148147		-0.730214	0.186921	0	TRUE	0.297491	TRUE	1	40		1.52968	0.987865	82.5276			N	N	N	N	N	N	N	N	N	N	N
351	O15	FALSE	Flower	FcARF15	UNKNOWN	SYBR	None				1	0.718686	1.39143	25.8396	25.8834	0.0742731		-2.85649	0.171646	0	TRUE	0.203861	TRUE	1	40		1.51223	0.97986	88.1806	77.7948		N	N	N	N	N	N	N	N	N	N	Y
352	O16	FALSE	Flower	FcARF16	UNKNOWN	SYBR	None				1	0.726186	1.37706	23.9536	23.9616	0.00692584		-4.77833	0.166252	0	TRUE	0.492056	TRUE	1	40		1.58398	0.990864	86.4716			N	N	N	N	N	N	N	N	N	N	N
353	O17	FALSE	Flower	FcARF17	UNKNOWN	SYBR	None				1	0.724968	1.37937	28.0775	28.0684	0.0303363		-0.671501	0.167124	0	TRUE	0.477253	TRUE	1	40		1.59852	0.994011	82.659			N	N	N	N	N	N	N	N	N	N	N
354	O18	FALSE	Flower	FcARF18	UNKNOWN	SYBR	None				1	0.694437	1.44001	28.9329	28.77	0.157602		0.0300757	0.189481	0	TRUE	0.46441	TRUE	1	40		1.58574	0.989255	82.9219			N	N	N	N	N	N	N	N	N	N	N
355	O19	FALSE	Flower	FcARF19	UNKNOWN	SYBR	None				1	0.6903	1.44864	24.9863	25.1803	0.168514		-3.55959	0.192586	0	TRUE	0.529257	TRUE	1	40		1.59472	0.987725	82.2646			N	N	N	N	N	N	N	N	N	N	N
356	O20	FALSE	Flower	FcARF20	UNKNOWN	SYBR	None							29.0609	28.7399	0.287873					TRUE	0.300923	TRUE	1	40		1.41304	0.984078	83.7108	79.1094		N	Y	N	N	N	N	N	N	N	N	Y
357	O21	FALSE	Flower	Actin	UNKNOWN	SYBR	None				1	0.605817	1.65066	27.6983	27.4458	0.347257		-1.29408	0.260422	0	TRUE	0.402462	TRUE	1	40		1.53587	0.954198	85.9457			N	N	N	N	N	N	N	N	N	N	N
358	O22	FALSE	Peel	FcARF15	UNKNOWN	SYBR	None				1	0.280002	3.5714	31.7382	30.5657	1.10892		1.82578	0.661454	0	TRUE	0.203861	TRUE	1	40		1.48009	0.966589	88.0492	78.5836	82.3961	N	Y	N	N	N	N	N	N	N	N	Y
359	O23	FALSE	Peel	FcARF15	UNKNOWN	SYBR	None				1	0.658267	1.51914	24.462	24.4759	0.242397		-4.26399	0.217276	0	TRUE	0.203861	TRUE	1	40		1.37266	0.908852	87.7862	82.1332	78.1891	N	Y	N	N	N	N	N	N	N	N	Y
360	O24	FALSE	Peel	FcARF15	UNKNOWN	SYBR	None				0.220909	0.112799	0.432637	29.3903	29.5838	0.504594		1.50697	0.349261	2.17847	TRUE	0.203861	TRUE	1	40		1.47487	0.956847	88.0492	78.715		N	Y	N	N	N	N	N	N	N	N	Y
361	P1	FALSE	Peel	FcARF17	UNKNOWN	SYBR	None				0.220909	0.112799	0.432637	30.1565	29.5838	0.504594		1.50697	0.349261	2.17847	TRUE	0.477253	TRUE	1	40		1.57447	0.973835	82.3961			N	N	N	N	N	N	N	N	N	N	N
362	P2	FALSE	Peel	FcARF17	UNKNOWN	SYBR	None				0.220909	0.112799	0.432637	29.2046	29.5838	0.504594		1.50697	0.349261	2.17847	TRUE	0.477253	TRUE	1	40		1.56769	0.983252	82.3961			N	N	N	N	N	N	N	N	N	N	N
363	P3	FALSE	Peel	FcARF17	UNKNOWN	SYBR	None				0.721794	0.494003	1.05462	24.9462	24.9876	0.0716815		-3.08925	0.197039	0.470341	TRUE	0.477253	TRUE	1	40		1.57155	0.983817	82.3961			N	N	N	N	N	N	N	N	N	N	N
364	P4	FALSE	Peel	FcARF18	UNKNOWN	SYBR	None				0.721794	0.494003	1.05462	25.0704	24.9876	0.0716815		-3.08925	0.197039	0.470341	TRUE	0.46441	TRUE	1	40		1.59194	0.984701	83.0534			N	N	N	N	N	N	N	N	N	N	N
365	P5	FALSE	Peel	FcARF18	UNKNOWN	SYBR	None				0.721794	0.494003	1.05462	24.9463	24.9876	0.0716815		-3.08925	0.197039	0.470341	TRUE	0.46441	TRUE	1	40		1.59965	0.989239	82.7905			N	N	N	N	N	N	N	N	N	N	N
366	P6	FALSE	Peel	FcARF18	UNKNOWN	SYBR	None							28.4335	28.0769	0.333668					TRUE	0.46441	TRUE	1	40		1.61044	0.991608	82.7905			N	N	N	N	N	N	N	N	N	N	N
367	P7	FALSE	Peel	FcARF19	UNKNOWN	SYBR	None							28.0248	28.0769	0.333668					TRUE	0.529257	TRUE	1	40		1.56828	0.975637	82.1332			N	N	N	N	N	N	N	N	N	N	N
368	P8	FALSE	Peel	FcARF19	UNKNOWN	SYBR	None							27.7723	28.0769	0.333668					TRUE	0.529257	TRUE	1	40		1.58443	0.988445	82.2646			N	N	N	N	N	N	N	N	N	N	N
369	P9	FALSE	Peel	FcARF19	UNKNOWN	SYBR	None				1.34332	0.865727	2.08437	26.3386	26.357	0.212142		-1.71988	0.228282	-0.425798	TRUE	0.529257	TRUE	1	40		1.57795	0.97463	82.2646			N	N	N	N	N	N	N	N	N	N	N
370	P10	FALSE	Peel	FcARF20	UNKNOWN	SYBR	None				1.34332	0.865727	2.08437	26.1546	26.357	0.212142		-1.71988	0.228282	-0.425798	TRUE	0.300923	TRUE	1	40		1.55479	0.982632	83.9737			N	Y	N	N	N	N	N	N	N	N	N
371	P11	FALSE	Peel	FcARF20	UNKNOWN	SYBR	None				1.34332	0.865727	2.08437	26.5777	26.357	0.212142		-1.71988	0.228282	-0.425798	TRUE	0.300923	TRUE	1	40		1.57753	0.987099	84.1052			N	Y	N	N	N	N	N	N	N	N	N
372	P12	FALSE	Peel	FcARF20	UNKNOWN	SYBR	None				2.68048	1.10353	6.51089	27.7154	28.4802	0.725707		0.40329	0.461153	-1.42249	TRUE	0.300923	TRUE	1	40		1.57416	0.989994	84.2366			N	Y	N	N	N	N	N	N	N	N	N
373	P13	FALSE	Peel	Actin	UNKNOWN	SYBR	None				2.68048	1.10353	6.51089	28.5658	28.4802	0.725707		0.40329	0.461153	-1.42249	TRUE	0.402462	TRUE	1	40		1.54053	0.935709	86.0772			N	N	N	N	N	N	N	N	N	N	N
374	P14	FALSE	Peel	Actin	UNKNOWN	SYBR	None				2.68048	1.10353	6.51089	29.1592	28.4802	0.725707		0.40329	0.461153	-1.42249	TRUE	0.402462	TRUE	1	40		1.5392	0.991526	86.0772			N	N	N	N	N	N	N	N	N	N	N
375	P15	FALSE	Peel	Actin	UNKNOWN	SYBR	None				1.54734	0.937419	2.55411	23.364	23.1831	0.303501		-4.89378	0.260415	-0.629793	TRUE	0.402462	TRUE	1	40		1.53405	0.990275	86.0772			N	N	N	N	N	Y	N	N	N	N	N
382	P22	FALSE	Peel	FcARF16	UNKNOWN	SYBR	None				1.54734	0.937419	2.55411	23.3525	23.1831	0.303501		-4.89378	0.260415	-0.629793	TRUE	0.492056	TRUE	1	40		1.55524	0.965032	86.3401	79.3723		N	N	N	N	N	N	N	N	N	N	Y
383	P23	FALSE	Peel	FcARF16	UNKNOWN	SYBR	None				1.54734	0.937419	2.55411	22.8327	23.1831	0.303501		-4.89378	0.260415	-0.629793	TRUE	0.492056	TRUE	1	40		1.55694	0.923558	86.3401			N	N	N	N	N	N	N	N	N	N	N
384	P24	FALSE	Peel	FcARF16	UNKNOWN	SYBR	None				0.218461	0.114306	0.417522	30.2601	30.3015	0.478024		2.22463	0.336572	2.19455	TRUE	0.492056	TRUE	1	40		1.55364	0.957204	86.3401	78.3206		N	N	N	N	N	N	N	N	N	N	Y
											0.218461	0.114306	0.417522	30.7989	30.3015	0.478024		2.22463	0.336572	2.19455
Analysis Type	Singleplex										0.218461	0.114306	0.417522	29.8455	30.3015	0.478024		2.22463	0.336572	2.19455
Endogenous Control	FcARF15
RQ Min/Max Confidence Level	95.0
Reference Sample	Root

## Sheet: Melt Curve Raw Data
Block Type	384-Well Block
Calibration Background is expired	No
Calibration Background performed on	12-23-2020
Calibration Pure Dye FAM is expired	No
Calibration Pure Dye FAM performed on	12-23-2020
Calibration Pure Dye NED is expired	No
Calibration Pure Dye NED performed on	12-23-2020
Calibration Pure Dye ROX is expired	No
Calibration Pure Dye ROX performed on	12-23-2020
Calibration Pure Dye SYBR is expired	No
Calibration Pure Dye SYBR performed on	12-23-2020
Calibration Pure Dye TAMRA is expired	No
Calibration Pure Dye TAMRA performed on	12-23-2020
Calibration Pure Dye VIC is expired	No
Calibration Pure Dye VIC performed on	12-23-2020
Calibration RNaseP is expired	No
Calibration RNaseP performed on	11-03-2016
Calibration ROI is expired	No
Calibration ROI performed on	12-23-2020
Calibration Uniformity is expired	No
Calibration Uniformity performed on	12-23-2020
Chemistry	SYBR_GREEN
Date Created	2021-12-16 20:20:14 PM CST
Experiment Barcode
Experiment Comment
Experiment File Name	C:\Users\zgnyd\Documents\WeChat Files\wxid_3g6h1irk34e722\FileStorage\File\2022-04\2021-12-16 tissues.eds
Experiment Name	2021-12-16 202009
Experiment Run End Time	2010-01-05 03:43:04 AM CST
Experiment Type	Comparative Cт (ΔΔCт)
Instrument Name	278861484
Instrument Serial Number	278861484
Instrument Type	QuantStudio(TM) 6 Flex System
Passive Reference	ROX
Quantification Cycle Method	Ct
Signal Smoothing On	true
Stage/ Cycle where Analysis is performed	Stage 2, Step 2
User Name
Well	Well Position	Reading	Temperature	Fluorescence	Derivative
1	A1	1	60.1782	4.1086	0.563357
1	A1	2	60.4411	4.61081	0.703001
1	A1	3	60.7041	4.27598	0.925585
1	A1	4	60.967	4.7306	1.18098
1	A1	5	61.2299	3.83907	1.39457
1	A1	6	61.4929	4.32479	1.4915
1	A1	7	61.7558	4.41699	1.42376
1	A1	8	62.0187	3.90099	1.19207
1	A1	9	62.2817	3.79462	0.853054
1	A1	10	62.5446	4.00709	0.502929
1	A1	11	62.8075	3.9973	0.239158
1	A1	12	63.0705	4.0584	0.118868
1	A1	13	63.3334	4.15831	0.139755
1	A1	14	63.5963	4.36797	0.254971
1	A1	15	63.8593	3.67973	0.407408
1	A1	16	64.1222	3.77841	0.556246
1	A1	17	64.3851	4.43113	0.681634
1	A1	18	64.6481	4.03847	0.775779
1	A1	19	64.911	3.76572	0.836473
1	A1	20	65.1739	3.77058	0.866775
1	A1	21	65.4369	4.03855	0.872417
1	A1	22	65.6998	3.74995	0.852491
1	A1	23	65.9627	4.15903	0.791355
1	A1	24	66.2257	3.52115	0.663029
1	A1	25	66.4886	3.68268	0.449603
1	A1	26	66.7515	3.94072	0.163928
1	A1	27	67.0145	3.55738	-0.136403
1	A1	28	67.2774	3.86022	-0.35481
1	A1	29	67.5403	3.46415	-0.386648
1	A1	30	67.8033	3.79641	-0.16831
1	A1	31	68.0662	4.42586	0.279644
1	A1	32	68.3291	3.8595	0.845466
1	A1	33	68.5921	3.93266	1.36678
1	A1	34	68.855	3.62317	1.69741
1	A1	35	69.1179	3.46915	1.76081
1	A1	36	69.3809	3.60704	1.56382
1	A1	37	69.6438	3.499	1.17474
1	A1	38	69.9067	3.4132	0.689745
1	A1	39	70.1697	3.24702	0.207188
1	A1	40	70.4326	3.63322	-0.186783
1	A1	41	70.6955	3.4213	-0.427786
1	A1	42	70.9585	3.61846	-0.483178
1	A1	43	71.2214	3.4637	-0.360524
1	A1	44	71.4843	3.85949	-0.108503
1	A1	45	71.7473	3.59242	0.194381
1	A1	46	72.0102	3.58898	0.462249
1	A1	47	72.2732	3.43421	0.62784
1	A1	48	72.5361	3.62477	0.662008
1	A1	49	72.799	3.24847	0.580297
1	A1	50	73.0619	3.5836	0.435893
1	A1	51	73.3249	3.33718	0.302309
1	A1	52	73.5878	3.37089	0.250267
1	A1	53	73.8507	3.50474	0.324868
1	A1	54	74.1137	3.66055	0.530956
1	A1	55	74.3766	3.41626	0.832853
1	A1	56	74.6395	3.39407	1.16704
1	A1	57	74.9025	3.38254	1.45985
1	A1	58	75.1654	3.24483	1.64324
1	A1	59	75.4283	3.34593	1.66895
1	A1	60	75.6913	3.14946	1.52325
1	A1	61	75.9542	2.88143	1.23689
1	A1	62	76.2172	2.7244	0.877514
1	A1	63	76.4801	3.24479	0.521468
1	A1	64	76.743	3.338	0.221843
1	A1	65	77.0059	2.92458	-0.0012733
1	A1	66	77.2689	3.02501	-0.141658
1	A1	67	77.5318	2.8506	-0.182546
1	A1	68	77.7948	3.16492	-0.0986587
1	A1	69	78.0577	3.2129	0.110562
1	A1	70	78.3206	3.408	0.388276
1	A1	71	78.5836	3.19341	0.626558
1	A1	72	78.8465	2.78963	0.71818
1	A1	73	79.1094	2.7366	0.619138
1	A1	74	79.3723	2.93267	0.375657
1	A1	75	79.6353	3.07688	0.0971052
1	A1	76	79.8982	2.90702	-0.10402
1	A1	77	80.1612	3.04567	-0.165068
1	A1	78	80.4241	3.11819	-0.0908083
1	A1	79	80.687	3.16504	0.0662462
1	A1	80	80.95	2.85706	0.244119
1	A1	81	81.2129	2.99182	0.404549
1	A1	82	81.4758	2.84099	0.545044
1	A1	83	81.7388	3.25248	0.687861
1	A1	84	82.0017	2.71778	0.855861
1	A1	85	82.2646	2.97938	1.04984
1	A1	86	82.5276	2.86517	1.23977
1	A1	87	82.7905	3.02855	1.3764
1	A1	88	83.0534	2.74605	1.42037
1	A1	89	83.3163	2.30078	1.37259
1	A1	90	83.5793	2.7198	1.28196
1	A1	91	83.8422	2.56938	1.21637
1	A1	92	84.1052	2.80594	1.21042
1	A1	93	84.3681	2.65644	1.22826
1	A1	94	84.631	2.74933	1.17532
1	A1	95	84.894	2.108	0.958408
1	A1	96	85.1569	2.07025	0.55508
1	A1	97	85.4198	2.54352	0.0454106
1	A1	98	85.6828	2.39168	-0.414414
1	A1	99	85.9457	2.4841	-0.660057
1	A1	100	86.2086	2.67984	-0.593281
1	A1	101	86.4716	2.55464	-0.231488
1	A1	102	86.7345	2.93277	0.286841
1	A1	103	86.9974	2.65131	0.749669
1	A1	104	87.2604	1.96593	0.963134
1	A1	105	87.5233	2.08316	0.849485
1	A1	106	87.7862	2.26146	0.493691
1	A1	107	88.0492	2.43613	0.101198
1	A1	108	88.3121	3.0204	-0.113077
1	A1	109	88.575	2.31068	-0.0350501
1	A1	110	88.838	2.44674	0.304247
1	A1	111	89.1009	2.43677	0.763344
1	A1	112	89.3638	2.44483	1.16634
1	A1	113	89.6268	2.26042	1.37423
1	A1	114	89.8897	2.00808	1.32928
1	A1	115	90.1526	1.92556	1.0693
1	A1	116	90.4156	2.15875	0.710341
1	A1	117	90.6785	2.3997	0.397417
1	A1	118	90.9414	2.28252	0.239774
1	A1	119	91.2044	2.23265	0.265549
1	A1	120	91.4673	2.1955	0.424277
1	A1	121	91.7302	2.1499	0.632455
1	A1	122	91.9932	1.7709	0.825681
1	A1	123	92.2561	2.40555	0.979926
1	A1	124	92.519	2.11583	1.09538
1	A1	125	92.782	1.95544	1.16904
1	A1	126	93.0449	1.85104	1.1866
1	A1	127	93.3078	1.71903	1.13872
1	A1	128	93.5708	2.06687	1.03885
1	A1	129	93.8337	1.77416	0.919627
1	A1	130	94.0966	1.98006	0.809471
1	A1	131	94.3596	1.79235	0.712588
1	A1	132	94.6225	1.67819	0.611583
1	A1	133	94.8854	1.72064	0.488698
2	A2	1	60.1782	5.13047	0.238483
2	A2	2	60.4411	5.13519	0.235401
2	A2	3	60.7041	5.0915	0.233099
2	A2	4	60.967	5.0744	0.232471
2	A2	5	61.2299	5.05951	0.233838
2	A2	6	61.4929	5.02664	0.236739
2	A2	7	61.7558	4.98762	0.240203
2	A2	8	62.0187	4.96595	0.243341
2	A2	9	62.2817	4.91152	0.245811
2	A2	10	62.5446	4.89608	0.247876
2	A2	11	62.8075	4.8739	0.25
2	A2	12	63.0705	4.83269	0.252356
2	A2	13	63.3334	4.80063	0.254585
2	A2	14	63.5963	4.78408	0.256019
2	A2	15	63.8593	4.72572	0.256172
2	A2	16	64.1222	4.69581	0.255113
2	A2	17	64.3851	4.66274	0.253513
2	A2	18	64.6481	4.64617	0.252307
2	A2	19	64.911	4.61518	0.25224
2	A2	20	65.1739	4.56472	0.253605
2	A2	21	65.4369	4.55452	0.256223
2	A2	22	65.6998	4.5142	0.259604
2	A2	23	65.9627	4.47608	0.263151
2	A2	24	66.2257	4.45538	0.266319
2	A2	25	66.4886	4.40238	0.268727
2	A2	26	66.7515	4.38775	0.270225
2	A2	27	67.0145	4.33425	0.270891
2	A2	28	67.2774	4.31485	0.270965
2	A2	29	67.5403	4.27138	0.270744
2	A2	30	67.8033	4.24414	0.270475
2	A2	31	68.0662	4.20991	0.270292
2	A2	32	68.3291	4.16641	0.270199
2	A2	33	68.5921	4.14322	0.270072
2	A2	34	68.855	4.11214	0.269732
2	A2	35	69.1179	4.07072	0.269019
2	A2	36	69.3809	4.02287	0.2679
2	A2	37	69.6438	4.01382	0.266501
2	A2	38	69.9067	3.96548	0.265077
2	A2	39	70.1697	3.93037	0.26393
2	A2	40	70.4326	3.90579	0.263312
2	A2	41	70.6955	3.8641	0.263327
2	A2	42	70.9585	3.83909	0.263852
2	A2	43	71.2214	3.80724	0.26453
2	A2	44	71.4843	3.76785	0.264913
2	A2	45	71.7473	3.73517	0.264703
2	A2	46	72.0102	3.69678	0.263949
2	A2	47	72.2732	3.66309	0.263052
2	A2	48	72.5361	3.63554	0.262542
2	A2	49	72.799	3.61099	0.262778
2	A2	50	73.0619	3.56455	0.263771
2	A2	51	73.3249	3.53576	0.26521
2	A2	52	73.5878	3.50469	0.266657
2	A2	53	73.8507	3.46556	0.267732
2	A2	54	74.1137	3.43467	0.268216
2	A2	55	74.3766	3.39556	0.268029
2	A2	56	74.6395	3.36959	0.267194
2	A2	57	74.9025	3.32839	0.265817
2	A2	58	75.1654	3.29733	0.264105
2	A2	59	75.4283	3.25608	0.262376
2	A2	60	75.6913	3.23544	0.26099
2	A2	61	75.9542	3.198	0.260247
2	A2	62	76.2172	3.16457	0.260268
2	A2	63	76.4801	3.1338	0.260967
2	A2	64	76.743	3.1007	0.262096
2	A2	65	77.0059	3.06494	0.263333
2	A2	66	77.2689	3.0352	0.26436
2	A2	67	77.5318	2.99763	0.264934
2	A2	68	77.7948	2.96259	0.264958
2	A2	69	78.0577	2.93324	0.264528
2	A2	70	78.3206	2.89289	0.263958
2	A2	71	78.5836	2.86426	0.263742
2	A2	72	78.8465	2.83011	0.26446
2	A2	73	79.1094	2.80674	0.266666
2	A2	74	79.3723	2.7592	0.270769
2	A2	75	79.6353	2.73197	0.276902
2	A2	76	79.8982	2.7034	0.284792
2	A2	77	80.1612	2.6682	0.293736
2	A2	78	80.4241	2.62615	0.302858
2	A2	79	80.687	2.58415	0.311778
2	A2	80	80.95	2.53462	0.321641
2	A2	81	81.2129	2.49586	0.336265
2	A2	82	81.4758	2.45442	0.363027
2	A2	83	81.7388	2.42026	0.413079
2	A2	84	82.0017	2.38623	0.500405
2	A2	85	82.2646	2.34713	0.639132
2	A2	86	82.5276	2.30042	0.83871
2	A2	87	82.7905	2.21552	1.09734
2	A2	88	83.0534	2.10692	1.39571
2	A2	89	83.3163	1.92267	1.69463
2	A2	90	83.5793	1.60847	1.94028
2	A2	91	83.8422	1.11804	2.07796
2	A2	92	84.1052	0.604249	2.07027
2	A2	93	84.3681	0.212629	1.91175
2	A2	94	84.631	0.0234017	1.63212
2	A2	95	84.894	-0.0259394	1.28612
2	A2	96	85.1569	-0.0361849	0.934626
2	A2	97	85.4198	-0.0401623	0.626355
2	A2	98	85.6828	-0.0426385	0.387621
2	A2	99	85.9457	-0.0448505	0.222368
2	A2	100	86.2086	-0.0445218	0.119325
2	A2	101	86.4716	-0.0454356	0.0610603
2	A2	102	86.7345	-0.0479482	0.0309194
2	A2	103	86.9974	-0.0508933	0.0164215
2	A2	104	87.2604	-0.0487472	0.00975196
2	A2	105	87.5233	-0.0507788	0.00673362
2	A2	106	87.7862	-0.0497468	0.00544686
2	A2	107	88.0492	-0.050224	0.00511275
2	A2	108	88.3121	-0.0520687	0.00539934
2	A2	109	88.575	-0.0525673	0.00607767
2	A2	110	88.838	-0.0500044	0.00690001
2	A2	111	89.1009	-0.0566624	0.00760373
2	A2	112	89.3638	-0.0569308	0.00797839
2	A2	113	89.6268	-0.0581182	0.00793998
2	A2	114	89.8897	-0.0579446	0.0075563
2	A2	115	90.1526	-0.056725	0.00699838
2	A2	116	90.4156	-0.0611514	0.00644805
2	A2	117	90.6785	-0.0586543	0.00602355
2	A2	118	90.9414	-0.0616678	0.0057634
2	A2	119	91.2044	-0.0609543	0.00565626
2	A2	120	91.4673	-0.0615549	0.00567374
2	A2	121	91.7302	-0.064018	0.00577629
2	A2	122	91.9932	-0.0615763	0.0058999
2	A2	123	92.2561	-0.0639196	0.00595628
2	A2	124	92.519	-0.0674371	0.00586744
2	A2	125	92.782	-0.0661389	0.00561762
2	A2	126	93.0449	-0.0672246	0.00527587
2	A2	127	93.3078	-0.0653306	0.00495596
2	A2	128	93.5708	-0.0665259	0.0047334
2	A2	129	93.8337	-0.0692598	0.00458286
2	A2	130	94.0966	-0.0686104	0.00438803
2	A2	131	94.3596	-0.0701959	0.00401808
2	A2	132	94.6225	-0.069291	0.00341366
2	A2	133	94.8854	-0.0717307	0.00262435
3	A3	1	60.1782	1.45279	-0.00295223
3	A3	2	60.4411	1.44651	-0.00747264
3	A3	3	60.7041	1.46877	-0.0123733
3	A3	4	60.967	1.46401	-0.0164019
3	A3	5	61.2299	1.45955	-0.0185507
3	A3	6	61.4929	1.47645	-0.018462
3	A3	7	61.7558	1.49631	-0.0164955
3	A3	8	62.0187	1.47695	-0.013422
3	A3	9	62.2817	1.46543	-0.00995276
3	A3	10	62.5446	1.48422	-0.00641896
3	A3	11	62.8075	1.49164	-0.00275813
3	A3	12	63.0705	1.47262	0.00127533
3	A3	13	63.3334	1.49024	0.0058868
3	A3	14	63.5963	1.48592	0.0111299
3	A3	15	63.8593	1.46541	0.0168812
3	A3	16	64.1222	1.48735	0.0228337
3	A3	17	64.3851	1.48311	0.028512
3	A3	18	64.6481	1.46183	0.0333853
3	A3	19	64.911	1.46491	0.0370749
3	A3	20	65.1739	1.45573	0.0395618
3	A3	21	65.4369	1.44676	0.0412478
3	A3	22	65.6998	1.44523	0.042815
3	A3	23	65.9627	1.44504	0.0449507
3	A3	24	66.2257	1.42377	0.0480815
3	A3	25	66.4886	1.44122	0.0522416
3	A3	26	66.7515	1.42427	0.0571083
3	A3	27	67.0145	1.40505	0.0621628
3	A3	28	67.2774	1.4046	0.0668646
3	A3	29	67.5403	1.39951	0.0707759
3	A3	30	67.8033	1.38317	0.0736264
3	A3	31	68.0662	1.36636	0.0753532
3	A3	32	68.3291	1.36466	0.0761339
3	A3	33	68.5921	1.34849	0.0763628
3	A3	34	68.855	1.33922	0.0765472
3	A3	35	69.1179	1.32291	0.0771321
3	A3	36	69.3809	1.33066	0.0783612
3	A3	37	69.6438	1.30999	0.0802507
3	A3	38	69.9067	1.29628	0.0826685
3	A3	39	70.1697	1.27612	0.0854174
3	A3	40	70.4326	1.28156	0.0882454
3	A3	41	70.6955	1.26975	0.0908268
3	A3	42	70.9585	1.24975	0.0928258
3	A3	43	71.2214	1.22312	0.0940781
3	A3	44	71.4843	1.23008	0.0947467
3	A3	45	71.7473	1.1989	0.0952943
3	A3	46	72.0102	1.19763	0.0962374
3	A3	47	72.2732	1.18898	0.0978501
3	A3	48	72.5361	1.17468	0.100029
3	A3	49	72.799	1.15374	0.102391
3	A3	50	73.0619	1.13154	0.104476
3	A3	51	73.3249	1.13564	0.105916
3	A3	52	73.5878	1.10998	0.10648
3	A3	53	73.8507	1.09623	0.106095
3	A3	54	74.1137	1.07618	0.104882
3	A3	55	74.3766	1.06932	0.103197
3	A3	56	74.6395	1.04634	0.10158
3	A3	57	74.9025	1.0386	0.100558
3	A3	58	75.1654	1.02793	0.100408
3	A3	59	75.4283	1.02237	0.10107
3	A3	60	75.6913	0.996296	0.102274
3	A3	61	75.9542	0.977241	0.103815
3	A3	62	76.2172	0.964707	0.105684
3	A3	63	76.4801	0.960069	0.107944
3	A3	64	76.743	0.943967	0.110444
3	A3	65	77.0059	0.93605	0.112706
3	A3	66	77.2689	0.906141	0.114147
3	A3	67	77.5318	0.873799	0.114497
3	A3	68	77.7948	0.87415	0.114078
3	A3	69	78.0577	0.869472	0.113715
3	A3	70	78.3206	0.846299	0.114437
3	A3	71	78.5836	0.825383	0.117302
3	A3	72	78.8465	0.816786	0.12359
3	A3	73	79.1094	0.804158	0.135275
3	A3	74	79.3723	0.779312	0.155417
3	A3	75	79.6353	0.759035	0.188019
3	A3	76	79.8982	0.75108	0.237014
3	A3	77	80.1612	0.73197	0.304426
3	A3	78	80.4241	0.70874	0.388289
3	A3	79	80.687	0.654359	0.48127
3	A3	80	80.95	0.563292	0.570947
3	A3	81	81.2129	0.432018	0.642107
3	A3	82	81.4758	0.296402	0.680569
3	A3	83	81.7388	0.154864	0.677286
3	A3	84	82.0017	0.0182007	0.631224
3	A3	85	82.2646	-0.0757002	0.549881
3	A3	86	82.5276	-0.131018	0.447157
3	A3	87	82.7905	-0.133916	0.339339
3	A3	88	83.0534	-0.143838	0.240742
3	A3	89	83.3163	-0.140935	0.160613
3	A3	90	83.5793	-0.146602	0.102222
3	A3	91	83.8422	-0.153306	0.0639512
3	A3	92	84.1052	-0.146579	0.0414265
3	A3	93	84.3681	-0.153673	0.0295842
3	A3	94	84.631	-0.156112	0.0240323
3	A3	95	84.894	-0.15534	0.021616
3	A3	96	85.1569	-0.172585	0.0204222
3	A3	97	85.4198	-0.160035	0.0195022
3	A3	98	85.6828	-0.170757	0.0185077
3	A3	99	85.9457	-0.165229	0.0173738
3	A3	100	86.2086	-0.177911	0.0161297
3	A3	101	86.4716	-0.170744	0.0148455
3	A3	102	86.7345	-0.180717	0.0136377
3	A3	103	86.9974	-0.179812	0.0126278
3	A3	104	87.2604	-0.173944	0.0118329
3	A3	105	87.5233	-0.180175	0.0110844
3	A3	106	87.7862	-0.18623	0.0101066
3	A3	107	88.0492	-0.188656	0.00876452
3	A3	108	88.3121	-0.191986	0.00730763
3	A3	109	88.575	-0.178925	0.00637419
3	A3	110	88.838	-0.184236	0.00667337
3	A3	111	89.1009	-0.180436	0.00852191
3	A3	112	89.3638	-0.187676	0.0115553
3	A3	113	89.6268	-0.185168	0.0148368
3	A3	114	89.8897	-0.205262	0.0173153
3	A3	115	90.1526	-0.199775	0.0183427
3	A3	116	90.4156	-0.20554	0.0179228
3	A3	117	90.6785	-0.192859	0.0165642
3	A3	118	90.9414	-0.204775	0.0148943
3	A3	119	91.2044	-0.208703	0.0133316
3	A3	120	91.4673	-0.211082	0.0120093
3	A3	121	91.7302	-0.201988	0.0109035
3	A3	122	91.9932	-0.215216	0.00998311
3	A3	123	92.2561	-0.207003	0.00925857
3	A3	124	92.519	-0.212916	0.00875145
3	A3	125	92.782	-0.211419	0.00846942
3	A3	126	93.0449	-0.219023	0.00841385
3	A3	127	93.3078	-0.212674	0.00857148
3	A3	128	93.5708	-0.213861	0.00885349
3	A3	129	93.8337	-0.21529	0.00903356
3	A3	130	94.0966	-0.220728	0.00878635
3	A3	131	94.3596	-0.227835	0.0078567
3	A3	132	94.6225	-0.225496	0.00625021
3	A3	133	94.8854	-0.215348	0.00428008
4	A4	1	60.1782	5.24825	0.295567
4	A4	2	60.4411	5.22421	0.293788
4	A4	3	60.7041	5.19112	0.291129
4	A4	4	60.967	5.16249	0.288592
4	A4	5	61.2299	5.13771	0.287517
4	A4	6	61.4929	5.1292	0.288911
4	A4	7	61.7558	5.10015	0.29287
4	A4	8	62.0187	5.0515	0.29849
4	A4	9	62.2817	5.03416	0.304209
4	A4	10	62.5446	5.00785	0.308424
4	A4	11	62.8075	4.98972	0.310083
4	A4	12	63.0705	4.90991	0.309071
4	A4	13	63.3334	4.91341	0.306184
4	A4	14	63.5963	4.87881	0.302743
4	A4	15	63.8593	4.85625	0.300037
4	A4	16	64.1222	4.82349	0.298932
4	A4	17	64.3851	4.78956	0.299803
4	A4	18	64.6481	4.76695	0.302639
4	A4	19	64.911	4.73625	0.307103
4	A4	20	65.1739	4.70773	0.312535
4	A4	21	65.4369	4.68988	0.31805
4	A4	22	65.6998	4.64441	0.322823
4	A4	23	65.9627	4.60115	0.326394
4	A4	24	66.2257	4.57521	0.328726
4	A4	25	66.4886	4.55386	0.329963
4	A4	26	66.7515	4.5356	0.330202
4	A4	27	67.0145	4.47033	0.329498
4	A4	28	67.2774	4.44748	0.328104
4	A4	29	67.5403	4.41289	0.326598
4	A4	30	67.8033	4.40011	0.325664
4	A4	31	68.0662	4.36093	0.325743
4	A4	32	68.3291	4.32399	0.326819
4	A4	33	68.5921	4.29953	0.32856
4	A4	34	68.855	4.26147	0.330588
4	A4	35	69.1179	4.23072	0.332671
4	A4	36	69.3809	4.20062	0.334701
4	A4	37	69.6438	4.16611	0.336553
4	A4	38	69.9067	4.13225	0.338034
4	A4	39	70.1697	4.09986	0.338938
4	A4	40	70.4326	4.06453	0.339158
4	A4	41	70.6955	4.02612	0.338723
4	A4	42	70.9585	4.00283	0.337737
4	A4	43	71.2214	3.96756	0.336252
4	A4	44	71.4843	3.93532	0.334265
4	A4	45	71.7473	3.89817	0.33182
4	A4	46	72.0102	3.86629	0.329142
4	A4	47	72.2732	3.83293	0.326661
4	A4	48	72.5361	3.81081	0.324911
4	A4	49	72.799	3.77677	0.324369
4	A4	50	73.0619	3.73981	0.325319
4	A4	51	73.3249	3.70811	0.32778
4	A4	52	73.5878	3.68849	0.331398
4	A4	53	73.8507	3.64858	0.335428
4	A4	54	74.1137	3.62082	0.338869
4	A4	55	74.3766	3.57766	0.34081
4	A4	56	74.6395	3.54106	0.340818
4	A4	57	74.9025	3.51427	0.33916
4	A4	58	75.1654	3.47382	0.336699
4	A4	59	75.4283	3.44983	0.334519
4	A4	60	75.6913	3.41686	0.333517
4	A4	61	75.9542	3.37762	0.334087
4	A4	62	76.2172	3.3592	0.335994
4	A4	63	76.4801	3.31515	0.338441
4	A4	64	76.743	3.28868	0.340337
4	A4	65	77.0059	3.25504	0.340739
4	A4	66	77.2689	3.20752	0.339358
4	A4	67	77.5318	3.17491	0.33684
4	A4	68	77.7948	3.15532	0.334704
4	A4	69	78.0577	3.11714	0.334913
4	A4	70	78.3206	3.08773	0.339433
4	A4	71	78.5836	3.06697	0.350128
4	A4	72	78.8465	3.02758	0.369154
4	A4	73	79.1094	2.98158	0.399628
4	A4	74	79.3723	2.95323	0.446082
4	A4	75	79.6353	2.92142	0.51427
4	A4	76	79.8982	2.88306	0.610239
4	A4	77	80.1612	2.82682	0.738948
4	A4	78	80.4241	2.76373	0.902783
4	A4	79	80.687	2.68046	1.10007
4	A4	80	80.95	2.55386	1.32355
4	A4	81	81.2129	2.4051	1.55891
4	A4	82	81.4758	2.24271	1.78417
4	A4	83	81.7388	2.04139	1.9716
4	A4	84	82.0017	1.7601	2.09307
4	A4	85	82.2646	1.45732	2.12818
4	A4	86	82.5276	1.15089	2.072
4	A4	87	82.7905	0.931826	1.9381
4	A4	88	83.0534	0.830829	1.75468
4	A4	89	83.3163	0.731977	1.5552
4	A4	90	83.5793	0.605234	1.36804
4	A4	91	83.8422	0.485813	1.2096
4	A4	92	84.1052	0.416103	1.08263
4	A4	93	84.3681	0.34746	0.978984
4	A4	94	84.631	0.257127	0.884807
4	A4	95	84.894	0.138091	0.786465
4	A4	96	85.1569	0.0237492	0.675763
4	A4	97	85.4198	-0.0289652	0.552841
4	A4	98	85.6828	-0.0338094	0.425583
4	A4	99	85.9457	-0.0358411	0.305808
4	A4	100	86.2086	-0.0369912	0.204258
4	A4	101	86.4716	-0.0360164	0.126875
4	A4	102	86.7345	-0.0387569	0.0738475
4	A4	103	86.9974	-0.0401427	0.0411048
4	A4	104	87.2604	-0.0390286	0.0228204
4	A4	105	87.5233	-0.0409862	0.0135251
4	A4	106	87.7862	-0.0420443	0.00917878
4	A4	107	88.0492	-0.0419342	0.00730732
4	A4	108	88.3121	-0.0423692	0.00663648
4	A4	109	88.575	-0.0418529	0.00661117
4	A4	110	88.838	-0.0447108	0.00700667
4	A4	111	89.1009	-0.043101	0.00768694
4	A4	112	89.3638	-0.0457571	0.0084917
4	A4	113	89.6268	-0.0451595	0.00921805
4	A4	114	89.8897	-0.047814	0.00966442
4	A4	115	90.1526	-0.0509351	0.00970067
4	A4	116	90.4156	-0.0494708	0.00931913
4	A4	117	90.6785	-0.0492322	0.00863237
4	A4	118	90.9414	-0.0508995	0.0078223
4	A4	119	91.2044	-0.0520145	0.00707927
4	A4	120	91.4673	-0.0532811	0.00656169
4	A4	121	91.7302	-0.0520675	0.00636997
4	A4	122	91.9932	-0.0502046	0.00651622
4	A4	123	92.2561	-0.0543872	0.006902
4	A4	124	92.519	-0.0551867	0.00734199
4	A4	125	92.782	-0.0568723	0.00764382
4	A4	126	93.0449	-0.0556762	0.00769642
4	A4	127	93.3078	-0.0563148	0.0075011
4	A4	128	93.5708	-0.0584601	0.00712674
4	A4	129	93.8337	-0.0584117	0.00663279
4	A4	130	94.0966	-0.0585026	0.00602218
4	A4	131	94.3596	-0.0584275	0.00525401
4	A4	132	94.6225	-0.0621865	0.00429994
4	A4	133	94.8854	-0.0609197	0.00320017
5	A5	1	60.1782	3.76979	0.187393
5	A5	2	60.4411	3.74479	0.185375
5	A5	3	60.7041	3.72309	0.181786
5	A5	4	60.967	3.70291	0.177367
5	A5	5	61.2299	3.69202	0.173435
5	A5	6	61.4929	3.66405	0.171373
5	A5	7	61.7558	3.65484	0.172051
5	A5	8	62.0187	3.64654	0.175465
5	A5	9	62.2817	3.61001	0.180761
5	A5	10	62.5446	3.60524	0.186627
5	A5	11	62.8075	3.5666	0.191809
5	A5	12	63.0705	3.54947	0.195544
5	A5	13	63.3334	3.53402	0.197684
5	A5	14	63.5963	3.48763	0.198534
5	A5	15	63.8593	3.48107	0.198536
5	A5	16	64.1222	3.4749	0.198038
5	A5	17	64.3851	3.42984	0.197305
5	A5	18	64.6481	3.40212	0.196669
5	A5	19	64.911	3.39017	0.196638
5	A5	20	65.1739	3.37251	0.19777
5	A5	21	65.4369	3.35189	0.200412
5	A5	22	65.6998	3.32548	0.204498
5	A5	23	65.9627	3.30299	0.209545
5	A5	24	66.2257	3.27634	0.2148
5	A5	25	66.4886	3.25447	0.219425
5	A5	26	66.7515	3.23491	0.222706
5	A5	27	67.0145	3.1974	0.224284
5	A5	28	67.2774	3.17418	0.224341
5	A5	29	67.5403	3.13679	0.223616
5	A5	30	67.8033	3.12999	0.223137
5	A5	31	68.0662	3.10232	0.2238
5	A5	32	68.3291	3.07546	0.226013
5	A5	33	68.5921	3.05416	0.229597
5	A5	34	68.855	3.0236	0.233928
5	A5	35	69.1179	2.99471	0.238218
5	A5	36	69.3809	2.97775	0.241783
5	A5	37	69.6438	2.93419	0.244277
5	A5	38	69.9067	2.9114	0.245829
5	A5	39	70.1697	2.87967	0.24702
5	A5	40	70.4326	2.84883	0.248654
5	A5	41	70.6955	2.83482	0.251396
5	A5	42	70.9585	2.80081	0.255449
5	A5	43	71.2214	2.7732	0.260465
5	A5	44	71.4843	2.73842	0.265745
5	A5	45	71.7473	2.71131	0.270597
5	A5	46	72.0102	2.67777	0.274694
5	A5	47	72.2732	2.6429	0.278237
5	A5	48	72.5361	2.60747	0.281877
5	A5	49	72.799	2.58571	0.2864
5	A5	50	73.0619	2.54979	0.292357
5	A5	51	73.3249	2.52139	0.299802
5	A5	52	73.5878	2.48194	0.308304
5	A5	53	73.8507	2.44804	0.317198
5	A5	54	74.1137	2.40768	0.325914
5	A5	55	74.3766	2.37077	0.33424
5	A5	56	74.6395	2.32797	0.342397
5	A5	57	74.9025	2.29771	0.350951
5	A5	58	75.1654	2.24835	0.360592
5	A5	59	75.4283	2.20724	0.371813
5	A5	60	75.6913	2.16862	0.384477
5	A5	61	75.9542	2.12844	0.397436
5	A5	62	76.2172	2.08339	0.408401
5	A5	63	76.4801	2.02592	0.414344
5	A5	64	76.743	1.97089	0.412422
5	A5	65	77.0059	1.91132	0.401098
5	A5	66	77.2689	1.85826	0.380912
5	A5	67	77.5318	1.81943	0.354493
5	A5	68	77.7948	1.78859	0.32578
5	A5	69	78.0577	1.76029	0.298828
5	A5	70	78.3206	1.73307	0.276793
5	A5	71	78.5836	1.71085	0.261487
5	A5	72	78.8465	1.68104	0.25365
5	A5	73	79.1094	1.65824	0.25372
5	A5	74	79.3723	1.62445	0.262846
5	A5	75	79.6353	1.60264	0.283841
5	A5	76	79.8982	1.57849	0.321852
5	A5	77	80.1612	1.54355	0.384434
5	A5	78	80.4241	1.51073	0.480499
5	A5	79	80.687	1.47051	0.617509
5	A5	80	80.95	1.42292	0.796743
5	A5	81	81.2129	1.35561	1.00776
5	A5	82	81.4758	1.23741	1.22487
5	A5	83	81.7388	1.06956	1.40906
5	A5	84	82.0017	0.804342	1.51743
5	A5	85	82.2646	0.400654	1.51779
5	A5	86	82.5276	0.0544228	1.40215
5	A5	87	82.7905	-0.0262708	1.19147
5	A5	88	83.0534	-0.0342683	0.928592
5	A5	89	83.3163	-0.0351047	0.662477
5	A5	90	83.5793	-0.0351378	0.432231
5	A5	91	83.8422	-0.0382098	0.258056
5	A5	92	84.1052	-0.0358078	0.141502
5	A5	93	84.3681	-0.0383931	0.0720503
5	A5	94	84.631	-0.0386833	0.0350523
5	A5	95	84.894	-0.0391056	0.0173762
5	A5	96	85.1569	-0.0413627	0.0097586
5	A5	97	85.4198	-0.0390976	0.00673269
5	A5	98	85.6828	-0.0419725	0.00551962
5	A5	99	85.9457	-0.041033	0.00487965
5	A5	100	86.2086	-0.042736	0.00433144
5	A5	101	86.4716	-0.0446293	0.00374658
5	A5	102	86.7345	-0.041141	0.00317312
5	A5	103	86.9974	-0.0452194	0.00274492
5	A5	104	87.2604	-0.0428526	0.0025988
5	A5	105	87.5233	-0.0417435	0.00279102
5	A5	106	87.7862	-0.0438077	0.00324839
5	A5	107	88.0492	-0.0455061	0.00378992
5	A5	108	88.3121	-0.0457796	0.00421553
5	A5	109	88.575	-0.0465019	0.00440994
5	A5	110	88.838	-0.0467758	0.00439765
5	A5	111	89.1009	-0.0457485	0.00431844
5	A5	112	89.3638	-0.0489033	0.00434405
5	A5	113	89.6268	-0.0461195	0.00458342
5	A5	114	89.8897	-0.0482096	0.00501918
5	A5	115	90.1526	-0.0482413	0.00549974
5	A5	116	90.4156	-0.0504491	0.00579428
5	A5	117	90.6785	-0.0512587	0.00569755
5	A5	118	90.9414	-0.0521032	0.00514187
5	A5	119	91.2044	-0.0545492	0.00425309
5	A5	120	91.4673	-0.0504491	0.00330403
5	A5	121	91.7302	-0.0502532	0.00258013
5	A5	122	91.9932	-0.0517671	0.00223809
5	A5	123	92.2561	-0.0523723	0.00225022
5	A5	124	92.519	-0.0534628	0.00246407
5	A5	125	92.782	-0.0542388	0.00271806
5	A5	126	93.0449	-0.0517729	0.00291878
5	A5	127	93.3078	-0.0539926	0.00303511
5	A5	128	93.5708	-0.0533226	0.00304548
5	A5	129	93.8337	-0.0554993	0.00290892
5	A5	130	94.0966	-0.0560956	0.00259098
5	A5	131	94.3596	-0.0549887	0.00211106
5	A5	132	94.6225	-0.0551838	0.00155605
5	A5	133	94.8854	-0.0543008	0.00104127
6	A6	1	60.1782	4.4409	0.434662
6	A6	2	60.4411	4.43194	0.431151
6	A6	3	60.7041	4.42767	0.428875
6	A6	4	60.967	4.37846	0.428451
6	A6	5	61.2299	4.39037	0.42964
6	A6	6	61.4929	4.34315	0.431541
6	A6	7	61.7558	4.32596	0.433209
6	A6	8	62.0187	4.28357	0.434273
6	A6	9	62.2817	4.2802	0.435126
6	A6	10	62.5446	4.24887	0.436654
6	A6	11	62.8075	4.23478	0.439806
6	A6	12	63.0705	4.18659	0.445315
6	A6	13	63.3334	4.18848	0.453487
6	A6	14	63.5963	4.14483	0.46404
6	A6	15	63.8593	4.13014	0.475953
6	A6	16	64.1222	4.10686	0.487583
6	A6	17	64.3851	4.06875	0.497246
6	A6	18	64.6481	4.03498	0.503973
6	A6	19	64.911	4.01092	0.507964
6	A6	20	65.1739	3.98044	0.51044
6	A6	21	65.4369	3.95599	0.512894
6	A6	22	65.6998	3.92687	0.51638
6	A6	23	65.9627	3.90549	0.521226
6	A6	24	66.2257	3.864	0.527276
6	A6	25	66.4886	3.83884	0.534288
6	A6	26	66.7515	3.80461	0.542122
6	A6	27	67.0145	3.78586	0.550612
6	A6	28	67.2774	3.75046	0.559431
6	A6	29	67.5403	3.71917	0.568206
6	A6	30	67.8033	3.67891	0.576793
6	A6	31	68.0662	3.65213	0.585419
6	A6	32	68.3291	3.61632	0.594441
6	A6	33	68.5921	3.59089	0.603909
6	A6	34	68.855	3.56566	0.613324
6	A6	35	69.1179	3.50288	0.621821
6	A6	36	69.3809	3.47937	0.628627
6	A6	37	69.6438	3.45329	0.633486
6	A6	38	69.9067	3.40492	0.636823
6	A6	39	70.1697	3.36561	0.639676
6	A6	40	70.4326	3.33473	0.643441
6	A6	41	70.6955	3.30436	0.649524
6	A6	42	70.9585	3.26327	0.659
6	A6	43	71.2214	3.23022	0.672493
6	A6	44	71.4843	3.19391	0.690424
6	A6	45	71.7473	3.14965	0.713467
6	A6	46	72.0102	3.11451	0.74291
6	A6	47	72.2732	3.06507	0.780525
6	A6	48	72.5361	3.03243	0.82789
6	A6	49	72.799	2.98926	0.885476
6	A6	50	73.0619	2.93495	0.95204
6	A6	51	73.3249	2.8859	1.02473
6	A6	52	73.5878	2.81655	1.09978
6	A6	53	73.8507	2.74617	1.17343
6	A6	54	74.1137	2.68297	1.24233
6	A6	55	74.3766	2.6103	1.30352
6	A6	56	74.6395	2.52899	1.35408
6	A6	57	74.9025	2.44097	1.39094
6	A6	58	75.1654	2.35939	1.41093
6	A6	59	75.4283	2.2759	1.41127
6	A6	60	75.6913	2.1865	1.39008
6	A6	61	75.9542	2.10228	1.34707
6	A6	62	76.2172	2.02249	1.28393
6	A6	63	76.4801	1.9539	1.2045
6	A6	64	76.743	1.88532	1.11435
6	A6	65	77.0059	1.83226	1.02004
6	A6	66	77.2689	1.7845	0.928172
6	A6	67	77.5318	1.73669	0.844602
6	A6	68	77.7948	1.69972	0.773906
6	A6	69	78.0577	1.6628	0.719055
6	A6	70	78.3206	1.6346	0.681184
6	A6	71	78.5836	1.59722	0.659419
6	A6	72	78.8465	1.56992	0.65091
6	A6	73	79.1094	1.53329	0.651237
6	A6	74	79.3723	1.49237	0.65526
6	A6	75	79.6353	1.44892	0.658269
6	A6	76	79.8982	1.41697	0.65709
6	A6	77	80.1612	1.37601	0.650959
6	A6	78	80.4241	1.33858	0.641987
6	A6	79	80.687	1.29612	0.635162
6	A6	80	80.95	1.27512	0.637846
6	A6	81	81.2129	1.24066	0.658643
6	A6	82	81.4758	1.21246	0.705706
6	A6	83	81.7388	1.18097	0.784649
6	A6	84	82.0017	1.14669	0.896526
6	A6	85	82.2646	1.09618	1.03656
6	A6	86	82.5276	1.03745	1.19438
6	A6	87	82.7905	0.957159	1.35616
6	A6	88	83.0534	0.847705	1.50781
6	A6	89	83.3163	0.727651	1.63766
6	A6	90	83.5793	0.626193	1.7365
6	A6	91	83.8422	0.5447	1.79528
6	A6	92	84.1052	0.445389	1.80247
6	A6	93	84.3681	0.322157	1.74503
6	A6	94	84.631	0.162271	1.61396
6	A6	95	84.894	0.00621137	1.41206
6	A6	96	85.1569	-0.0245713	1.15816
6	A6	97	85.4198	-0.0308238	0.884042
6	A6	98	85.6828	-0.0337264	0.624719
6	A6	99	85.9457	-0.033252	0.407536
6	A6	100	86.2086	-0.0357621	0.245568
6	A6	101	86.4716	-0.0338961	0.13769
6	A6	102	86.7345	-0.0351606	0.0735253
6	A6	103	86.9974	-0.0358681	0.0395828
6	A6	104	87.2604	-0.0367022	0.023744
6	A6	105	87.5233	-0.0372544	0.0172168
6	A6	106	87.7862	-0.0393963	0.0146037
6	A6	107	88.0492	-0.0401855	0.013128
6	A6	108	88.3121	-0.0421297	0.0117366
6	A6	109	88.575	-0.0398118	0.0103419
6	A6	110	88.838	-0.0403808	0.0092235
6	A6	111	89.1009	-0.0396807	0.00860579
6	A6	112	89.3638	-0.0429495	0.00846232
6	A6	113	89.6268	-0.042349	0.0085599
6	A6	114	89.8897	-0.0436041	0.00864225
6	A6	115	90.1526	-0.0432387	0.00858883
6	A6	116	90.4156	-0.043119	0.00843394
6	A6	117	90.6785	-0.0450735	0.00825764
6	A6	118	90.9414	-0.0436257	0.00805866
6	A6	119	91.2044	-0.0440433	0.00772291
6	A6	120	91.4673	-0.0484802	0.00711957
6	A6	121	91.7302	-0.0456913	0.00625305
6	A6	122	91.9932	-0.0464773	0.0053466
6	A6	123	92.2561	-0.0450991	0.00477096
6	A6	124	92.519	-0.0471801	0.00483996
6	A6	125	92.782	-0.0444186	0.00559712
6	A6	126	93.0449	-0.0462857	0.00673919
6	A6	127	93.3078	-0.0487179	0.0077433
6	A6	128	93.5708	-0.0499859	0.00813068
6	A6	129	93.8337	-0.0491638	0.00770326
6	A6	130	94.0966	-0.0495823	0.00660473
6	A6	131	94.3596	-0.0481796	0.00518413
6	A6	132	94.6225	-0.0485571	0.0037804
6	A6	133	94.8854	-0.0517822	0.00258285
7	A7	1	60.1782	4.05571	0.226291
7	A7	2	60.4411	4.03922	0.221966
7	A7	3	60.7041	4.02107	0.21717
7	A7	4	60.967	4.0007	0.21329
7	A7	5	61.2299	3.97261	0.211866
7	A7	6	61.4929	3.95569	0.213989
7	A7	7	61.7558	3.9302	0.219743
7	A7	8	62.0187	3.92644	0.228003
7	A7	9	62.2817	3.888	0.236785
7	A7	10	62.5446	3.85307	0.244004
7	A7	11	62.8075	3.81652	0.24827
7	A7	12	63.0705	3.79006	0.249249
7	A7	13	63.3334	3.76564	0.247489
7	A7	14	63.5963	3.73341	0.243951
7	A7	15	63.8593	3.71632	0.239616
7	A7	16	64.1222	3.67631	0.235344
7	A7	17	64.3851	3.64243	0.231865
7	A7	18	64.6481	3.63117	0.22969
7	A7	19	64.911	3.61907	0.228978
7	A7	20	65.1739	3.57707	0.229468
7	A7	21	65.4369	3.54773	0.230607
7	A7	22	65.6998	3.52327	0.231792
7	A7	23	65.9627	3.50942	0.232572
7	A7	24	66.2257	3.469	0.232763
7	A7	25	66.4886	3.45123	0.232494
7	A7	26	66.7515	3.40987	0.2322
7	A7	27	67.0145	3.39392	0.232469
7	A7	28	67.2774	3.37142	0.233769
7	A7	29	67.5403	3.34818	0.236188
7	A7	30	67.8033	3.31587	0.239346
7	A7	31	68.0662	3.29061	0.242604
7	A7	32	68.3291	3.25848	0.245388
7	A7	33	68.5921	3.23416	0.247434
7	A7	34	68.855	3.19949	0.248817
7	A7	35	69.1179	3.17411	0.24976
7	A7	36	69.3809	3.14946	0.250415
7	A7	37	69.6438	3.12097	0.250796
7	A7	38	69.9067	3.08621	0.250896
7	A7	39	70.1697	3.05337	0.250894
7	A7	40	70.4326	3.02874	0.251186
7	A7	41	70.6955	3.00391	0.252204
7	A7	42	70.9585	2.97717	0.254087
7	A7	43	71.2214	2.94625	0.256511
7	A7	44	71.4843	2.9225	0.258805
7	A7	45	71.7473	2.88144	0.260327
7	A7	46	72.0102	2.85085	0.260816
7	A7	47	72.2732	2.82032	0.260498
7	A7	48	72.5361	2.79607	0.259865
7	A7	49	72.799	2.77472	0.259334
7	A7	50	73.0619	2.7314	0.259055
7	A7	51	73.3249	2.70524	0.258947
7	A7	52	73.5878	2.67714	0.258929
7	A7	53	73.8507	2.65001	0.259131
7	A7	54	74.1137	2.61491	0.259995
7	A7	55	74.3766	2.59044	0.262215
7	A7	56	74.6395	2.55761	0.26654
7	A7	57	74.9025	2.53337	0.27346
7	A7	58	75.1654	2.49916	0.28287
7	A7	59	75.4283	2.47565	0.293872
7	A7	60	75.6913	2.43375	0.304854
7	A7	61	75.9542	2.39678	0.313884
7	A7	62	76.2172	2.34922	0.319296
7	A7	63	76.4801	2.31477	0.320181
7	A7	64	76.743	2.27372	0.316608
7	A7	65	77.0059	2.24108	0.309537
7	A7	66	77.2689	2.20134	0.300517
7	A7	67	77.5318	2.16886	0.291318
7	A7	68	77.7948	2.1438	0.283562
7	A7	69	78.0577	2.11047	0.278465
7	A7	70	78.3206	2.08753	0.276752
7	A7	71	78.5836	2.05018	0.278819
7	A7	72	78.8465	2.02411	0.285158
7	A7	73	79.1094	1.98781	0.296925
7	A7	74	79.3723	1.95334	0.316495
7	A7	75	79.6353	1.92798	0.347825
7	A7	76	79.8982	1.89083	0.396458
7	A7	77	80.1612	1.85029	0.469034
7	A7	78	80.4241	1.81236	0.572086
7	A7	79	80.687	1.75721	0.710005
7	A7	80	80.95	1.68605	0.882251
7	A7	81	81.2129	1.59219	1.08041
7	A7	82	81.4758	1.45157	1.28617
7	A7	83	81.7388	1.25796	1.4718
7	A7	84	82.0017	1.02953	1.60422
7	A7	85	82.2646	0.774336	1.65304
7	A7	86	82.5276	0.441023	1.60023
7	A7	87	82.7905	0.143866	1.4478
7	A7	88	83.0534	0.0127322	1.21918
7	A7	89	83.3163	-0.0101792	0.952734
7	A7	90	83.5793	-0.01639	0.689829
7	A7	91	83.8422	-0.0196084	0.462969
7	A7	92	84.1052	-0.0265382	0.288991
7	A7	93	84.3681	-0.0291585	0.169205
7	A7	94	84.631	-0.0295167	0.0945275
7	A7	95	84.894	-0.032998	0.0519557
7	A7	96	85.1569	-0.0331889	0.0294385
7	A7	97	85.4198	-0.0336552	0.0181302
7	A7	98	85.6828	-0.0368868	0.012559
7	A7	99	85.9457	-0.0365081	0.00978249
7	A7	100	86.2086	-0.0362836	0.00837986
7	A7	101	86.4716	-0.0368705	0.00768504
7	A7	102	86.7345	-0.0387695	0.00734066
7	A7	103	86.9974	-0.0399038	0.00710826
7	A7	104	87.2604	-0.0408	0.00683332
7	A7	105	87.5233	-0.041654	0.00646771
7	A7	106	87.7862	-0.0438236	0.00607455
7	A7	107	88.0492	-0.0412164	0.00577882
7	A7	108	88.3121	-0.0414072	0.00567869
7	A7	109	88.575	-0.043684	0.00577221
7	A7	110	88.838	-0.0455197	0.00595145
7	A7	111	89.1009	-0.044877	0.00606764
7	A7	112	89.3638	-0.0467561	0.00601731
7	A7	113	89.6268	-0.047073	0.00578799
7	A7	114	89.8897	-0.0458907	0.00544225
7	A7	115	90.1526	-0.0486193	0.00506749
7	A7	116	90.4156	-0.048531	0.00473286
7	A7	117	90.6785	-0.0489039	0.00447305
7	A7	118	90.9414	-0.0476746	0.00429279
7	A7	119	91.2044	-0.0503413	0.0041799
7	A7	120	91.4673	-0.0501699	0.00412041
7	A7	121	91.7302	-0.0517291	0.00411045
7	A7	122	91.9932	-0.0487923	0.00415709
7	A7	123	92.2561	-0.05179	0.00426691
7	A7	124	92.519	-0.0523891	0.00443241
7	A7	125	92.782	-0.0533599	0.00462785
7	A7	126	93.0449	-0.0514219	0.00481415
7	A7	127	93.3078	-0.0535597	0.00494466
7	A7	128	93.5708	-0.0554604	0.0049681
7	A7	129	93.8337	-0.054815	0.00483319
7	A7	130	94.0966	-0.0551731	0.00449892
7	A7	131	94.3596	-0.0552672	0.00394944
7	A7	132	94.6225	-0.0579847	0.00320954
7	A7	133	94.8854	-0.057304	0.00235351
8	A8	1	60.1782	5.57179	0.251299
8	A8	2	60.4411	5.55572	0.248622
8	A8	3	60.7041	5.52696	0.245624
8	A8	4	60.967	5.49521	0.242949
8	A8	5	61.2299	5.4939	0.241118
8	A8	6	61.4929	5.44921	0.240404
8	A8	7	61.7558	5.40582	0.240928
8	A8	8	62.0187	5.39358	0.242778
8	A8	9	62.2817	5.36379	0.245984
8	A8	10	62.5446	5.33105	0.250359
8	A8	11	62.8075	5.31801	0.25539
8	A8	12	63.0705	5.26747	0.260393
8	A8	13	63.3334	5.23659	0.264773
8	A8	14	63.5963	5.20496	0.268263
8	A8	15	63.8593	5.17685	0.270841
8	A8	16	64.1222	5.13506	0.272539
8	A8	17	64.3851	5.11718	0.27328
8	A8	18	64.6481	5.06891	0.272986
8	A8	19	64.911	5.04597	0.271828
8	A8	20	65.1739	4.98972	0.270379
8	A8	21	65.4369	4.98359	0.269469
8	A8	22	65.6998	4.94061	0.269784
8	A8	23	65.9627	4.92158	0.27151
8	A8	24	66.2257	4.88819	0.274277
8	A8	25	66.4886	4.83126	0.277431
8	A8	26	66.7515	4.82258	0.2804
8	A8	27	67.0145	4.77929	0.282915
8	A8	28	67.2774	4.74314	0.284983
8	A8	29	67.5403	4.70989	0.28668
8	A8	30	67.8033	4.67526	0.287972
8	A8	31	68.0662	4.65082	0.288643
8	A8	32	68.3291	4.60332	0.288409
8	A8	33	68.5921	4.5636	0.287119
8	A8	34	68.855	4.54114	0.284919
8	A8	35	69.1179	4.50192	0.282282
8	A8	36	69.3809	4.45963	0.279852
8	A8	37	69.6438	4.43712	0.278214
8	A8	38	69.9067	4.403	0.277644
8	A8	39	70.1697	4.36889	0.278014
8	A8	40	70.4326	4.33601	0.278845
8	A8	41	70.6955	4.29855	0.279531
8	A8	42	70.9585	4.26489	0.279582
8	A8	43	71.2214	4.23503	0.278822
8	A8	44	71.4843	4.19551	0.277412
8	A8	45	71.7473	4.15574	0.275724
8	A8	46	72.0102	4.13686	0.274147
8	A8	47	72.2732	4.10688	0.272937
8	A8	48	72.5361	4.05981	0.272227
8	A8	49	72.799	4.03474	0.272148
8	A8	50	73.0619	3.99477	0.272872
8	A8	51	73.3249	3.96906	0.274521
8	A8	52	73.5878	3.94293	0.276958
8	A8	53	73.8507	3.90509	0.279725
8	A8	54	74.1137	3.86897	0.282237
8	A8	55	74.3766	3.82619	0.284102
8	A8	56	74.6395	3.79261	0.285296
8	A8	57	74.9025	3.76559	0.286011
8	A8	58	75.1654	3.73314	0.286314
8	A8	59	75.4283	3.69539	0.285944
8	A8	60	75.6913	3.65634	0.284462
8	A8	61	75.9542	3.62092	0.281654
8	A8	62	76.2172	3.57595	0.277852
8	A8	63	76.4801	3.55261	0.27387
8	A8	64	76.743	3.53663	0.270622
8	A8	65	77.0059	3.48753	0.268683
8	A8	66	77.2689	3.46256	0.268106
8	A8	67	77.5318	3.42856	0.268553
8	A8	68	77.7948	3.38769	0.269541
8	A8	69	78.0577	3.37166	0.270616
8	A8	70	78.3206	3.32824	0.271414
8	A8	71	78.5836	3.29534	0.271661
8	A8	72	78.8465	3.25967	0.271236
8	A8	73	79.1094	3.23167	0.27023
8	A8	74	79.3723	3.19623	0.268978
8	A8	75	79.6353	3.16526	0.267991
8	A8	76	79.8982	3.13325	0.267816
8	A8	77	80.1612	3.10571	0.268948
8	A8	78	80.4241	3.07475	0.271915
8	A8	79	80.687	3.04022	0.277679
8	A8	80	80.95	3.00558	0.28845
8	A8	81	81.2129	2.9709	0.308809
8	A8	82	81.4758	2.93105	0.346855
8	A8	83	81.7388	2.91015	0.414738
8	A8	84	82.0017	2.8683	0.527691
8	A8	85	82.2646	2.83515	0.700524
8	A8	86	82.5276	2.78009	0.941165
8	A8	87	82.7905	2.7112	1.24249
8	A8	88	83.0534	2.58758	1.57601
8	A8	89	83.3163	2.36133	1.89233
8	A8	90	83.5793	1.98023	2.13197
8	A8	91	83.8422	1.39107	2.24447
8	A8	92	84.1052	0.874141	2.20777
8	A8	93	84.3681	0.639895	2.03733
8	A8	94	84.631	0.565685	1.77921
8	A8	95	84.894	0.499122	1.49047
8	A8	96	85.1569	0.413098	1.21773
8	A8	97	85.4198	0.2969	0.984846
8	A8	98	85.6828	0.172835	0.793799
8	A8	99	85.9457	0.0749034	0.634626
8	A8	100	86.2086	0.0300402	0.496569
8	A8	101	86.4716	0.0146169	0.374389
8	A8	102	86.7345	0.0056467	0.268572
8	A8	103	86.9974	0.000706178	0.18199
8	A8	104	87.2604	0.000776646	0.116408
8	A8	105	87.5233	-4.96069e-05	0.0708542
8	A8	106	87.7862	-0.000374623	0.0419438
8	A8	107	88.0492	-0.00290291	0.0251926
8	A8	108	88.3121	-0.00171794	0.0162936
8	A8	109	88.575	-0.00590255	0.0118606
8	A8	110	88.838	-0.00522709	0.00962564
8	A8	111	89.1009	-0.00741893	0.0083014
8	A8	112	89.3638	-0.00789521	0.00731498
8	A8	113	89.6268	-0.00816494	0.00652887
8	A8	114	89.8897	-0.00792741	0.00599499
8	A8	115	90.1526	-0.00838676	0.00576468
8	A8	116	90.4156	-0.00817175	0.00578143
8	A8	117	90.6785	-0.0112298	0.00587581
8	A8	118	90.9414	-0.0125899	0.00584761
8	A8	119	91.2044	-0.0121088	0.00557723
8	A8	120	91.4673	-0.0135427	0.00509302
8	A8	121	91.7302	-0.0126138	0.00455233
8	A8	122	91.9932	-0.0134447	0.00415103
8	A8	123	92.2561	-0.0124586	0.00401933
8	A8	124	92.519	-0.0140522	0.00416277
8	A8	125	92.782	-0.0151941	0.00447227
8	A8	126	93.0449	-0.0158679	0.00478336
8	A8	127	93.3078	-0.015774	0.00494327
8	A8	128	93.5708	-0.0170828	0.00485396
8	A8	129	93.8337	-0.0178341	0.00448553
8	A8	130	94.0966	-0.0187061	0.00387188
8	A8	131	94.3596	-0.0181873	0.00309785
8	A8	132	94.6225	-0.0184679	0.0022778
8	A8	133	94.8854	-0.0182193	0.00152491
9	A9	1	60.1782	4.49121	0.271975
9	A9	2	60.4411	4.46538	0.26767
9	A9	3	60.7041	4.45348	0.263069
9	A9	4	60.967	4.43389	0.259371
9	A9	5	61.2299	4.41276	0.257369
9	A9	6	61.4929	4.39971	0.257132
9	A9	7	61.7558	4.37326	0.258193
9	A9	8	62.0187	4.32971	0.260099
9	A9	9	62.2817	4.32292	0.262796
9	A9	10	62.5446	4.29812	0.266601
9	A9	11	62.8075	4.27736	0.271862
9	A9	12	63.0705	4.26349	0.278638
9	A9	13	63.3334	4.2147	0.286637
9	A9	14	63.5963	4.20144	0.295321
9	A9	15	63.8593	4.1759	0.303999
9	A9	16	64.1222	4.15086	0.311917
9	A9	17	64.3851	4.11933	0.31839
9	A9	18	64.6481	4.08039	0.323006
9	A9	19	64.911	4.05259	0.325739
9	A9	20	65.1739	4.02721	0.326846
9	A9	21	65.4369	4.00925	0.326635
9	A9	22	65.6998	3.96251	0.325372
9	A9	23	65.9627	3.94002	0.323405
9	A9	24	66.2257	3.90597	0.32137
9	A9	25	66.4886	3.88087	0.32019
9	A9	26	66.7515	3.85566	0.320768
9	A9	27	67.0145	3.82962	0.323521
9	A9	28	67.2774	3.80382	0.32807
9	A9	29	67.5403	3.77073	0.333276
9	A9	30	67.8033	3.73944	0.337627
9	A9	31	68.0662	3.71338	0.339836
9	A9	32	68.3291	3.67726	0.339352
9	A9	33	68.5921	3.6292	0.33657
9	A9	34	68.855	3.6207	0.332605
9	A9	35	69.1179	3.59194	0.328775
9	A9	36	69.3809	3.54776	0.326039
9	A9	37	69.6438	3.53802	0.324682
9	A9	38	69.9067	3.49655	0.324359
9	A9	39	70.1697	3.47272	0.324399
9	A9	40	70.4326	3.43981	0.324178
9	A9	41	70.6955	3.4106	0.323375
9	A9	42	70.9585	3.37728	0.322005
9	A9	43	71.2214	3.35832	0.320322
9	A9	44	71.4843	3.32711	0.318697
9	A9	45	71.7473	3.29493	0.317529
9	A9	46	72.0102	3.2643	0.317191
9	A9	47	72.2732	3.24125	0.31791
9	A9	48	72.5361	3.21822	0.319618
9	A9	49	72.799	3.18587	0.321876
9	A9	50	73.0619	3.15492	0.324027
9	A9	51	73.3249	3.12263	0.325479
9	A9	52	73.5878	3.091	0.32596
9	A9	53	73.8507	3.07261	0.325551
9	A9	54	74.1137	3.03289	0.32452
9	A9	55	74.3766	3.00604	0.323073
9	A9	56	74.6395	2.98392	0.321285
9	A9	57	74.9025	2.95079	0.319193
9	A9	58	75.1654	2.91699	0.31698
9	A9	59	75.4283	2.885	0.315056
9	A9	60	75.6913	2.86904	0.313869
9	A9	61	75.9542	2.84233	0.313604
9	A9	62	76.2172	2.81044	0.313994
9	A9	63	76.4801	2.77729	0.314456
9	A9	64	76.743	2.756	0.314436
9	A9	65	77.0059	2.71525	0.313768
9	A9	66	77.2689	2.69945	0.312714
9	A9	67	77.5318	2.66632	0.311735
9	A9	68	77.7948	2.64109	0.311169
9	A9	69	78.0577	2.61653	0.311063
9	A9	70	78.3206	2.58292	0.311238
9	A9	71	78.5836	2.55136	0.311506
9	A9	72	78.8465	2.5297	0.311823
9	A9	73	79.1094	2.5045	0.312314
9	A9	74	79.3723	2.47176	0.313195
9	A9	75	79.6353	2.44141	0.314708
9	A9	76	79.8982	2.42054	0.317105
9	A9	77	80.1612	2.39191	0.320713
9	A9	78	80.4241	2.35986	0.326053
9	A9	79	80.687	2.33394	0.33403
9	A9	80	80.95	2.30194	0.346192
9	A9	81	81.2129	2.27209	0.365065
9	A9	82	81.4758	2.24367	0.394531
9	A9	83	81.7388	2.20661	0.440228
9	A9	84	82.0017	2.18037	0.509712
9	A9	85	82.2646	2.1331	0.611836
9	A9	86	82.5276	2.08444	0.754564
9	A9	87	82.7905	2.039	0.940723
9	A9	88	83.0534	1.96554	1.16247
9	A9	89	83.3163	1.8666	1.39711
9	A9	90	83.5793	1.72666	1.60808
9	A9	91	83.8422	1.50033	1.7537
9	A9	92	84.1052	1.14278	1.80187
9	A9	93	84.3681	0.852907	1.74441
9	A9	94	84.631	0.757266	1.60266
9	A9	95	84.894	0.716974	1.41995
9	A9	96	85.1569	0.675478	1.24392
9	A9	97	85.4198	0.631106	1.1075
9	A9	98	85.6828	0.568817	1.01809
9	A9	99	85.9457	0.481399	0.959245
9	A9	100	86.2086	0.335966	0.902689
9	A9	101	86.4716	0.162371	0.82366
9	A9	102	86.7345	0.0906091	0.711983
9	A9	103	86.9974	0.0828363	0.574469
9	A9	104	87.2604	0.0809494	0.429168
9	A9	105	87.5233	0.0806952	0.29593
9	A9	106	87.7862	0.0771018	0.188588
9	A9	107	88.0492	0.0770362	0.111888
9	A9	108	88.3121	0.0768261	0.0629511
9	A9	109	88.575	0.0763199	0.0349508
9	A9	110	88.838	0.0759842	0.0205468
9	A9	111	89.1009	0.0727171	0.01387
9	A9	112	89.3638	0.0727707	0.0110614
9	A9	113	89.6268	0.073319	0.00996127
9	A9	114	89.8897	0.0713012	0.00952549
9	A9	115	90.1526	0.0708057	0.00930554
9	A9	116	90.4156	0.0706625	0.00911305
9	A9	117	90.6785	0.068009	0.00886441
9	A9	118	90.9414	0.0674922	0.00853859
9	A9	119	91.2044	0.0696515	0.00817267
9	A9	120	91.4673	0.0655032	0.0078461
9	A9	121	91.7302	0.067051	0.00764781
9	A9	122	91.9932	0.0652725	0.00763976
9	A9	123	92.2561	0.0665305	0.00783147
9	A9	124	92.519	0.0638164	0.00817063
9	A9	125	92.782	0.0639628	0.00855049
9	A9	126	93.0449	0.0620268	0.008832
9	A9	127	93.3078	0.0622395	0.00887527
9	A9	128	93.5708	0.0613478	0.00857222
9	A9	129	93.8337	0.0583751	0.00787569
9	A9	130	94.0966	0.0600303	0.00681959
9	A9	131	94.3596	0.0585885	0.00551956
9	A9	132	94.6225	0.0592678	0.00414528
9	A9	133	94.8854	0.0588328	0.00287029
10	A10	1	60.1782	6.11068	0.274186
10	A10	2	60.4411	6.10919	0.276287
10	A10	3	60.7041	6.04319	0.277049
10	A10	4	60.967	6.00085	0.276186
10	A10	5	61.2299	5.97657	0.274152
10	A10	6	61.4929	5.95117	0.27177
10	A10	7	61.7558	5.92446	0.269716
10	A10	8	62.0187	5.87646	0.268285
10	A10	9	62.2817	5.84026	0.267576
10	A10	10	62.5446	5.81026	0.267782
10	A10	11	62.8075	5.76864	0.269202
10	A10	12	63.0705	5.75771	0.271992
10	A10	13	63.3334	5.71628	0.275898
10	A10	14	63.5963	5.66693	0.280304
10	A10	15	63.8593	5.64886	0.284576
10	A10	16	64.1222	5.59908	0.288417
10	A10	17	64.3851	5.5415	0.291927
10	A10	18	64.6481	5.53963	0.295291
10	A10	19	64.911	5.50278	0.298434
10	A10	20	65.1739	5.44408	0.300894
10	A10	21	65.4369	5.40567	0.30207
10	A10	22	65.6998	5.3694	0.301617
10	A10	23	65.9627	5.33939	0.299711
10	A10	24	66.2257	5.2845	0.297004
10	A10	25	66.4886	5.24947	0.294343
10	A10	26	66.7515	5.22694	0.292411
10	A10	27	67.0145	5.18815	0.291458
10	A10	28	67.2774	5.14412	0.291271
10	A10	29	67.5403	5.11039	0.291371
10	A10	30	67.8033	5.07641	0.291298
10	A10	31	68.0662	5.0318	0.290825
10	A10	32	68.3291	4.9959	0.290013
10	A10	33	68.5921	4.95892	0.289089
10	A10	34	68.855	4.93491	0.288286
10	A10	35	69.1179	4.87907	0.287735
10	A10	36	69.3809	4.8572	0.287481
10	A10	37	69.6438	4.8096	0.287542
10	A10	38	69.9067	4.77936	0.287931
10	A10	39	70.1697	4.73241	0.288615
10	A10	40	70.4326	4.71485	0.289429
10	A10	41	70.6955	4.6618	0.290063
10	A10	42	70.9585	4.62129	0.290175
10	A10	43	71.2214	4.60782	0.289583
10	A10	44	71.4843	4.53571	0.288417
10	A10	45	71.7473	4.51562	0.28711
10	A10	46	72.0102	4.48352	0.286164
10	A10	47	72.2732	4.44787	0.285875
10	A10	48	72.5361	4.41067	0.2862
10	A10	49	72.799	4.37229	0.286839
10	A10	50	73.0619	4.32609	0.287449
10	A10	51	73.3249	4.29567	0.287801
10	A10	52	73.5878	4.27071	0.287819
10	A10	53	73.8507	4.21671	0.287611
10	A10	54	74.1137	4.19316	0.287534
10	A10	55	74.3766	4.1411	0.288198
10	A10	56	74.6395	4.09725	0.290242
10	A10	57	74.9025	4.10076	0.293882
10	A10	58	75.1654	4.04997	0.298571
10	A10	59	75.4283	3.99501	0.303074
10	A10	60	75.6913	3.95491	0.305998
10	A10	61	75.9542	3.91145	0.306442
10	A10	62	76.2172	3.87487	0.304324
10	A10	63	76.4801	3.84811	0.300283
10	A10	64	76.743	3.79074	0.295357
10	A10	65	77.0059	3.75692	0.290687
10	A10	66	77.2689	3.7395	0.287354
10	A10	67	77.5318	3.67959	0.286284
10	A10	68	77.7948	3.66777	0.288165
10	A10	69	78.0577	3.62078	0.293346
10	A10	70	78.3206	3.58078	0.301724
10	A10	71	78.5836	3.552	0.312648
10	A10	72	78.8465	3.50957	0.324902
10	A10	73	79.1094	3.46852	0.336882
10	A10	74	79.3723	3.41511	0.347064
10	A10	75	79.6353	3.35957	0.354625
10	A10	76	79.8982	3.31574	0.35996
10	A10	77	80.1612	3.27366	0.364838
10	A10	78	80.4241	3.2284	0.372186
10	A10	79	80.687	3.18951	0.385785
10	A10	80	80.95	3.14184	0.410222
10	A10	81	81.2129	3.08747	0.451337
10	A10	82	81.4758	3.04635	0.51698
10	A10	83	81.7388	2.98158	0.617513
10	A10	84	82.0017	2.91422	0.765077
10	A10	85	82.2646	2.83522	0.970539
10	A10	86	82.5276	2.74403	1.23773
10	A10	87	82.7905	2.61618	1.55618
10	A10	88	83.0534	2.42687	1.89551
10	A10	89	83.3163	2.13013	2.206
10	A10	90	83.5793	1.65532	2.4281
10	A10	91	83.8422	1.05824	2.5094
10	A10	92	84.1052	0.538426	2.42295
10	A10	93	84.3681	0.182809	2.17813
10	A10	94	84.631	-0.031188	1.81858
10	A10	95	84.894	-0.101851	1.40778
10	A10	96	85.1569	-0.111461	1.00911
10	A10	97	85.4198	-0.113657	0.669292
10	A10	98	85.6828	-0.115659	0.410751
10	A10	99	85.9457	-0.116189	0.233691
10	A10	100	86.2086	-0.116253	0.124062
10	A10	101	86.4716	-0.117436	0.0625852
10	A10	102	86.7345	-0.118472	0.0313759
10	A10	103	86.9974	-0.12059	0.0170659
10	A10	104	87.2604	-0.121379	0.0111489
10	A10	105	87.5233	-0.121249	0.00889886
10	A10	106	87.7862	-0.12381	0.00799723
10	A10	107	88.0492	-0.124592	0.00745354
10	A10	108	88.3121	-0.127224	0.00693986
10	A10	109	88.575	-0.125276	0.00642744
10	A10	110	88.838	-0.124908	0.00598343
10	A10	111	89.1009	-0.127342	0.00565597
10	A10	112	89.3638	-0.128272	0.00543694
10	A10	113	89.6268	-0.129896	0.00529297
10	A10	114	89.8897	-0.12865	0.00521982
10	A10	115	90.1526	-0.129188	0.0052631
10	A10	116	90.4156	-0.130105	0.00548355
10	A10	117	90.6785	-0.131088	0.00589616
10	A10	118	90.9414	-0.13091	0.00643191
10	A10	119	91.2044	-0.133578	0.00694949
10	A10	120	91.4673	-0.134402	0.00728916
10	A10	121	91.7302	-0.134955	0.00733972
10	A10	122	91.9932	-0.137463	0.00708741
10	A10	123	92.2561	-0.137341	0.00662338
10	A10	124	92.519	-0.137571	0.00610306
10	A10	125	92.782	-0.137152	0.00567405
10	A10	126	93.0449	-0.138011	0.00540987
10	A10	127	93.3078	-0.140116	0.00528618
10	A10	128	93.5708	-0.140686	0.00520684
10	A10	129	93.8337	-0.141185	0.00505407
10	A10	130	94.0966	-0.139852	0.00473036
10	A10	131	94.3596	-0.142594	0.00418216
10	A10	132	94.6225	-0.145024	0.00341508
10	A10	133	94.8854	-0.142951	0.00250334
11	A11	1	60.1782	4.69869	0.200321
11	A11	2	60.4411	4.6945	0.200145
11	A11	3	60.7041	4.64337	0.19932
11	A11	4	60.967	4.62003	0.198142
11	A11	5	61.2299	4.62084	0.1972
11	A11	6	61.4929	4.58127	0.197039
11	A11	7	61.7558	4.55715	0.197846
11	A11	8	62.0187	4.53466	0.199366
11	A11	9	62.2817	4.50431	0.20104
11	A11	10	62.5446	4.49238	0.202344
11	A11	11	62.8075	4.45242	0.203074
11	A11	12	63.0705	4.41073	0.203444
11	A11	13	63.3334	4.40749	0.203945
11	A11	14	63.5963	4.38338	0.205032
11	A11	15	63.8593	4.3502	0.206853
11	A11	16	64.1222	4.31877	0.209142
11	A11	17	64.3851	4.29414	0.211305
11	A11	18	64.6481	4.27163	0.212644
11	A11	19	64.911	4.25134	0.212673
11	A11	20	65.1739	4.20246	0.211406
11	A11	21	65.4369	4.16824	0.209467
11	A11	22	65.6998	4.15932	0.207854
11	A11	23	65.9627	4.13727	0.20746
11	A11	24	66.2257	4.11486	0.208667
11	A11	25	66.4886	4.08127	0.21126
11	A11	26	66.7515	4.044	0.214653
11	A11	27	67.0145	4.02558	0.218183
11	A11	28	67.2774	4.00409	0.221249
11	A11	29	67.5403	3.96909	0.223337
11	A11	30	67.8033	3.93296	0.224067
11	A11	31	68.0662	3.91578	0.22334
11	A11	32	68.3291	3.86303	0.221467
11	A11	33	68.5921	3.85403	0.219139
11	A11	34	68.855	3.83135	0.217227
11	A11	35	69.1179	3.78517	0.216477
11	A11	36	69.3809	3.7688	0.217234
11	A11	37	69.6438	3.75135	0.219285
11	A11	38	69.9067	3.70596	0.221897
11	A11	39	70.1697	3.68981	0.224077
11	A11	40	70.4326	3.6588	0.224978
11	A11	41	70.6955	3.6035	0.224272
11	A11	42	70.9585	3.5971	0.22225
11	A11	43	71.2214	3.55871	0.219622
11	A11	44	71.4843	3.54471	0.217135
11	A11	45	71.7473	3.50891	0.215293
11	A11	46	72.0102	3.47919	0.21429
11	A11	47	72.2732	3.45177	0.21412
11	A11	48	72.5361	3.42833	0.214659
11	A11	49	72.799	3.40581	0.215693
11	A11	50	73.0619	3.36788	0.216907
11	A11	51	73.3249	3.3427	0.217921
11	A11	52	73.5878	3.31861	0.218409
11	A11	53	73.8507	3.27678	0.218221
11	A11	54	74.1137	3.26594	0.217492
11	A11	55	74.3766	3.22499	0.216656
11	A11	56	74.6395	3.19788	0.21635
11	A11	57	74.9025	3.17021	0.217198
11	A11	58	75.1654	3.15603	0.219499
11	A11	59	75.4283	3.12128	0.222994
11	A11	60	75.6913	3.08717	0.226844
11	A11	61	75.9542	3.06456	0.229921
11	A11	62	76.2172	3.02556	0.231274
11	A11	63	76.4801	2.98994	0.230561
11	A11	64	76.743	2.95995	0.228199
11	A11	65	77.0059	2.93601	0.225198
11	A11	66	77.2689	2.91136	0.222779
11	A11	67	77.5318	2.88173	0.221977
11	A11	68	77.7948	2.85271	0.22343
11	A11	69	78.0577	2.82473	0.227343
11	A11	70	78.3206	2.79917	0.233525
11	A11	71	78.5836	2.7707	0.241426
11	A11	72	78.8465	2.73322	0.250162
11	A11	73	79.1094	2.7016	0.258624
11	A11	74	79.3723	2.67174	0.265731
11	A11	75	79.6353	2.62354	0.270818
11	A11	76	79.8982	2.58477	0.274041
11	A11	77	80.1612	2.55754	0.276653
11	A11	78	80.4241	2.5168	0.281089
11	A11	79	80.687	2.49087	0.29091
11	A11	80	80.95	2.45245	0.310819
11	A11	81	81.2129	2.42143	0.346825
11	A11	82	81.4758	2.38508	0.406515
11	A11	83	81.7388	2.33848	0.498924
11	A11	84	82.0017	2.28866	0.633235
11	A11	85	82.2646	2.2223	0.815514
11	A11	86	82.5276	2.14125	1.0435
11	A11	87	82.7905	2.02408	1.30109
11	A11	88	83.0534	1.85959	1.55577
11	A11	89	83.3163	1.57071	1.76249
11	A11	90	83.5793	1.13252	1.87499
11	A11	91	83.8422	0.645544	1.86141
11	A11	92	84.1052	0.314722	1.71693
11	A11	93	84.3681	0.135622	1.46701
11	A11	94	84.631	0.0728976	1.15885
11	A11	95	84.894	0.0610121	0.845353
11	A11	96	85.1569	0.0596048	0.569281
11	A11	97	85.4198	0.0580652	0.354206
11	A11	98	85.6828	0.0565893	0.204227
11	A11	99	85.9457	0.0553603	0.109945
11	A11	100	86.2086	0.0539958	0.0562572
11	A11	101	86.4716	0.0531982	0.0284756
11	A11	102	86.7345	0.05249	0.0154118
11	A11	103	86.9974	0.0521625	0.00990154
11	A11	104	87.2604	0.0508636	0.00795414
11	A11	105	87.5233	0.0490244	0.00757137
11	A11	106	87.7862	0.0508366	0.00780039
11	A11	107	88.0492	0.0481271	0.00817023
11	A11	108	88.3121	0.043574	0.0084413
11	A11	109	88.575	0.0454134	0.00852787
11	A11	110	88.838	0.0447297	0.00846519
11	A11	111	89.1009	0.0416396	0.00835158
11	A11	112	89.3638	0.0448963	0.00826688
11	A11	113	89.6268	0.0407119	0.00821594
11	A11	114	89.8897	0.0386063	0.00813526
11	A11	115	90.1526	0.0372413	0.00795029
11	A11	116	90.4156	0.0400065	0.00763301
11	A11	117	90.6785	0.0369008	0.00721827
11	A11	118	90.9414	0.0341549	0.00677922
11	A11	119	91.2044	0.0368135	0.00639106
11	A11	120	91.4673	0.0345183	0.00610782
11	A11	121	91.7302	0.034528	0.00595697
11	A11	122	91.9932	0.0326987	0.00594545
11	A11	123	92.2561	0.0325483	0.00606846
11	A11	124	92.519	0.0324717	0.0063132
11	A11	125	92.782	0.0303425	0.00665021
11	A11	126	93.0449	0.0302289	0.00701526
11	A11	127	93.3078	0.0303214	0.00729823
11	A11	128	93.5708	0.0263248	0.00735903
11	A11	129	93.8337	0.02621	0.00707378
11	A11	130	94.0966	0.0250466	0.00639023
11	A11	131	94.3596	0.0250996	0.00535973
11	A11	132	94.6225	0.0245551	0.00412546
11	A11	133	94.8854	0.0238959	0.00287366
12	A12	1	60.1782	6.1038	0.283035
12	A12	2	60.4411	6.04814	0.284845
12	A12	3	60.7041	6.0304	0.285819
12	A12	4	60.967	5.98541	0.285629
12	A12	5	61.2299	5.94501	0.284504
12	A12	6	61.4929	5.91139	0.283122
12	A12	7	61.7558	5.86895	0.282283
12	A12	8	62.0187	5.85155	0.282517
12	A12	9	62.2817	5.79628	0.28385
12	A12	10	62.5446	5.77075	0.285814
12	A12	11	62.8075	5.72837	0.28762
12	A12	12	63.0705	5.68775	0.288442
12	A12	13	63.3334	5.64885	0.287757
12	A12	14	63.5963	5.62212	0.285574
12	A12	15	63.8593	5.54719	0.282532
12	A12	16	64.1222	5.53339	0.27967
12	A12	17	64.3851	5.50641	0.278018
12	A12	18	64.6481	5.47049	0.278192
12	A12	19	64.911	5.42894	0.28024
12	A12	20	65.1739	5.3807	0.283723
12	A12	21	65.4369	5.3577	0.287938
12	A12	22	65.6998	5.33056	0.292093
12	A12	23	65.9627	5.25928	0.295481
12	A12	24	66.2257	5.25319	0.297651
12	A12	25	66.4886	5.1789	0.298544
12	A12	26	66.7515	5.15435	0.298494
12	A12	27	67.0145	5.12303	0.298063
12	A12	28	67.2774	5.08399	0.297791
12	A12	29	67.5403	5.03182	0.297985
12	A12	30	67.8033	4.9841	0.298602
12	A12	31	68.0662	4.9922	0.29927
12	A12	32	68.3291	4.91749	0.29945
12	A12	33	68.5921	4.8633	0.298669
12	A12	34	68.855	4.84519	0.296702
12	A12	35	69.1179	4.801	0.293639
12	A12	36	69.3809	4.77285	0.28982
12	A12	37	69.6438	4.70899	0.285763
12	A12	38	69.9067	4.67883	0.282066
12	A12	39	70.1697	4.65486	0.279282
12	A12	40	70.4326	4.6183	0.277745
12	A12	41	70.6955	4.57133	0.277475
12	A12	42	70.9585	4.53941	0.27822
12	A12	43	71.2214	4.50849	0.279636
12	A12	44	71.4843	4.46535	0.281473
12	A12	45	71.7473	4.42568	0.283626
12	A12	46	72.0102	4.38626	0.286048
12	A12	47	72.2732	4.36289	0.288577
12	A12	48	72.5361	4.3156	0.290845
12	A12	49	72.799	4.27416	0.292336
12	A12	50	73.0619	4.22669	0.292589
12	A12	51	73.3249	4.20596	0.29145
12	A12	52	73.5878	4.14757	0.289176
12	A12	53	73.8507	4.11632	0.286357
12	A12	54	74.1137	4.0741	0.283649
12	A12	55	74.3766	4.05523	0.281479
12	A12	56	74.6395	4.01193	0.279915
12	A12	57	74.9025	3.96245	0.278759
12	A12	58	75.1654	3.9316	0.277814
12	A12	59	75.4283	3.89442	0.277065
12	A12	60	75.6913	3.85759	0.276639
12	A12	61	75.9542	3.82805	0.2766
12	A12	62	76.2172	3.78465	0.276789
12	A12	63	76.4801	3.75057	0.276837
12	A12	64	76.743	3.71348	0.276388
12	A12	65	77.0059	3.66706	0.275337
12	A12	66	77.2689	3.64144	0.273944
12	A12	67	77.5318	3.59681	0.272722
12	A12	68	77.7948	3.57059	0.272184
12	A12	69	78.0577	3.53507	0.2726
12	A12	70	78.3206	3.49004	0.273876
12	A12	71	78.5836	3.46298	0.275613
12	A12	72	78.8465	3.42427	0.277276
12	A12	73	79.1094	3.38129	0.278378
12	A12	74	79.3723	3.34328	0.278625
12	A12	75	79.6353	3.31237	0.27799
12	A12	76	79.8982	3.27681	0.276764
12	A12	77	80.1612	3.23201	0.275659
12	A12	78	80.4241	3.19711	0.276004
12	A12	79	80.687	3.17266	0.280108
12	A12	80	80.95	3.12974	0.291822
12	A12	81	81.2129	3.09583	0.317272
12	A12	82	81.4758	3.05835	0.365574
12	A12	83	81.7388	3.02784	0.449024
12	A12	84	82.0017	2.9846	0.581995
12	A12	85	82.2646	2.94184	0.777683
12	A12	86	82.5276	2.86662	1.04235
12	A12	87	82.7905	2.76247	1.36794
12	A12	88	83.0534	2.58083	1.72595
12	A12	89	83.3163	2.3341	2.06661
12	A12	90	83.5793	1.89454	2.32714
12	A12	91	83.8422	1.26995	2.44874
12	A12	92	84.1052	0.684038	2.39679
12	A12	93	84.3681	0.25297	2.17484
12	A12	94	84.631	0.0527577	1.82499
12	A12	95	84.894	0.00607833	1.41364
12	A12	96	85.1569	0.00312307	1.00953
12	A12	97	85.4198	-0.00183315	0.664216
12	A12	98	85.6828	-0.00307883	0.402693
12	A12	99	85.9457	-0.00350914	0.225339
12	A12	100	86.2086	-0.00409887	0.116936
12	A12	101	86.4716	-0.00527192	0.0569154
12	A12	102	86.7345	-0.00786079	0.0266689
12	A12	103	86.9974	-0.00720452	0.012742
12	A12	104	87.2604	-0.00499585	0.00690238
12	A12	105	87.5233	-0.00666482	0.00474363
12	A12	106	87.7862	-0.00851956	0.00412496
12	A12	107	88.0492	-0.0093694	0.00405218
12	A12	108	88.3121	-0.00891083	0.00406858
12	A12	109	88.575	-0.00949572	0.0039844
12	A12	110	88.838	-0.0106936	0.00376331
12	A12	111	89.1009	-0.0110854	0.00346238
12	A12	112	89.3638	-0.011716	0.00318555
12	A12	113	89.6268	-0.0106502	0.00303547
12	A12	114	89.8897	-0.0109568	0.00306154
12	A12	115	90.1526	-0.0112331	0.0032218
12	A12	116	90.4156	-0.0125935	0.00338681
12	A12	117	90.6785	-0.0147215	0.0033956
12	A12	118	90.9414	-0.0142322	0.00313608
12	A12	119	91.2044	-0.0135802	0.00260216
12	A12	120	91.4673	-0.0151314	0.00189641
12	A12	121	91.7302	-0.0140459	0.00118446
12	A12	122	91.9932	-0.0145642	0.000631102
12	A12	123	92.2561	-0.0127462	0.000346482
12	A12	124	92.519	-0.0143067	0.000356615
12	A12	125	92.782	-0.0134134	0.000602157
12	A12	126	93.0449	-0.0142236	0.000964521
12	A12	127	93.3078	-0.0144772	0.00131112
12	A12	128	93.5708	-0.015862	0.00154154
12	A12	129	93.8337	-0.0148037	0.00161346
12	A12	130	94.0966	-0.0152507	0.00153781
12	A12	131	94.3596	-0.0156215	0.00135292
12	A12	132	94.6225	-0.0147485	0.0010993
12	A12	133	94.8854	-0.0174972	0.000810886
13	A13	1	60.1782	4.6004	0.178721
13	A13	2	60.4411	4.55894	0.180018
13	A13	3	60.7041	4.54101	0.18205
13	A13	4	60.967	4.54281	0.184447
13	A13	5	61.2299	4.50602	0.186517
13	A13	6	61.4929	4.463	0.187497
13	A13	7	61.7558	4.43335	0.186913
13	A13	8	62.0187	4.40969	0.1848
13	A13	9	62.2817	4.38908	0.18167
13	A13	10	62.5446	4.36371	0.178343
13	A13	11	62.8075	4.33143	0.175749
13	A13	12	63.0705	4.30626	0.17476
13	A13	13	63.3334	4.2769	0.175949
13	A13	14	63.5963	4.27691	0.179315
13	A13	15	63.8593	4.24847	0.184187
13	A13	16	64.1222	4.20517	0.189427
13	A13	17	64.3851	4.17836	0.193918
13	A13	18	64.6481	4.14777	0.196994
13	A13	19	64.911	4.12028	0.198581
13	A13	20	65.1739	4.0922	0.199032
13	A13	21	65.4369	4.06402	0.198822
13	A13	22	65.6998	4.03381	0.198336
13	A13	23	65.9627	4.00395	0.19781
13	A13	24	66.2257	3.97436	0.197353
13	A13	25	66.4886	3.9525	0.197025
13	A13	26	66.7515	3.92298	0.196887
13	A13	27	67.0145	3.88491	0.197027
13	A13	28	67.2774	3.8652	0.197532
13	A13	29	67.5403	3.83209	0.198397
13	A13	30	67.8033	3.81401	0.199447
13	A13	31	68.0662	3.78319	0.20037
13	A13	32	68.3291	3.73458	0.200869
13	A13	33	68.5921	3.72777	0.20084
13	A13	34	68.855	3.68477	0.200435
13	A13	35	69.1179	3.65409	0.199948
13	A13	36	69.3809	3.638	0.199609
13	A13	37	69.6438	3.60129	0.199443
13	A13	38	69.9067	3.57634	0.199279
13	A13	39	70.1697	3.53511	0.198901
13	A13	40	70.4326	3.51288	0.198199
13	A13	41	70.6955	3.48796	0.197221
13	A13	42	70.9585	3.4556	0.196136
13	A13	43	71.2214	3.42148	0.195154
13	A13	44	71.4843	3.40806	0.194471
13	A13	45	71.7473	3.36811	0.194248
13	A13	46	72.0102	3.33954	0.194572
13	A13	47	72.2732	3.31778	0.195386
13	A13	48	72.5361	3.28876	0.196465
13	A13	49	72.799	3.26577	0.197475
13	A13	50	73.0619	3.22482	0.198165
13	A13	51	73.3249	3.19107	0.198545
13	A13	52	73.5878	3.16891	0.198883
13	A13	53	73.8507	3.14594	0.19949
13	A13	54	74.1137	3.11828	0.200449
13	A13	55	74.3766	3.08714	0.201496
13	A13	56	74.6395	3.04917	0.202183
13	A13	57	74.9025	3.02522	0.202171
13	A13	58	75.1654	2.98626	0.201438
13	A13	59	75.4283	2.96622	0.200258
13	A13	60	75.6913	2.93475	0.198992
13	A13	61	75.9542	2.90593	0.197885
13	A13	62	76.2172	2.88048	0.196987
13	A13	63	76.4801	2.84672	0.196256
13	A13	64	76.743	2.81838	0.195721
13	A13	65	77.0059	2.79409	0.195635
13	A13	66	77.2689	2.75762	0.196527
13	A13	67	77.5318	2.74119	0.199215
13	A13	68	77.7948	2.70806	0.204929
13	A13	69	78.0577	2.6817	0.215659
13	A13	70	78.3206	2.6466	0.234753
13	A13	71	78.5836	2.62231	0.26756
13	A13	72	78.8465	2.57985	0.321737
13	A13	73	79.1094	2.55823	0.406728
13	A13	74	79.3723	2.51434	0.53202
13	A13	75	79.6353	2.46894	0.703988
13	A13	76	79.8982	2.38708	0.921704
13	A13	77	80.1612	2.26508	1.17272
13	A13	78	80.4241	2.07034	1.4307
13	A13	79	80.687	1.80692	1.65707
13	A13	80	80.95	1.45362	1.80833
13	A13	81	81.2129	0.977543	1.84816
13	A13	82	81.4758	0.480569	1.76027
13	A13	83	81.7388	0.12518	1.55607
13	A13	84	82.0017	0.0261826	1.27249
13	A13	85	82.2646	0.0117124	0.960162
13	A13	86	82.5276	0.0106053	0.667347
13	A13	87	82.7905	0.00580394	0.426965
13	A13	88	83.0534	0.00764628	0.251732
13	A13	89	83.3163	0.00303176	0.137371
13	A13	90	83.5793	0.00394382	0.0701612
13	A13	91	83.8422	0.00274456	0.034383
13	A13	92	84.1052	0.00110502	0.0169856
13	A13	93	84.3681	-0.000648605	0.00915469
13	A13	94	84.631	0.00213053	0.00584205
13	A13	95	84.894	-0.000924883	0.00453699
13	A13	96	85.1569	0.00100446	0.00411724
13	A13	97	85.4198	-0.000595765	0.0040917
13	A13	98	85.6828	-0.00215924	0.00421832
13	A13	99	85.9457	-0.00256817	0.00435947
13	A13	100	86.2086	-0.00182603	0.00444286
13	A13	101	86.4716	-0.0049937	0.0044481
13	A13	102	86.7345	-0.00377118	0.00438935
13	A13	103	86.9974	-0.00527691	0.00429433
13	A13	104	87.2604	-0.00582916	0.00418848
13	A13	105	87.5233	-0.00635075	0.00408867
13	A13	106	87.7862	-0.00760726	0.00400382
13	A13	107	88.0492	-0.00651045	0.00393509
13	A13	108	88.3121	-0.00861196	0.00387178
13	A13	109	88.575	-0.00899604	0.00378692
13	A13	110	88.838	-0.00803073	0.00364289
13	A13	111	89.1009	-0.0101767	0.00341322
13	A13	112	89.3638	-0.0124874	0.00311117
13	A13	113	89.6268	-0.00978902	0.00280215
13	A13	114	89.8897	-0.00942949	0.00258179
13	A13	115	90.1526	-0.0116259	0.00252708
13	A13	116	90.4156	-0.0100226	0.00265292
13	A13	117	90.6785	-0.0130244	0.00290399
13	A13	118	90.9414	-0.0117698	0.00318394
13	A13	119	91.2044	-0.0128796	0.00339769
13	A13	120	91.4673	-0.013814	0.00348084
13	A13	121	91.7302	-0.0140667	0.003409
13	A13	122	91.9932	-0.015137	0.00319535
13	A13	123	92.2561	-0.0144872	0.00288503
13	A13	124	92.519	-0.015896	0.00254708
13	A13	125	92.782	-0.0154243	0.00225955
13	A13	126	93.0449	-0.0151403	0.00208675
13	A13	127	93.3078	-0.0155818	0.00205454
13	A13	128	93.5708	-0.0164725	0.00213478
13	A13	129	93.8337	-0.0156852	0.00224896
13	A13	130	94.0966	-0.0179622	0.00229408
13	A13	131	94.3596	-0.0170056	0.00218323
13	A13	132	94.6225	-0.0187913	0.00188385
13	A13	133	94.8854	-0.0187479	0.00143417
14	A14	1	60.1782	5.14739	0.219595
14	A14	2	60.4411	5.11406	0.220018
14	A14	3	60.7041	5.0878	0.219849
14	A14	4	60.967	5.06523	0.219134
14	A14	5	61.2299	5.02861	0.218143
14	A14	6	61.4929	5.01377	0.217168
14	A14	7	61.7558	4.98194	0.216374
14	A14	8	62.0187	4.94747	0.215821
14	A14	9	62.2817	4.92305	0.215587
14	A14	10	62.5446	4.89105	0.215865
14	A14	11	62.8075	4.86932	0.216906
14	A14	12	63.0705	4.84439	0.218869
14	A14	13	63.3334	4.80686	0.221667
14	A14	14	63.5963	4.78742	0.224919
14	A14	15	63.8593	4.75317	0.228021
14	A14	16	64.1222	4.71828	0.230307
14	A14	17	64.3851	4.69414	0.231243
14	A14	18	64.6481	4.65813	0.230648
14	A14	19	64.911	4.62455	0.228852
14	A14	20	65.1739	4.59601	0.226665
14	A14	21	65.4369	4.56335	0.225125
14	A14	22	65.6998	4.54324	0.225075
14	A14	23	65.9627	4.51738	0.226774
14	A14	24	66.2257	4.49184	0.229777
14	A14	25	66.4886	4.45545	0.233193
14	A14	26	66.7515	4.4152	0.236126
14	A14	27	67.0145	4.39708	0.238046
14	A14	28	67.2774	4.34436	0.238873
14	A14	29	67.5403	4.341	0.238834
14	A14	30	67.8033	4.29765	0.238275
14	A14	31	68.0662	4.25963	0.237585
14	A14	32	68.3291	4.23058	0.237226
14	A14	33	68.5921	4.21417	0.237711
14	A14	34	68.855	4.16161	0.239451
14	A14	35	69.1179	4.1518	0.242519
14	A14	36	69.3809	4.11288	0.246507
14	A14	37	69.6438	4.08687	0.250624
14	A14	38	69.9067	4.0359	0.254008
14	A14	39	70.1697	4.0098	0.256104
14	A14	40	70.4326	3.97413	0.256849
14	A14	41	70.6955	3.93332	0.256577
14	A14	42	70.9585	3.90696	0.255726
14	A14	43	71.2214	3.88545	0.254594
14	A14	44	71.4843	3.83384	0.25328
14	A14	45	71.7473	3.80477	0.251809
14	A14	46	72.0102	3.76754	0.250252
14	A14	47	72.2732	3.74799	0.248763
14	A14	48	72.5361	3.71164	0.247508
14	A14	49	72.799	3.67515	0.2466
14	A14	50	73.0619	3.63518	0.246051
14	A14	51	73.3249	3.61699	0.245752
14	A14	52	73.5878	3.58582	0.245474
14	A14	53	73.8507	3.54874	0.245016
14	A14	54	74.1137	3.51652	0.244423
14	A14	55	74.3766	3.468	0.24416
14	A14	56	74.6395	3.45295	0.244966
14	A14	57	74.9025	3.42886	0.247407
14	A14	58	75.1654	3.38971	0.251388
14	A14	59	75.4283	3.37014	0.256025
14	A14	60	75.6913	3.31074	0.259998
14	A14	61	75.9542	3.27613	0.262148
14	A14	62	76.2172	3.24872	0.261933
14	A14	63	76.4801	3.21569	0.259531
14	A14	64	76.743	3.176	0.255658
14	A14	65	77.0059	3.14046	0.251309
14	A14	66	77.2689	3.11177	0.247534
14	A14	67	77.5318	3.0819	0.245241
14	A14	68	77.7948	3.05738	0.245056
14	A14	69	78.0577	3.02142	0.247256
14	A14	70	78.3206	2.98766	0.251887
14	A14	71	78.5836	2.95429	0.259032
14	A14	72	78.8465	2.92464	0.269146
14	A14	73	79.1094	2.88958	0.283402
14	A14	74	79.3723	2.84744	0.304016
14	A14	75	79.6353	2.81308	0.334545
14	A14	76	79.8982	2.77438	0.380099
14	A14	77	80.1612	2.73386	0.447403
14	A14	78	80.4241	2.68878	0.544476
14	A14	79	80.687	2.61994	0.679579
14	A14	80	80.95	2.54544	0.858938
14	A14	81	81.2129	2.44572	1.08296
14	A14	82	81.4758	2.31492	1.34156
14	A14	83	81.7388	2.13582	1.61064
14	A14	84	82.0017	1.88956	1.85247
14	A14	85	82.2646	1.51863	2.02237
14	A14	86	82.5276	1.04407	2.08091
14	A14	87	82.7905	0.591184	2.00749
14	A14	88	83.0534	0.25649	1.80895
14	A14	89	83.3163	0.082117	1.51864
14	A14	90	83.5793	0.0138295	1.1859
14	A14	91	83.8422	-0.0104906	0.860778
14	A14	92	84.1052	-0.020005	0.580893
14	A14	93	84.3681	-0.0216582	0.365075
14	A14	94	84.631	-0.024443	0.214608
14	A14	95	84.894	-0.0244577	0.119241
14	A14	96	85.1569	-0.027185	0.0641656
14	A14	97	85.4198	-0.0259668	0.0352282
14	A14	98	85.6828	-0.0281533	0.0214814
14	A14	99	85.9457	-0.0294479	0.0156157
14	A14	100	86.2086	-0.0329553	0.013285
14	A14	101	86.4716	-0.032922	0.0121679
14	A14	102	86.7345	-0.0372655	0.011189
14	A14	103	86.9974	-0.0389091	0.00998914
14	A14	104	87.2604	-0.0387209	0.00858306
14	A14	105	87.5233	-0.0383134	0.00713135
14	A14	106	87.7862	-0.04036	0.0057959
14	A14	107	88.0492	-0.0404247	0.00467626
14	A14	108	88.3121	-0.0409557	0.00381497
14	A14	109	88.575	-0.0402935	0.00323445
14	A14	110	88.838	-0.0422818	0.0029587
14	A14	111	89.1009	-0.0400977	0.00299494
14	A14	112	89.3638	-0.0411058	0.00328972
14	A14	113	89.6268	-0.0413992	0.00370337
14	A14	114	89.8897	-0.0436341	0.00404001
14	A14	115	90.1526	-0.0454372	0.00412805
14	A14	116	90.4156	-0.045712	0.0039002
14	A14	117	90.6785	-0.0434413	0.0034146
14	A14	118	90.9414	-0.0445913	0.00280439
14	A14	119	91.2044	-0.0454553	0.00219965
14	A14	120	91.4673	-0.0463076	0.00168086
14	A14	121	91.7302	-0.0451291	0.0012845
14	A14	122	91.9932	-0.0455942	0.00103356
14	A14	123	92.2561	-0.0443585	0.000954471
14	A14	124	92.519	-0.0467197	0.00106676
14	A14	125	92.782	-0.0455357	0.00135877
14	A14	126	93.0449	-0.0446718	0.00177007
14	A14	127	93.3078	-0.0464085	0.00219447
14	A14	128	93.5708	-0.0474815	0.00250792
14	A14	129	93.8337	-0.0475409	0.00261302
14	A14	130	94.0966	-0.049624	0.0024775
14	A14	131	94.3596	-0.0457775	0.00214248
14	A14	132	94.6225	-0.0489964	0.00169557
14	A14	133	94.8854	-0.0488945	0.00122919
15	A15	1	60.1782	4.29082	0.445575
15	A15	2	60.4411	4.27088	0.440503
15	A15	3	60.7041	4.26468	0.432873
15	A15	4	60.967	4.23719	0.423572
15	A15	5	61.2299	4.21451	0.414253
15	A15	6	61.4929	4.1972	0.407093
15	A15	7	61.7558	4.17816	0.404264
15	A15	8	62.0187	4.15418	0.407191
15	A15	9	62.2817	4.15009	0.415977
15	A15	10	62.5446	4.12967	0.429323
15	A15	11	62.8075	4.09927	0.445116
15	A15	12	63.0705	4.07101	0.461371
15	A15	13	63.3334	4.06109	0.476864
15	A15	14	63.5963	4.02007	0.491158
15	A15	15	63.8593	4.01106	0.50421
15	A15	16	64.1222	3.98023	0.516052
15	A15	17	64.3851	3.95671	0.526806
15	A15	18	64.6481	3.91369	0.536883
15	A15	19	64.911	3.89703	0.546757
15	A15	20	65.1739	3.8787	0.556356
15	A15	21	65.4369	3.8412	0.564538
15	A15	22	65.6998	3.8298	0.569458
15	A15	23	65.9627	3.78031	0.56989
15	A15	24	66.2257	3.74498	0.566688
15	A15	25	66.4886	3.71277	0.563143
15	A15	26	66.7515	3.71052	0.563662
15	A15	27	67.0145	3.6778	0.571449
15	A15	28	67.2774	3.65058	0.586687
15	A15	29	67.5403	3.63432	0.606288
15	A15	30	67.8033	3.58993	0.625406
15	A15	31	68.0662	3.55227	0.639729
15	A15	32	68.3291	3.51616	0.647321
15	A15	33	68.5921	3.48678	0.649214
15	A15	34	68.855	3.46123	0.648547
15	A15	35	69.1179	3.40795	0.648876
15	A15	36	69.3809	3.40021	0.652404
15	A15	37	69.6438	3.37394	0.65899
15	A15	38	69.9067	3.32363	0.666427
15	A15	39	70.1697	3.2981	0.67185
15	A15	40	70.4326	3.24897	0.673371
15	A15	41	70.6955	3.2175	0.671052
15	A15	42	70.9585	3.18958	0.666618
15	A15	43	71.2214	3.1599	0.662325
15	A15	44	71.4843	3.12919	0.659784
15	A15	45	71.7473	3.08795	0.659431
15	A15	46	72.0102	3.06526	0.660754
15	A15	47	72.2732	3.02657	0.66291
15	A15	48	72.5361	2.9901	0.665217
15	A15	49	72.799	2.96317	0.667367
15	A15	50	73.0619	2.92708	0.669272
15	A15	51	73.3249	2.8915	0.670879
15	A15	52	73.5878	2.86301	0.672081
15	A15	53	73.8507	2.82565	0.672789
15	A15	54	74.1137	2.79114	0.673127
15	A15	55	74.3766	2.76074	0.673618
15	A15	56	74.6395	2.72173	0.675163
15	A15	57	74.9025	2.69311	0.678922
15	A15	58	75.1654	2.66266	0.686102
15	A15	59	75.4283	2.62263	0.697772
15	A15	60	75.6913	2.58908	0.714783
15	A15	61	75.9542	2.55675	0.737646
15	A15	62	76.2172	2.52116	0.76646
15	A15	63	76.4801	2.48321	0.800874
15	A15	64	76.743	2.43986	0.84017
15	A15	65	77.0059	2.39271	0.883352
15	A15	66	77.2689	2.35638	0.9291
15	A15	67	77.5318	2.30178	0.975527
15	A15	68	77.7948	2.25437	1.01992
15	A15	69	78.0577	2.1976	1.05872
15	A15	70	78.3206	2.13888	1.08785
15	A15	71	78.5836	2.07906	1.10344
15	A15	72	78.8465	2.02079	1.10256
15	A15	73	79.1094	1.96024	1.08403
15	A15	74	79.3723	1.90167	1.04885
15	A15	75	79.6353	1.84708	1.00044
15	A15	76	79.8982	1.8087	0.944453
15	A15	77	80.1612	1.7613	0.888283
15	A15	78	80.4241	1.72079	0.840324
15	A15	79	80.687	1.69174	0.808941
15	A15	80	80.95	1.6595	0.80109
15	A15	81	81.2129	1.62764	0.820526
15	A15	82	81.4758	1.58977	0.865883
15	A15	83	81.7388	1.55765	0.929403
15	A15	84	82.0017	1.51099	0.997498
15	A15	85	82.2646	1.44915	1.05403
15	A15	86	82.5276	1.36542	1.08591
15	A15	87	82.7905	1.27404	1.08862
15	A15	88	83.0534	1.22659	1.06871
15	A15	89	83.3163	1.19902	1.04096
15	A15	90	83.5793	1.16564	1.0212
15	A15	91	83.8422	1.12738	1.01828
15	A15	92	84.1052	1.08695	1.0293
15	A15	93	84.3681	1.02758	1.04101
15	A15	94	84.631	0.947099	1.03632
15	A15	95	84.894	0.863728	1.00282
15	A15	96	85.1569	0.809109	0.93911
15	A15	97	85.4198	0.780822	0.856127
15	A15	98	85.6828	0.758028	0.773762
15	A15	99	85.9457	0.737549	0.715258
15	A15	100	86.2086	0.715512	0.702158
[truncated: 48,312 more rows]
